# Supplementary material for: Crystal engineering of molecules with through-space α-effect hydrogen bonds: 3a,6 : 7,9a-diepoxybenzo[de]isoquinolines possessing a free amino group
Source: Royal Society of Chemistry journal article supplement (doi:10.1039/d2ce00903j), 2022-01-01

**Electronic supplementary materials for the paper**

**Crystal engineering of molecules with through-space  $\alpha$ -effect hydrogen bonds: 3a,6:7,9a-diepoxybenzo[de]isoquinolines possessing a free amino group**

*by Alexandra S. Antonova, Eugeniya V. Nikitina, Karina S. Valchuk, Mikhail S. Grigoriev, Rosa M. Gomila, Antonio Frontera, Fedor I. Zubkov*

**Table of contents:**

|                           |             |
|---------------------------|-------------|
| Synthetic details         | pages 2-5   |
| X-ray Data and refinement | pages 5-56  |
| NMR spectra               | pages 57-81 |

## Synthetic details

All commercially available reagents and solvents were used without further purification. Values of the melting point were measured on a capillary point apparatus equipped with a digital thermometer (SMP 30) and were left unchanged.  $^1\text{H}$  NMR,  $^{13}\text{C}$  NMR spectra were recorded on 400, 600, 700 (for  $^1\text{H}$ ), 100, 150, 176 (for  $^{13}\text{C}$ ) MHz spectrometers with TMS as the internal standard, using  $\text{CDCl}_3$  and  $\text{DMSO}-d_6$  as solvents. Data for  $^1\text{H}$  NMR spectra are reported as follows: chemical shift  $\delta$  (ppm), referenced to TMS; multiplicities are indicated as the following: s, singlet; d, doublet; t, triplet; q, quartet; m, multiplet; dd, doublet of doublets; coupling constants (Hz) and integration. Data for  $^{13}\text{C}$  NMR spectra are reported in terms of chemical shift  $\delta$  (ppm) relative to residual solvent peaks. IR spectra were obtained in KBr pellets or in thin films using an Infracum FT-801 IR-Fourier spectrometer. High-resolution MALDI mass spectra were obtained using a Bruker autoflex speed mass spectrometer equipped with a solid body UV-laser ( $\lambda = 355$  nm) and operated in positive reflectron mode. Solutions of the analytes in  $\text{CH}_2\text{Cl}_2$  (2 mg/mL) were mixed with a solution of 2,5-dihydrobeznoic acid in THF (2 mg/mL) and 1  $\mu\text{l}$  of the mixtures were spotted on a steel target plate and air-dried. Analytical TLC was performed on silica plates Sorbfil (visualization by  $\text{I}_2$  vapours or 0.1 %  $\text{KMnO}_4$  solution).

**General procedure for the synthesis of compounds 1–5.** (see Reference 8 of the main text for the synthesis of the precursors 6-9)

### Dimethyl (3aSR,4SR,5RS,6RS,6aSR,7RS,9aSR,9bRS)-octahydro-1H,4H,7H-3a,6:7,9a-diepoxybenzo[de]isoquinoline-4,5 dicarboxylate (1)

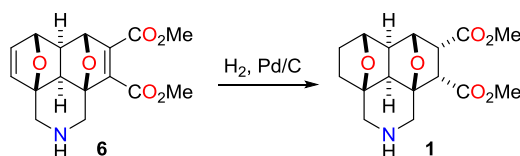

**Scheme S1.** Synthesis of **1**

A 0.025 M solution of the corresponding adduct **6** (2.5 mmol, 0.81 g) in EtOH was introduced into the continuous-flow hydrogenation H-Cube Pro<sup>TM</sup> device under the following condition: 7 cm steel cartridge charged with 10% Pd/C, 100% of  $\text{H}_2$  production (full mode), 80  $^\circ\text{C}$ , 80 atm., flow rate of 1  $\text{mL}\cdot\text{min}^{-1}$ . Evaporation of the obtained solution and recrystallization of the residue from EtOH affords pure product **1**.

Colorless needles (0.65 g, 2.0 mmol, 80%). m.p. 135.0–138.5  $^\circ\text{C}$  (from EtOH).

$^1\text{H}$  NMR ( $\text{CDCl}_3$ , 400.1 MHz)  $\delta = 4.68$  (1H, d,  $J = 5.3$  Hz, H-6), 4.48 (1H, d,  $J = 5.3$  Hz, H-7), 3.68 (3H, s,  $\text{CO}_2\text{Me}$ ), 3.67 (3H, s,  $\text{CO}_2\text{Me}$ ), 3.39 (1H, dd,  $J = 5.3$  and  $J = 12.0$  Hz, H-5), 3.25 (1H, d,  $J = 14.7$  Hz, H-1A), 3.16 (1H, d,  $J = 14.7$  Hz, H-3A), 3.08 (1H, d,  $J = 14.7$  Hz, H-3B), 2.94 (1H, d,  $J = 14.7$  Hz, H-1B), 2.76 (1H, d,  $J = 12.0$  Hz, H-4), 2.52 (1H, d,  $J = 6.9$  Hz, H-9b), 2.49 (1H, d,  $J = 6.9$  Hz, H-6a), 2.34 (1H, br s, NH), 1.83–1.75 (1H, m, H-8A), 1.56–1.50 (1H, m, H-8B), 1.44–1.40 (1H, m, H-9A), 1.39–1.31 (1H, m, H-9B) ppm.  $^{13}\text{C}$  NMR ( $\text{CDCl}_3$ , 100.6 MHz)  $\delta = 170.5, 84.6, 81.7, 81.1, 79.6, 77.5, 77.1, 76.8, 51.7, 51.6, 50.1, 50.0, 49.9, 47.7, 47.1, 45.1, 32.1, 30.7$  ppm. IR  $\nu_{\text{max}}/\text{cm}^{-1}$  (tablet KBr): 3313, 2956, 2886, 1747, 1432, 1195. MALDI-HRMS: found,  $m/z$ : 324.1452  $[\text{M}+\text{H}]^+$ .  $\text{C}_{16}\text{H}_{22}\text{NO}_6$ . Calculated, 324.1447.

The sample for the XRD experiment was obtained from an ethyl acetate/heptane solution at r.t.

**Dimethyl (3a*RS*,6*SR*,7*RS*,9a*SR*)-hexahydro-1*H*,4*H*,7*H*-3a,6:7,9a*diepoxy*benzo[*de*]isoquinoline-6a,9b-dicarboxylate (2)**

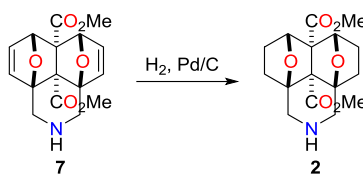

**Scheme S2. Synthesis of 2**

A 0.025 M solution of adduct **7** (2.5 mmol, 0.81 g) in EtOH was introduced into a continuous-flow hydrogenation H-Cube Pro™ device under the following conditions: 7 cm steel cartridge charged with 10% Pd/C, 100% of H<sub>2</sub> production (full mode), 80 °C, 40 atm, flow rate of 1 mL·min<sup>-1</sup>. Evaporation of the obtained solution and recrystallization of the residue from EtOH affords pure product **2** as colorless needles (0.58 g, 1.8 mmol, 72%), m.p. 108.4–110.1 °C (from EtOH).

<sup>1</sup>H NMR (CDCl<sub>3</sub>, 600.2 MHz) δ = 4.64 (2H, d, J = 5.5 Hz, H-6 and H-7), 3.75 (3H, s, CO<sub>2</sub>Me), 3.72 (3H, s, CO<sub>2</sub>Me), 3.22 (2H, d, J = 14.8 Hz, H-1A and H-3A), 3.11 (2H, d, J = 14.8 Hz, H-1B and H-3B), 2.15 (1H, br s, NH), 1.96–1.91, 1.84–1.77 and 1.34–1.29 (8H, m, H-4, H-5, H-8 and H-9) ppm. <sup>13</sup>C NMR (CDCl<sub>3</sub>, 100.6 MHz) δ = 169.4, 86.2, 82.7, 68.9, 62.7, 51.6, 51.5, 47.3, 30.6, 29.0 ppm. IR ν<sub>max</sub>/cm<sup>-1</sup> (tablet KBr): 3331, 2955, 1746, 1719, 1430, 1247. MALDI-HRMS: found, m/z: 324.1440 [M+H]<sup>+</sup>. C<sub>16</sub>H<sub>22</sub>NO<sub>6</sub> Calculated, 324.1447.

The sample for RSA experiment was obtained from ethyl acetate/heptane solution at r.t.

**(3a*SR*,3a1*RS*,6*RS*,6a*SR*,7*RS*,10b*SR*)-9-Phenyl-2,3,6a,7,7a,10a-hexahydro-1*H*,6*H*-3a,6:7,10b-*diepoxy*benzo[*de*]pyrrolo[3,4-*h*]isoquinoline-8,10(3a1*H*,9*H*)-dione (3)**

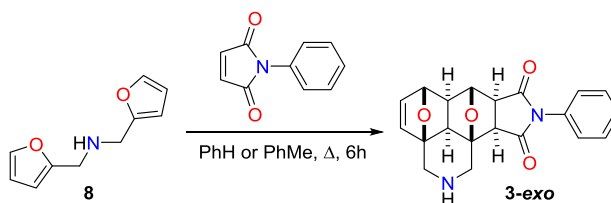

**Scheme S3. Synthesis of 3**

**Method A.** N-Phenylmaleimide (0.01 mol, 0.90 g) was added to a solution of difurfurylamine **8** (0.01 mol, 0.92 g) in benzene (30 mL). The reaction mixture was refluxed for 6 h and then cooled to r.t. Next day, product **3** was filtered off and washed with benzene (2 x 5 mL). This method affords a mixture of *exo/endo* diastereoisomers in the ratio of 80/20 (yield 90%).

**Method B.** N-Phenylmaleimide (0.01 mol, 0.90 g) was added to a solution of difurfurylamine **8** (0.01 mol, 0.92 g) in toluene (30 mL). The reaction mixture was heated at reflux for 6 h. After cooling to r.t, the pure *exo*-isomer **3** was filtered off and washed with toluene (2 x 5 mL). White powder (1.69 g, 4.8 mmol, 93%), m.p. 252–255 °C (dec.). The NMR data are given for a mixture of the both isomers.

<sup>1</sup>H NMR (DMSO-*d*<sub>6</sub>, 700 MHz): δ = 7.61–7.47 (m, 5H, H-Ph, *maj*), 7.33–7.16 (m, 5H, *min*), 7.26 (d, 2H, J = 7.9 Hz, ), 7.19 (d, 2H, J = 7.6 Hz, ), 6.44 (s, 1H, H-5, *maj+min*), 6.34 (s, 1H, H-4), 6.28 (d, 1H, J = 5.5 Hz, H-4 *min*), 4.95 (s, 1H, H-6, *min*), 4.92 (s, 1H, H-6, *maj*), 4.74 (s, 1H, H-7, *min*), 4.72 (s, 1H, H-7, *maj*), 4.26 (dd, 1H, J = 9.1, 4.7 Hz, H-3A, *maj+min*), 3.50 (d, 1H, J = 12.5 Hz, H-3B, *maj+min*), 3.29 (d, 1H, J = 7.2 Hz, H-10a, *maj*), 3.21 (d, 2H, J = 14.5 Hz, H-1A and 1B, *min*), 3.15 (d, 1H, J = 7.0 Hz, H-7a, *maj*), 2.17 (d, 1H, J = 6.5 Hz, H-6a, *maj*), 2.16 (d, 1H, J = 6.4 Hz, H-6a, *min*), 1.88 (d, 1H, J = 6.4 Hz, H-10c, *min*), 1.86 (d, 1H, J = 6.4 Hz, H-10c, *maj*) ppm. <sup>13</sup>C NMR (DMSO-*d*<sub>6</sub>, 176 MHz): δ = 176.90, 176.23, 174.99, 174.92, 138.59, 138.51, 138.34, 138.20, 132.70, 132.64, 129.46, 129.43, 128.95, 128.89, 128.84, 127.63, 127.39, 127.30, 85.12, 84.55, 83.26, 83.00, 81.15, 80.82, 80.76, 62.45, 52.10, 51.99, 51.73, 51.61, 50.51, 49.70, 49.48, 47.79, 47.44, 46.75, 45.87, 45.46, 32.29, 25.97 ppm. IR  $\nu_{\max}/\text{cm}^{-1}$  (tablet KBr): 2878, 2944, 1745, 1686, 1475, 1365. MALDI-HRMS: found, *m/z*: 351.1300 [M+H]<sup>+</sup>. C<sub>20</sub>H<sub>18</sub>N<sub>2</sub>O<sub>4</sub> Calculated, 351.1312.

The sample for the XRD experiment was obtained from a methanol/DMF solution at r.t.

**Dimethyl (3a*SR*,6*RS*,7*SR*,8*bSR*)-2,3,3a1,6a,7a,8a-hexahydro-1*H*,6*H*,7*H*-3a,6:7,8*b*-diepoxybenzo[*de*]oxireno[2,3-*h*]isoquinoline-4,5-dicarboxylate (4)**

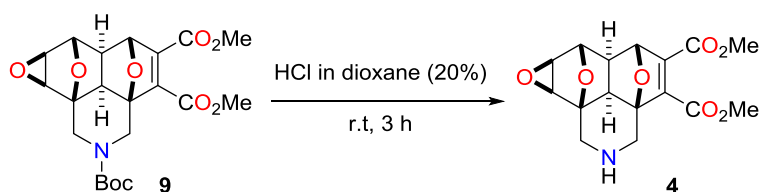

**Scheme S4. Synthesis of 4**

HCl (20%) in dioxane (10 mL) was slowly added to a solution of **9** (2 mmol, 0.1 g) in abs. dioxane (10 mL) at r.t. The reaction mixture was stirred at r.t for 3 h and then was poured into cold water (25 mL). The obtained solution was gently treated with NH<sub>4</sub>OH (25%) until pH ~ 12. After extraction with DCM (3 × 25 mL) the organic layers were combined and dried under anhydrous Na<sub>2</sub>SO<sub>4</sub>. Solvent was evaporated to give product **4** as white solid.

White powder (0.76 g, 0.23 mmol, 98%), m.p. 270–272 °C (dec.) <sup>1</sup>H NMR (DMSO-*d*<sub>6</sub>, 700 MHz): δ = 5.16 (s, 1H, H-6), 4.48 (s, 1H, H-1A), 3.80 (s, 3H, CO<sub>2</sub>Me), 3.69 (s, 3H, CO<sub>2</sub>Me), 3.44–3.35 (m, 2H, H-3a), 3.30 (d, 1H, J = 3.3 Hz, H-7a), 3.22 (d, 1H, J = 14.9 Hz, H-8a), 3.12 (d, 1H, J = 3.3 Hz, H-7), 3.03 (d, 1H, J = 15.0 Hz, H-6a), 2.25–2.20 (m, 1H, NH), 1.99 (d, 1H, J = 6.4 Hz, H-8c) ppm. <sup>13</sup>C NMR (DMSO-*d*<sub>6</sub>, 176.1 MHz) δ = 169.7, 169.2, 141.3, 137.8, 85.9, 83.7, 71.4, 67.1, 53.00, 52.6, 42.2 ppm. IR  $\nu_{\max}/\text{cm}^{-1}$  (tablet KBr): 3222, 2965, 1731, 1684, 1435, 1313. MALDI-HRMS: found, *m/z*: 335.1010 [M+H]<sup>+</sup>. C<sub>16</sub>H<sub>17</sub>NO<sub>7</sub>. Calculated, 335.1005.

The sample for the XRD experiment was obtained by slow crystallization from a mixture of ethyl acetate/heptane at r.t.

**Dimethyl (3a*SR*,6*RS*,6a*SR*,7*RS*,9a*SR*,9*bRS*)-2,3,6a,9*b*-tetrahydro-1*H*,6*H*,7*H*-3a,6:7,9a-diepoxybenzo[*de*]isoquinoline-4,5-dicarboxylate (5)**

HCl in dioxane (20%, 10 mL) was added dropwise to a solution of the initial adduct **10** (0.5 g, 0.0012 mol) in Et<sub>2</sub>O (abs., 20 mL) at  $-10\text{ }^{\circ}\text{C} - 0\text{ }^{\circ}\text{C}$ . The mixture was stirred for 2 h at r.t., until crystals of the hydrochloride were completely formed. The obtained crystals of **5** were filtered off and washed with dioxane (2  $\square$  5 mL).

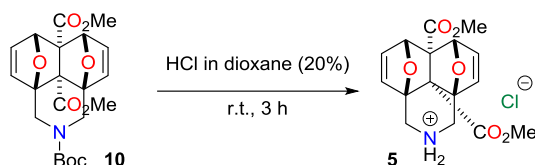

**Scheme S5.** Synthesis of **5**

White powder (0.33 g, 1.1 mmol, 87%).  $R_f$  0.20 (EtOAc, Sorbfil); m.p. 193.8–195.2  $^{\circ}\text{C}$ .  $^1\text{H}$  NMR (400.2 MHz,  $\text{CDCl}_3$ )  $\delta$  6.51 (1H, dd,  $J = 1.7$  and  $J = 5.6$  Hz, H-8), 6.33 (1H, d,  $J = 5.6$  Hz, H-9), 5.18 (1H, s, H-6), 4.98 (1H, d,  $J = 1.7$  Hz, H-7), 3.82 (3H, s,  $\text{CO}_2\text{Me}$ ), 3.78 (3H, s,  $\text{CO}_2\text{Me}$ ), 3.48 (1H, d,  $J = 14.8$  Hz, H-1A), 3.46 (1H, d,  $J = 14.8$  Hz, H-3A), 3.31 (1H, d,  $J = 14.8$  Hz, H-1B), 3.18 (1H, d,  $J = 14.8$  Hz, H-3B), 2.27 (1H, d,  $J = 6.2$  Hz, H-6a), 2.18 (1H, br s, NH), 2.07 (1H, d,  $J = 6.2$  Hz, H-9b).  $^{13}\text{C}$  NMR (100.6 MHz,  $\text{CDCl}_3$ )  $\delta$  163.9, 162.6, 148.5, 145.4, 139.1, 138.9, 87.3, 84.1, 81.7, 80.7, 52.3, 51.0, 49.2, 46.0, 44.4. MALDI-HRMS: found,  $m/z$ : 320.1136  $[\text{M}+\text{H}]^+$ .  $\text{C}_{16}\text{H}_{18}\text{NO}_6$ . Calculated, 320.1134. The sample for the XRD experiment was obtained from chloroform solution at r.t.

### X-ray Data and refinement

|                                       |                                         |
|---------------------------------------|-----------------------------------------|
| Identification code                   | FZ1163                                  |
| Empirical formula                     | $\text{C}_{16}\text{H}_{21}\text{NO}_6$ |
| Formula weight                        | 323.34                                  |
| Temperature/K                         | 296(2)                                  |
| Crystal system                        | orthorhombic                            |
| Space group                           | Pbca                                    |
| $a/\text{\AA}$                        | 8.2376(5)                               |
| $b/\text{\AA}$                        | 18.9540(12)                             |
| $c/\text{\AA}$                        | 19.6823(12)                             |
| $\alpha/^\circ$                       | 90                                      |
| $\beta/^\circ$                        | 90                                      |
| $\gamma/^\circ$                       | 90                                      |
| Volume/ $\text{\AA}^3$                | 3073.1(3)                               |
| $Z$                                   | 8                                       |
| $\rho_{\text{calc}}/\text{g cm}^{-3}$ | 1.398                                   |
| $\mu/\text{mm}^{-1}$                  | 0.107                                   |
| $F(000)$                              | 1376.0                                  |
| Crystal size/ $\text{mm}^3$           | $0.5 \times 0.3 \times 0.2$             |

|                                                |                                                                    |
|------------------------------------------------|--------------------------------------------------------------------|
| Radiation                                      | MoK $\alpha$ ( $\lambda = 0.71073$ )                               |
| 2 $\theta$ range for data collection/ $^\circ$ | 8.228 to 54.992                                                    |
| Index ranges                                   | $-10 \leq h \leq 10$ , $-24 \leq k \leq 24$ , $-25 \leq l \leq 25$ |
| Reflections collected                          | 44252                                                              |
| Independent reflections                        | 3516 [ $R_{\text{int}} = 0.0600$ , $R_{\text{sigma}} = 0.0280$ ]   |
| Data/restraints/parameters                     | 3516/0/212                                                         |
| Goodness-of-fit on $F^2$                       | 1.012                                                              |
| Final R indexes [ $I \geq 2\sigma(I)$ ]        | $R_1 = 0.0428$ , $wR_2 = 0.0953$                                   |
| Final R indexes [all data]                     | $R_1 = 0.0718$ , $wR_2 = 0.1095$                                   |
| Largest diff. peak/hole / $e \text{ \AA}^{-3}$ | 0.25/-0.18                                                         |

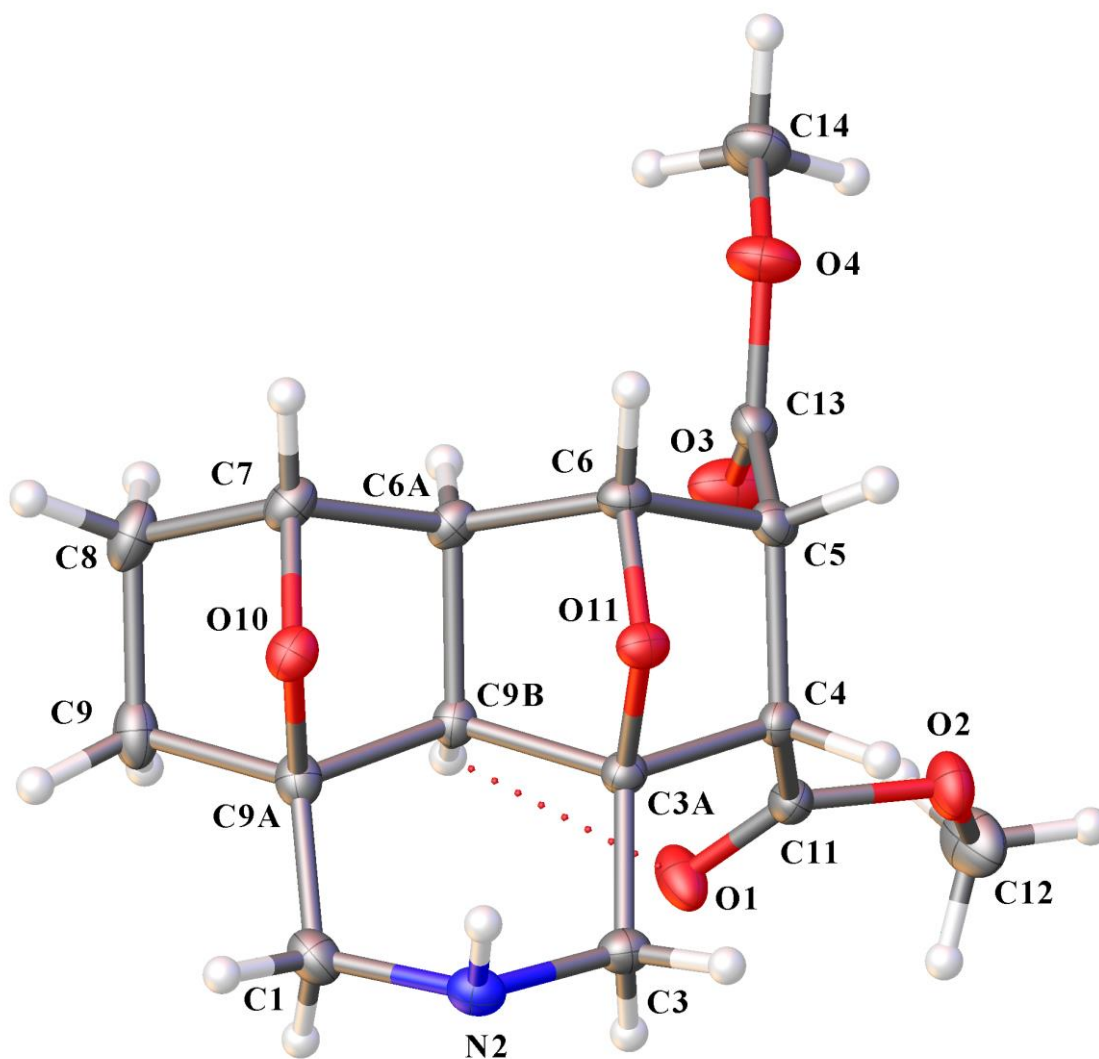

**Figure S1.** Molecule of compound 1. A weak C-H...O bond is depicted in the picture

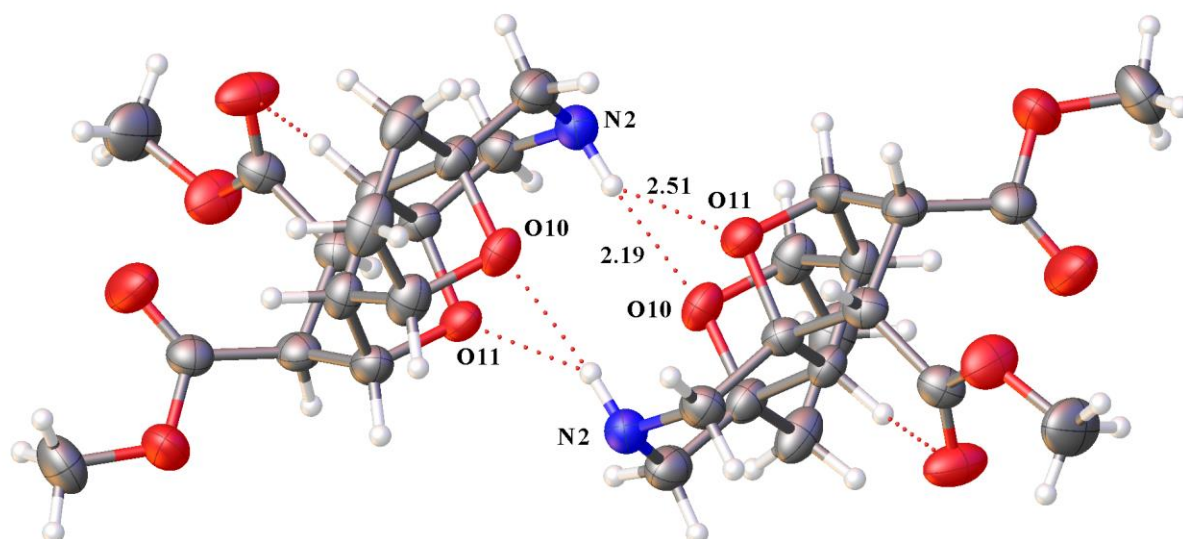

**Figure S2.** Dimer of two molecules in the crystal packing of compound **1**

**Table S2 Fractional Atomic Coordinates ( $\times 10^4$ ) and Equivalent Isotropic Displacement Parameters ( $\text{\AA}^2 \times 10^3$ ) for **1**.  $U_{eq}$  is defined as 1/3 of the trace of the orthogonalised  $U_{ij}$  tensor.**

| Atom | <i>x</i>   | <i>y</i>   | <i>z</i>   | $U_{eq}$ |
|------|------------|------------|------------|----------|
| O1   | 1411.1(17) | 6643.4(7)  | 6938.6(7)  | 58.1(4)  |
| O2   | 325.8(17)  | 7453.7(7)  | 6259.9(7)  | 55.4(4)  |
| O3   | 3633(2)    | 7911.6(8)  | 6585.0(7)  | 70.3(5)  |
| O4   | 5271.6(18) | 8237.4(6)  | 5750.6(7)  | 56.9(4)  |
| O10  | 6430.3(14) | 5269.0(6)  | 5811.7(5)  | 39.8(3)  |
| O11  | 4185.5(14) | 6105.5(5)  | 5165.7(5)  | 36.6(3)  |
| N2   | 3031.9(19) | 4697.6(7)  | 5696.8(8)  | 43.2(4)  |
| C1   | 4130(2)    | 4628.6(9)  | 6274.1(9)  | 46.3(4)  |
| C3A  | 3191.9(19) | 6012.4(8)  | 5768.2(8)  | 32.5(3)  |
| C3   | 2143(2)    | 5362.5(8)  | 5703.3(9)  | 40.6(4)  |
| C4   | 2308(2)    | 6731.9(8)  | 5771.2(8)  | 34.8(4)  |
| C5   | 3704(2)    | 7239.8(8)  | 5543.3(8)  | 37.2(4)  |
| C6   | 5091(2)    | 6700.8(8)  | 5403.2(8)  | 37.5(4)  |
| C6A  | 5839(2)    | 6447.6(8)  | 6070.6(8)  | 36.7(4)  |
| C7   | 7233(2)    | 5909.0(9)  | 6018.5(9)  | 42.9(4)  |
| C8   | 7816(2)    | 5716.9(11) | 6732.4(9)  | 52.5(5)  |
| C9B  | 4455.5(19) | 5967.4(8)  | 6339.2(7)  | 32.2(3)  |
| C9A  | 5278(2)    | 5239.1(8)  | 6370.4(8)  | 37.4(4)  |
| C9   | 6436(2)    | 5229.9(10) | 6981.9(9)  | 49.2(5)  |
| C11  | 1367(2)    | 6928.5(9)  | 6397.8(9)  | 37.8(4)  |
| C12  | -541(3)    | 7731.2(11) | 6836.0(12) | 69.4(7)  |
| C13  | 4153(2)    | 7821.0(8)  | 6026.7(9)  | 38.9(4)  |

**Table S2 Fractional Atomic Coordinates ( $\times 10^4$ ) and Equivalent Isotropic Displacement Parameters ( $\text{\AA}^2 \times 10^3$ ) for 1.  $U_{eq}$  is defined as 1/3 of the trace of the orthogonalised  $U_{ij}$  tensor.**

| Atom | x       | y          | z          | U(eq)   |
|------|---------|------------|------------|---------|
| C14  | 5756(3) | 8847.0(10) | 6140.5(12) | 62.9(6) |

**Table S3 Anisotropic Displacement Parameters ( $\text{\AA}^2 \times 10^3$ ) for 1. The Anisotropic displacement factor exponent takes the form:  $-2\pi^2[h^2a^*U_{11}+2hka^*b^*U_{12}+\dots]$ .**

| Atom | U <sub>11</sub> | U <sub>22</sub> | U <sub>33</sub> | U <sub>23</sub> | U <sub>13</sub> | U <sub>12</sub> |
|------|-----------------|-----------------|-----------------|-----------------|-----------------|-----------------|
| O1   | 60.3(9)         | 62.9(8)         | 51.0(8)         | 22.1(6)         | 20.2(7)         | 23.8(7)         |
| O2   | 56.9(8)         | 55.2(8)         | 54.2(8)         | 8.5(6)          | 4.4(6)          | 24.4(7)         |
| O3   | 85.4(11)        | 80.6(10)        | 45.0(8)         | -13.8(7)        | 15.3(8)         | -32.4(9)        |
| O4   | 65.8(9)         | 44.5(7)         | 60.4(8)         | -4.9(6)         | 16.8(7)         | -17.9(7)        |
| O10  | 38.0(6)         | 47.2(7)         | 34.1(6)         | -9.3(5)         | 4.4(5)          | 6.1(5)          |
| O11  | 39.5(6)         | 42.4(6)         | 27.8(5)         | -2.8(5)         | 2.7(5)          | -5.9(5)         |
| N2   | 48.3(9)         | 38.3(7)         | 43.1(8)         | -3.6(6)         | 7.7(7)          | -4.2(7)         |
| C1   | 55.7(11)        | 40.3(9)         | 42.9(10)        | 4.1(7)          | 8.0(9)          | 6.3(8)          |
| C3A  | 30.7(8)         | 36.9(8)         | 29.8(8)         | 1.1(6)          | 2.0(6)          | -0.7(6)         |
| C3   | 37.7(9)         | 42.2(9)         | 41.8(9)         | 0.0(7)          | 2.7(7)          | -6.4(8)         |
| C4   | 32.1(8)         | 39.2(8)         | 33.1(8)         | 4.7(6)          | -4.4(7)         | 0.2(7)          |
| C5   | 42.3(9)         | 38.4(8)         | 30.9(8)         | 5.9(7)          | -0.1(7)         | -1.6(7)         |
| C6   | 37.8(9)         | 39.9(8)         | 35.0(9)         | -0.9(7)         | 4.8(7)          | -6.9(7)         |
| C6A  | 32.8(8)         | 41.2(8)         | 35.9(8)         | -8.4(7)         | -0.5(7)         | 0.0(7)          |
| C7   | 32.6(9)         | 52.6(10)        | 43.4(10)        | -9.6(8)         | 0.7(8)          | 2.5(8)          |
| C8   | 40.1(10)        | 68.4(13)        | 49.0(11)        | -14.3(9)        | -9.8(9)         | 16.6(9)         |
| C9B  | 32.9(8)         | 36.5(8)         | 27.4(8)         | -3.2(6)         | 0.9(6)          | 5.2(7)          |
| C9A  | 40.4(9)         | 41.3(9)         | 30.6(8)         | -2.2(7)         | 3.4(7)          | 9.7(7)          |
| C9   | 56.2(12)        | 55.7(11)        | 35.7(9)         | -3.7(8)         | -4.0(9)         | 24.6(9)         |
| C11  | 31.0(8)         | 37.4(8)         | 45.1(10)        | 5.7(7)          | 0.4(7)          | 1.5(7)          |
| C12  | 70.6(15)        | 56.7(12)        | 80.8(16)        | 0.8(11)         | 26.2(12)        | 24.1(11)        |
| C13  | 41.2(9)         | 37.4(8)         | 38.1(9)         | 7.4(7)          | -0.4(8)         | 1.7(7)          |
| C14  | 67.9(14)        | 40.3(10)        | 80.3(15)        | -4.4(10)        | -2.9(12)        | -12.1(10)       |

**Table S4 Bond Lengths for 1.**

| Atom | Atom | Length/ $\text{\AA}$ | Atom | Atom | Length/ $\text{\AA}$ |
|------|------|----------------------|------|------|----------------------|
| O1   | C11  | 1.1942(19)           | C3A  | C4   | 1.546(2)             |
| O2   | C11  | 1.3414(19)           | C3A  | C9B  | 1.534(2)             |
| O2   | C12  | 1.439(2)             | C4   | C5   | 1.565(2)             |



| Atom | Atom | Length/Å   | Atom | Atom | Length/Å |
|------|------|------------|------|------|----------|
| O3   | C13  | 1.192(2)   | C4   | C11  | 1.504(2) |
| O4   | C13  | 1.329(2)   | C5   | C6   | 1.557(2) |
| O4   | C14  | 1.443(2)   | C5   | C13  | 1.502(2) |
| O10  | C7   | 1.440(2)   | C6   | C6A  | 1.528(2) |
| O10  | C9A  | 1.4537(19) | C6A  | C7   | 1.539(2) |
| O11  | C3A  | 1.4517(18) | C6A  | C9B  | 1.552(2) |
| O11  | C6   | 1.4311(18) | C7   | C8   | 1.529(2) |
| N2   | C1   | 1.458(2)   | C8   | C9   | 1.544(3) |
| N2   | C3   | 1.457(2)   | C9B  | C9A  | 1.539(2) |
| C1   | C9A  | 1.506(2)   | C9A  | C9   | 1.536(2) |
| C3A  | C3   | 1.510(2)   |      |      |          |

| Atom | Atom | Atom | Angle/°    | Atom | Atom | Atom | Angle/°    |
|------|------|------|------------|------|------|------|------------|
| C11  | O2   | C12  | 115.39(14) | C6   | C6A  | C9B  | 100.41(12) |
| C13  | O4   | C14  | 116.71(15) | C7   | C6A  | C9B  | 100.46(12) |
| C7   | O10  | C9A  | 96.83(11)  | O10  | C7   | C6A  | 103.61(13) |
| C6   | O11  | C3A  | 97.05(11)  | O10  | C7   | C8   | 101.73(14) |
| C3   | N2   | C1   | 112.49(13) | C8   | C7   | C6A  | 109.33(14) |
| N2   | C1   | C9A  | 114.73(13) | C7   | C8   | C9   | 101.72(14) |
| O11  | C3A  | C3   | 110.64(12) | C3A  | C9B  | C6A  | 102.49(12) |
| O11  | C3A  | C4   | 99.29(11)  | C3A  | C9B  | C9A  | 112.19(12) |
| O11  | C3A  | C9B  | 102.86(12) | C9A  | C9B  | C6A  | 102.49(12) |
| C3   | C3A  | C4   | 116.78(13) | O10  | C9A  | C1   | 110.17(13) |
| C3   | C3A  | C9B  | 113.88(13) | O10  | C9A  | C9B  | 102.85(12) |
| C9B  | C3A  | C4   | 111.45(12) | O10  | C9A  | C9   | 100.80(13) |
| N2   | C3   | C3A  | 114.75(14) | C1   | C9A  | C9B  | 114.07(14) |
| C3A  | C4   | C5   | 101.29(12) | C1   | C9A  | C9   | 118.66(14) |
| C11  | C4   | C3A  | 117.69(13) | C9   | C9A  | C9B  | 108.36(13) |
| C11  | C4   | C5   | 117.49(13) | C9A  | C9   | C8   | 101.62(14) |
| C6   | C5   | C4   | 100.72(12) | O1   | C11  | O2   | 122.38(16) |
| C13  | C5   | C4   | 116.78(14) | O1   | C11  | C4   | 127.08(15) |
| C13  | C5   | C6   | 114.37(14) | O2   | C11  | C4   | 110.35(14) |
| O11  | C6   | C5   | 101.12(12) | O3   | C13  | O4   | 122.71(16) |
| O11  | C6   | C6A  | 104.08(12) | O3   | C13  | C5   | 126.95(16) |
| C6A  | C6   | C5   | 110.47(13) | O4   | C13  | C5   | 110.32(14) |
| C6   | C6A  | C7   | 116.86(14) |      |      |      |            |

**Table S6 Hydrogen Bonds for 1.**

| D   | H    | A                | d(D-H)/Å | d(H-A)/Å | d(D-A)/Å   | D-H-A/°   |
|-----|------|------------------|----------|----------|------------|-----------|
| N2  | H2   | O10 <sup>1</sup> | 0.92(2)  | 2.19(2)  | 3.0028(19) | 146.4(17) |
| N2  | H2   | O11 <sup>1</sup> | 0.92(2)  | 2.52(2)  | 3.2331(19) | 135.0(15) |
| C4  | H4A  | O4 <sup>2</sup>  | 0.98     | 2.48     | 3.434(2)   | 163.1     |
| C8  | H8A  | O1 <sup>3</sup>  | 0.97     | 2.59     | 3.356(2)   | 136.1     |
| C9B | H9BA | O1               | 0.98     | 2.39     | 3.0533(19) | 124.1     |

<sup>1</sup>1-X,1-Y,1-Z; <sup>2</sup>-1/2+X,3/2-Y,1-Z; <sup>3</sup>1/2+X,+Y,3/2-Z

**Table S7 Torsion Angles for 1.**

| A   | B   | C   | D   | Angle/°     | A   | B   | C   | D   | Angle/°     |
|-----|-----|-----|-----|-------------|-----|-----|-----|-----|-------------|
| O10 | C7  | C8  | C9  | -34.22(16)  | C5  | C6  | C6A | C7  | 179.91(13)  |
| O10 | C9A | C9  | C8  | 35.63(15)   | C5  | C6  | C6A | C9B | 72.46(14)   |
| O11 | C3A | C3  | N2  | 66.94(17)   | C6  | O11 | C3A | C3  | -175.43(13) |
| O11 | C3A | C4  | C5  | -38.77(13)  | C6  | O11 | C3A | C4  | 61.23(13)   |
| O11 | C3A | C4  | C11 | -168.28(13) | C6  | O11 | C3A | C9B | -53.44(13)  |
| O11 | C3A | C9B | C6A | 31.45(14)   | C6  | C5  | C13 | O3  | -112.1(2)   |
| O11 | C3A | C9B | C9A | -77.80(14)  | C6  | C5  | C13 | O4  | 66.94(17)   |
| O11 | C6  | C6A | C7  | 72.09(17)   | C6  | C6A | C7  | O10 | -71.87(17)  |
| O11 | C6  | C6A | C9B | -35.36(14)  | C6  | C6A | C7  | C8  | -179.73(15) |
| N2  | C1  | C9A | O10 | -67.09(18)  | C6  | C6A | C9B | C3A | 1.80(14)    |
| N2  | C1  | C9A | C9B | 47.96(19)   | C6  | C6A | C9B | C9A | 118.25(12)  |
| N2  | C1  | C9A | C9  | 177.55(14)  | C6A | C7  | C8  | C9  | 74.90(16)   |
| C1  | N2  | C3  | C3A | 52.76(19)   | C6A | C9B | C9A | O10 | -31.86(14)  |
| C1  | C9A | C9  | C8  | 155.91(15)  | C6A | C9B | C9A | C1  | -151.14(13) |
| C3A | O11 | C6  | C5  | -58.95(13)  | C6A | C9B | C9A | C9  | 74.29(15)   |
| C3A | O11 | C6  | C6A | 55.69(14)   | C7  | O10 | C9A | C1  | 175.98(13)  |
| C3A | C4  | C5  | C6  | 3.90(14)    | C7  | O10 | C9A | C9B | 54.02(14)   |
| C3A | C4  | C5  | C13 | -120.57(14) | C7  | O10 | C9A | C9  | -57.84(14)  |
| C3A | C4  | C11 | O1  | 12.3(3)     | C7  | C6A | C9B | C3A | -118.26(12) |
| C3A | C4  | C11 | O2  | -162.83(14) | C7  | C6A | C9B | C9A | -1.82(14)   |
| C3A | C9B | C9A | O10 | 77.39(15)   | C7  | C8  | C9  | C9A | -1.11(16)   |
| C3A | C9B | C9A | C1  | -41.90(17)  | C9B | C3A | C3  | N2  | -48.34(19)  |
| C3A | C9B | C9A | C9  | -176.46(13) | C9B | C3A | C4  | C5  | 69.09(15)   |
| C3  | N2  | C1  | C9A | -52.6(2)    | C9B | C3A | C4  | C11 | -60.42(18)  |
| C3  | C3A | C4  | C5  | -157.63(13) | C9B | C6A | C7  | O10 | 35.54(15)   |

**Table S7 Torsion Angles for 1.**

| A  | B   | C   | D   | Angle/°     | A   | B   | C   | D   | Angle/°     |
|----|-----|-----|-----|-------------|-----|-----|-----|-----|-------------|
| C3 | C3A | C4  | C11 | 72.86(18)   | C9B | C6A | C7  | C8  | -72.31(16)  |
| C3 | C3A | C9B | C6A | 151.22(13)  | C9B | C9A | C9  | C8  | -71.94(16)  |
| C3 | C3A | C9B | C9A | 41.97(18)   | C9A | O10 | C7  | C6A | -56.02(14)  |
| C4 | C3A | C3  | N2  | 179.48(13)  | C9A | O10 | C7  | C8  | 57.44(14)   |
| C4 | C3A | C9B | C6A | -74.08(14)  | C11 | C4  | C5  | C6  | 133.54(14)  |
| C4 | C3A | C9B | C9A | 176.68(13)  | C11 | C4  | C5  | C13 | 9.1(2)      |
| C4 | C5  | C6  | O11 | 32.84(14)   | C12 | O2  | C11 | O1  | 10.1(3)     |
| C4 | C5  | C6  | C6A | -76.93(15)  | C12 | O2  | C11 | C4  | -174.59(16) |
| C4 | C5  | C13 | O3  | 5.2(3)      | C13 | C5  | C6  | O11 | 158.94(12)  |
| C4 | C5  | C13 | O4  | -175.84(14) | C13 | C5  | C6  | C6A | 49.18(17)   |
| C5 | C4  | C11 | O1  | -109.2(2)   | C14 | O4  | C13 | O3  | -4.6(3)     |
| C5 | C4  | C11 | O2  | 75.70(18)   | C14 | O4  | C13 | C5  | 176.39(16)  |

**Table S8 Hydrogen Atom Coordinates ( $\text{\AA} \times 10^4$ ) and Isotropic Displacement Parameters ( $\text{\AA}^2 \times 10^3$ ) for 1.**

| Atom | x        | y        | z        | U(eq) |
|------|----------|----------|----------|-------|
| H2   | 3630(30) | 4684(10) | 5301(10) | 60(6) |
| H1A  | 4763.4   | 4201.14  | 6217.28  | 56    |
| H1B  | 3487.65  | 4574.81  | 6683.87  | 56    |
| H3A  | 1380.5   | 5354.57  | 6078.72  | 49    |
| H3B  | 1518.81  | 5397.77  | 5286.77  | 49    |
| H4A  | 1525.33  | 6718.35  | 5396.61  | 42    |
| H5A  | 3390.66  | 7454.69  | 5109.83  | 45    |
| H6A  | 5895.4   | 6871.05  | 5075.09  | 45    |
| H6AA | 6089.74  | 6837.03  | 6380.89  | 44    |
| H7A  | 8107.61  | 6055.24  | 5711.97  | 51    |
| H8A  | 7918.59  | 6132.16  | 7017.28  | 63    |
| H8B  | 8847.53  | 5470.41  | 6719.16  | 63    |
| H9BA | 4030.31  | 6121.53  | 6779.9   | 39    |
| H9A  | 6830.07  | 4757.3   | 7074.57  | 59    |
| H9B  | 5918.78  | 5417.06  | 7386.19  | 59    |
| H12A | -1251.91 | 8102.3   | 6689.18  | 104   |
| H12B | -1167.4  | 7361.83  | 7042.27  | 104   |
| H12C | 219.67   | 7914.58  | 7160.75  | 104   |
| H14A | 6562.84  | 9107.21  | 5893.43  | 94    |
| H14B | 4828.44  | 9142.57  | 6219.48  | 94    |
| H14C | 6198.3   | 8696.75  | 6567.87  | 94    |

|                                             |                                                               |
|---------------------------------------------|---------------------------------------------------------------|
| Identification code                         | FZ1170_RT                                                     |
| Empirical formula                           | C <sub>16</sub> H <sub>21</sub> NO <sub>6</sub>               |
| Formula weight                              | 323.34                                                        |
| Temperature/K                               | 296(2)                                                        |
| Crystal system                              | triclinic                                                     |
| Space group                                 | P-1                                                           |
| a/Å                                         | 8.1315(6)                                                     |
| b/Å                                         | 13.2200(10)                                                   |
| c/Å                                         | 14.3234(9)                                                    |
| α/°                                         | 84.858(3)                                                     |
| β/°                                         | 89.157(3)                                                     |
| γ/°                                         | 89.327(3)                                                     |
| Volume/Å <sup>3</sup>                       | 1533.30(19)                                                   |
| Z                                           | 4                                                             |
| ρ <sub>calc</sub> /cm <sup>3</sup>          | 1.401                                                         |
| μ/mm <sup>-1</sup>                          | 0.107                                                         |
| F(000)                                      | 688.0                                                         |
| Crystal size/mm <sup>3</sup>                | 0.36 × 0.28 × 0.18                                            |
| Radiation                                   | MoKα (λ = 0.71073)                                            |
| 2θ range for data collection/°              | 7.548 to 54.998                                               |
| Index ranges                                | -10 ≤ h ≤ 10, -17 ≤ k ≤ 16, -18 ≤ l ≤ 15                      |
| Reflections collected                       | 23542                                                         |
| Independent reflections                     | 6992 [R <sub>int</sub> = 0.0623, R <sub>sigma</sub> = 0.0822] |
| Data/restraints/parameters                  | 6992/0/424                                                    |
| Goodness-of-fit on F <sup>2</sup>           | 1.002                                                         |
| Final R indexes [I ≥ 2σ (I)]                | R <sub>1</sub> = 0.0558, wR <sub>2</sub> = 0.1171             |
| Final R indexes [all data]                  | R <sub>1</sub> = 0.1167, wR <sub>2</sub> = 0.1409             |
| Largest diff. peak/hole / e Å <sup>-3</sup> | 0.22/-0.19                                                    |

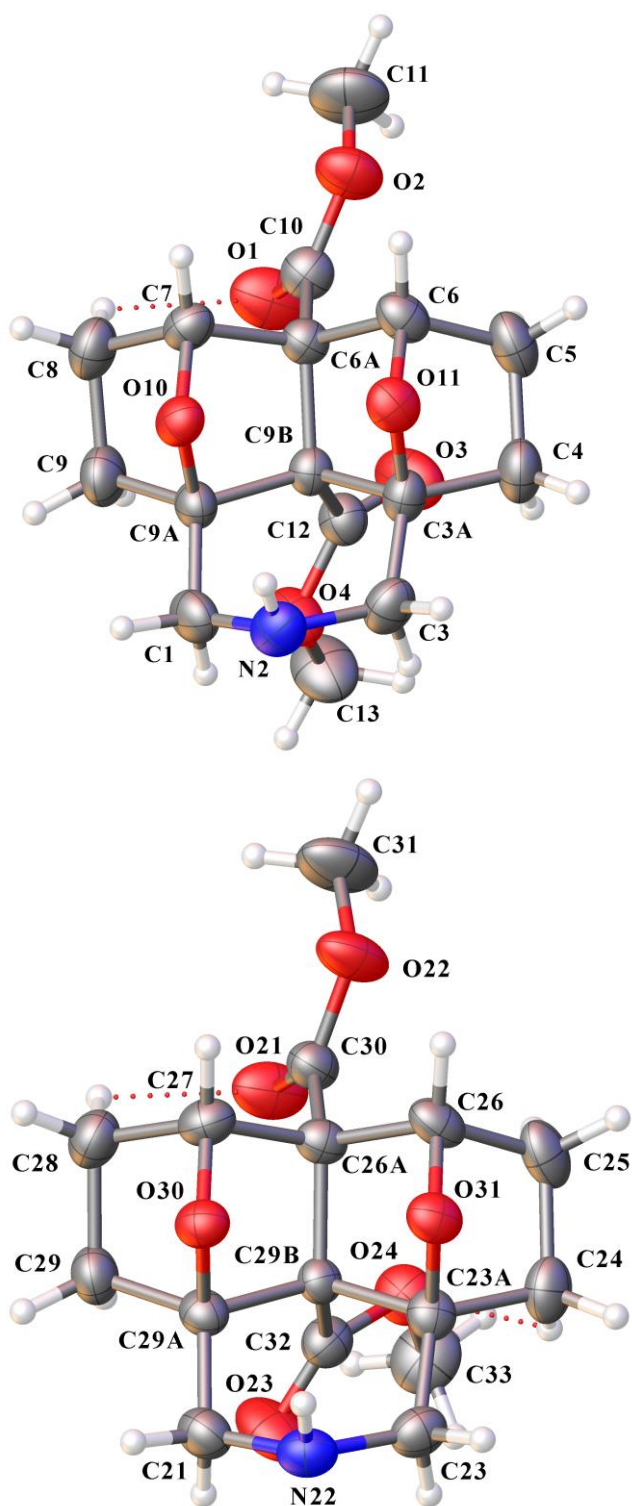

**2A**

**2B**

**Figure S3.** Two independent molecules **2A** and **2B** in the crystal packing of **2**

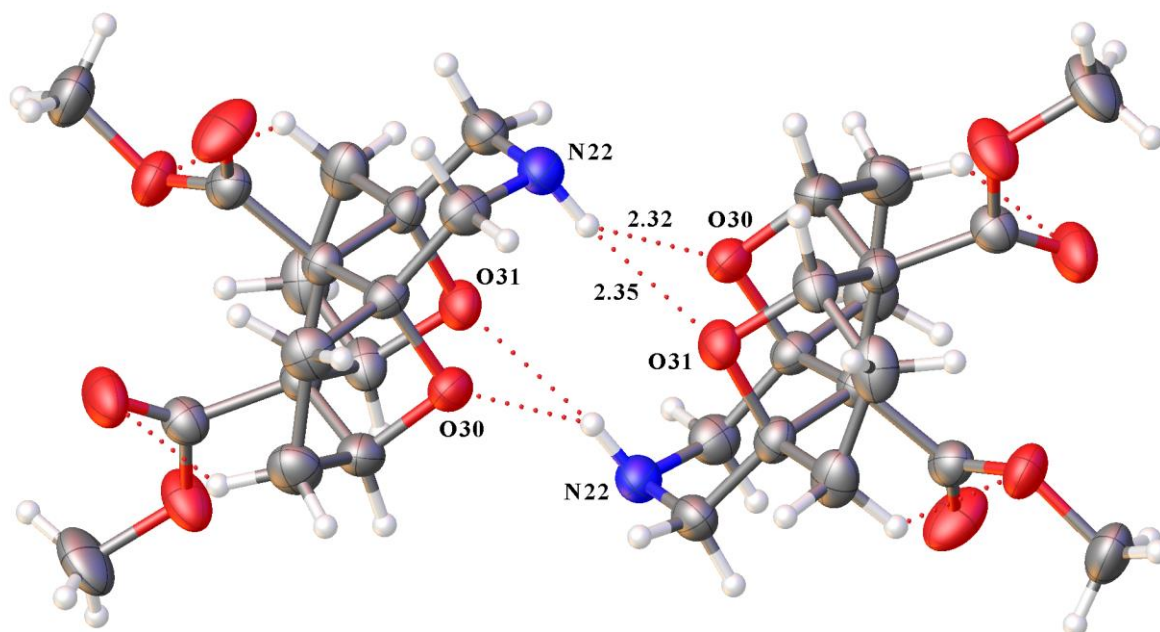

**Figure S4.** Dimer of two molecules **2A** and **2B** in the crystal packing of compound **2**

**Table S10 Fractional Atomic Coordinates ( $\times 10^4$ ) and Equivalent Isotropic Displacement Parameters ( $\text{\AA}^2 \times 10^3$ ) for **2**.  $U_{eq}$  is defined as 1/3 of the trace of the orthogonalised  $U_{ij}$  tensor.**

| Atom | <i>x</i>   | <i>y</i>   | <i>z</i>   | $U_{eq}$ |
|------|------------|------------|------------|----------|
| O1   | 1795(2)    | 6225.3(13) | 5471.7(13) | 63.8(6)  |
| O2   | -669(2)    | 6917.2(13) | 5200.3(12) | 53.5(5)  |
| O3   | 3045(2)    | 5988.5(13) | 3695.8(13) | 61.3(5)  |
| O4   | 5495(2)    | 6708.1(12) | 3723.5(12) | 51.6(5)  |
| O10  | 3116.2(19) | 9282.3(11) | 4627.4(10) | 38.8(4)  |
| O11  | 1292.9(19) | 8972.4(11) | 3196.7(10) | 41.6(4)  |
| N2   | 4894(3)    | 9559.4(17) | 2887.7(15) | 48.1(6)  |
| C1   | 5570(3)    | 9036.3(18) | 3739.4(17) | 45.5(6)  |
| C3   | 3924(3)    | 8873.3(19) | 2375.8(16) | 46.7(6)  |
| C3A  | 2585(3)    | 8293.4(17) | 2927.3(15) | 37.1(6)  |
| C4   | 1562(3)    | 7566(2)    | 2405.1(17) | 51.4(7)  |
| C5   | 36(3)      | 7434(2)    | 3049.0(18) | 52.9(7)  |
| C6   | 330(3)     | 8227.1(17) | 3747.3(16) | 40.8(6)  |
| C6A  | 1553(3)    | 7815.1(16) | 4505.0(15) | 33.7(5)  |
| C7   | 2047(3)    | 8626.0(17) | 5186.2(15) | 38.7(6)  |
| C8   | 3232(3)    | 8188(2)    | 5948.7(16) | 51.0(7)  |
| C9   | 4813(3)    | 8053(2)    | 5355.9(16) | 50.0(7)  |
| C9A  | 4295(3)    | 8517.7(17) | 4383.3(15) | 34.9(5)  |
| C9B  | 3177(3)    | 7775.9(16) | 3904.4(14) | 32.3(5)  |
| C10  | 958(3)     | 6877.0(18) | 5086.2(16) | 40.8(6)  |
| C11  | -1396(4)   | 6095(2)    | 5802(2)    | 71.2(9)  |

**Table S10 Fractional Atomic Coordinates ( $\times 10^4$ ) and Equivalent Isotropic Displacement Parameters ( $\text{\AA}^2 \times 10^3$ ) for 2.  $U_{eq}$  is defined as 1/3 of the trace of the orthogonalised  $U_{ij}$  tensor.**

| Atom | x          | y          | z           | U(eq)   |
|------|------------|------------|-------------|---------|
| C12  | 3860(3)    | 6721.8(18) | 3786.6(16)  | 39.5(6) |
| C13  | 6229(4)    | 5726(2)    | 3587(2)     | 67.7(9) |
| O21  | 7403(2)    | 9262.6(12) | 9505.0(11)  | 53.8(5) |
| O22  | 8084(2)    | 8556.0(12) | 10921.2(11) | 52.1(5) |
| O23  | 6544(2)    | 7803.4(15) | 7345.3(11)  | 61.1(5) |
| O24  | 8750(2)    | 8134.3(12) | 8145.0(10)  | 43.9(4) |
| O30  | 4474.7(18) | 6539.1(11) | 9888.6(9)   | 35.4(4) |
| O31  | 7424.7(18) | 5729.1(10) | 10038.2(10) | 36.2(4) |
| N22  | 5176(3)    | 5141.4(15) | 8502.7(15)  | 40.0(5) |
| C21  | 4297(3)    | 6099.2(17) | 8308.7(16)  | 40.3(6) |
| C23  | 6949(3)    | 5261.3(17) | 8461.7(16)  | 39.0(6) |
| C23A | 7645(3)    | 6033.9(16) | 9050.7(15)  | 32.8(5) |
| C24  | 9510(3)    | 6174.2(18) | 9021.3(17)  | 43.7(6) |
| C25  | 9783(3)    | 6704.4(18) | 9919.8(17)  | 46.8(7) |
| C26  | 8065(3)    | 6624.9(16) | 10383.3(16) | 37.7(6) |
| C26A | 6919(3)    | 7470.3(15) | 9940.4(14)  | 31.7(5) |
| C27  | 5105(3)    | 7387.6(17) | 10312.5(15) | 38.6(6) |
| C28  | 4017(3)    | 8247.0(18) | 9871.4(16)  | 45.2(6) |
| C29A | 4810(3)    | 6909.5(16) | 8925.2(14)  | 32.5(5) |
| C29B | 6691(3)    | 7093.6(15) | 8936.2(14)  | 28.0(5) |
| C29  | 3864(3)    | 7930.2(18) | 8860.9(16)  | 42.4(6) |
| C30  | 7514(3)    | 8528.6(17) | 10048.6(16) | 36.6(6) |
| C31  | 8522(4)    | 9542.3(19) | 11208.2(19) | 66.1(9) |
| C32  | 7287(3)    | 7723.4(16) | 8067.7(16)  | 35.7(5) |
| C33  | 9456(3)    | 8637(2)    | 7305.2(18)  | 57.5(7) |

**Table S11 Anisotropic Displacement Parameters ( $\text{\AA}^2 \times 10^3$ ) for 2. The Anisotropic displacement factor exponent takes the form:  $-2\pi^2[h^2a^*2U_{11}+2hka^*b^*U_{12}+\dots]$ .**

| Atom | U <sub>11</sub> | U <sub>22</sub> | U <sub>33</sub> | U <sub>23</sub> | U <sub>13</sub> | U <sub>12</sub> |
|------|-----------------|-----------------|-----------------|-----------------|-----------------|-----------------|
| O1   | 59.5(13)        | 47.0(11)        | 79.7(14)        | 22.0(10)        | 2.9(11)         | 5.4(10)         |
| O2   | 46.4(12)        | 47.4(11)        | 63.9(12)        | 9.9(9)          | 7.6(9)          | -8.2(9)         |
| O3   | 57.1(12)        | 35.0(10)        | 93.1(15)        | -13.7(10)       | 6.0(10)         | -7.8(9)         |
| O4   | 42.0(11)        | 40.9(10)        | 74.0(12)        | -16.4(9)        | -5.5(9)         | 5.9(8)          |
| O10  | 44.5(10)        | 33.9(9)         | 38.7(9)         | -7.9(7)         | 2.0(8)          | -3.9(7)         |
| O11  | 44.7(10)        | 35.1(9)         | 43.4(9)         | 6.2(7)          | -5.5(8)         | 2.0(8)          |

| <b>Table S11 Anisotropic Displacement Parameters (<math>\text{\AA}^2 \times 10^3</math>) for 2. The Anisotropic displacement factor exponent takes the form: <math>-2\pi^2[h^2a^{*2}U_{11}+2hka^*b^*U_{12}+\dots]</math>.</b> |                       |                       |                       |                       |                       |                       |
|-------------------------------------------------------------------------------------------------------------------------------------------------------------------------------------------------------------------------------|-----------------------|-----------------------|-----------------------|-----------------------|-----------------------|-----------------------|
| <b>Atom</b>                                                                                                                                                                                                                   | <b>U<sub>11</sub></b> | <b>U<sub>22</sub></b> | <b>U<sub>33</sub></b> | <b>U<sub>23</sub></b> | <b>U<sub>13</sub></b> | <b>U<sub>12</sub></b> |
| N2                                                                                                                                                                                                                            | 55.3(15)              | 40.8(13)              | 48.7(14)              | -5.6(11)              | 6.0(12)               | -11.2(12)             |
| C1                                                                                                                                                                                                                            | 41.0(15)              | 43.5(15)              | 54.3(16)              | -14.8(13)             | -1.6(13)              | -10.4(12)             |
| C3                                                                                                                                                                                                                            | 60.5(18)              | 45.9(15)              | 33.3(13)              | -1.5(11)              | 2.4(12)               | -7.0(13)              |
| C3A                                                                                                                                                                                                                           | 45.3(15)              | 35.0(13)              | 31.3(12)              | -3.4(10)              | -4.5(11)              | -3.4(11)              |
| C4                                                                                                                                                                                                                            | 60.1(19)              | 54.4(16)              | 41.2(14)              | -8.8(12)              | -12.7(13)             | -9.6(14)              |
| C5                                                                                                                                                                                                                            | 49.5(17)              | 52.2(16)              | 56.8(16)              | -0.2(13)              | -19.3(14)             | -11.7(13)             |
| C6                                                                                                                                                                                                                            | 34.1(14)              | 38.7(13)              | 48.1(14)              | 5.7(11)               | -4.3(11)              | -2.3(11)              |
| C6A                                                                                                                                                                                                                           | 33.8(13)              | 31.1(12)              | 35.4(12)              | 1.2(10)               | -0.8(10)              | -0.3(10)              |
| C7                                                                                                                                                                                                                            | 45.3(15)              | 36.2(13)              | 34.6(13)              | -3.1(10)              | 5.9(11)               | -3.3(11)              |
| C8                                                                                                                                                                                                                            | 64.6(19)              | 53.9(16)              | 34.8(14)              | -4.6(12)              | -7.4(13)              | -4.8(14)              |
| C9                                                                                                                                                                                                                            | 51.9(17)              | 58.7(17)              | 40.3(14)              | -7.1(12)              | -14.2(13)             | 2.6(13)               |
| C9A                                                                                                                                                                                                                           | 33.6(13)              | 36.6(13)              | 35.7(13)              | -8.5(10)              | -3.5(10)              | -2.4(10)              |
| C9B                                                                                                                                                                                                                           | 36.6(13)              | 29.1(12)              | 31.2(12)              | -1.6(10)              | -3.2(10)              | -0.6(10)              |
| C10                                                                                                                                                                                                                           | 45.7(16)              | 32.2(13)              | 43.8(14)              | 0.0(11)               | -0.4(12)              | -0.9(12)              |
| C11                                                                                                                                                                                                                           | 70(2)                 | 60.2(19)              | 79(2)                 | 13.6(16)              | 23.8(17)              | -18.1(16)             |
| C12                                                                                                                                                                                                                           | 41.8(16)              | 34.1(13)              | 43.0(14)              | -5.3(11)              | -3.4(12)              | -0.5(11)              |
| C13                                                                                                                                                                                                                           | 57.3(19)              | 52.1(17)              | 96(2)                 | -23.0(16)             | -8.7(17)              | 19.7(15)              |
| O21                                                                                                                                                                                                                           | 85.1(14)              | 30.6(9)               | 44.8(10)              | 3.5(8)                | -10.9(9)              | -4.9(9)               |
| O22                                                                                                                                                                                                                           | 74.6(13)              | 36.7(10)              | 46.3(10)              | -5.9(8)               | -24.3(9)              | -7.0(9)               |
| O23                                                                                                                                                                                                                           | 59.2(13)              | 86.6(15)              | 34.5(10)              | 14.7(9)               | -7.8(9)               | -13.8(10)             |
| O24                                                                                                                                                                                                                           | 44.5(11)              | 43.3(10)              | 42.0(10)              | 6.9(8)                | 5.0(8)                | -11.0(8)              |
| O30                                                                                                                                                                                                                           | 37.4(9)               | 36.6(9)               | 32.1(9)               | -3.4(7)               | 3.6(7)                | -5.6(7)               |
| O31                                                                                                                                                                                                                           | 45.2(10)              | 29.0(8)               | 33.3(9)               | 3.4(7)                | -4.4(7)               | -1.6(7)               |
| N22                                                                                                                                                                                                                           | 47.8(14)              | 37.4(12)              | 35.6(12)              | -5.7(10)              | 0.6(10)               | -7.7(10)              |
| C21                                                                                                                                                                                                                           | 37.0(14)              | 46.4(14)              | 37.9(13)              | -4.9(11)              | -4.4(11)              | -4.0(11)              |
| C23                                                                                                                                                                                                                           | 48.0(16)              | 31.4(12)              | 37.7(13)              | -4.7(10)              | 2.7(11)               | 1.7(11)               |
| C23A                                                                                                                                                                                                                          | 35.3(13)              | 29.6(12)              | 32.2(12)              | 3.9(10)               | 0.4(10)               | 0.3(10)               |
| C24                                                                                                                                                                                                                           | 37.1(15)              | 34.8(13)              | 57.4(16)              | 4.3(12)               | 1.8(12)               | 7.4(11)               |
| C25                                                                                                                                                                                                                           | 38.0(15)              | 38.0(14)              | 62.7(17)              | 7.2(12)               | -16.4(13)             | 1.6(11)               |
| C26                                                                                                                                                                                                                           | 45.1(15)              | 33.0(13)              | 34.8(12)              | 1.2(10)               | -13.8(11)             | -3.0(11)              |
| C26A                                                                                                                                                                                                                          | 37.0(13)              | 28.7(11)              | 29.5(12)              | -1.5(9)               | -3.5(10)              | -3.3(10)              |
| C27                                                                                                                                                                                                                           | 44.4(15)              | 38.5(13)              | 33.7(13)              | -7.7(10)              | 4.1(11)               | -3.3(11)              |
| C28                                                                                                                                                                                                                           | 40.6(15)              | 44.4(14)              | 51.3(15)              | -8.9(12)              | 3.5(12)               | 6.2(12)               |
| C29A                                                                                                                                                                                                                          | 33.0(13)              | 36.9(12)              | 27.1(12)              | -0.1(10)              | -0.3(10)              | -1.5(10)              |
| C29B                                                                                                                                                                                                                          | 28.1(12)              | 27.2(11)              | 28.2(11)              | 0.2(9)                | -1.6(9)               | 0.9(9)                |
| C29                                                                                                                                                                                                                           | 34.6(14)              | 45.4(14)              | 46.7(14)              | -2.1(11)              | -4.7(11)              | 6.4(11)               |
| C30                                                                                                                                                                                                                           | 39.2(14)              | 34.9(13)              | 36.2(13)              | -4.4(11)              | -6.2(11)              | 0.9(11)               |



| Atom | U <sub>11</sub> | U <sub>22</sub> | U <sub>33</sub> | U <sub>23</sub> | U <sub>13</sub> | U <sub>12</sub> |
|------|-----------------|-----------------|-----------------|-----------------|-----------------|-----------------|
| C31  | 92(2)           | 44.1(16)        | 65.7(18)        | -18.9(14)       | -27.2(17)       | -10.5(15)       |
| C32  | 40.1(15)        | 32.5(12)        | 33.6(13)        | 1.0(10)         | 1.2(11)         | 2.8(11)         |
| C33  | 62.4(19)        | 47.7(16)        | 59.6(17)        | 8.4(13)         | 16.3(14)        | -11.9(14)       |

| Atom | Atom | Length/ $\text{\AA}$ | Atom | Atom | Length/ $\text{\AA}$ |
|------|------|----------------------|------|------|----------------------|
| O1   | C10  | 1.193(3)             | O21  | C30  | 1.192(3)             |
| O2   | C10  | 1.332(3)             | O22  | C30  | 1.343(3)             |
| O2   | C11  | 1.451(3)             | O22  | C31  | 1.452(3)             |
| O3   | C12  | 1.198(3)             | O23  | C32  | 1.201(2)             |
| O4   | C12  | 1.331(3)             | O24  | C32  | 1.324(3)             |
| O4   | C13  | 1.450(3)             | O24  | C33  | 1.436(3)             |
| O10  | C7   | 1.422(3)             | O30  | C27  | 1.426(2)             |
| O10  | C9A  | 1.447(3)             | O30  | C29A | 1.445(2)             |
| O11  | C3A  | 1.444(3)             | O31  | C23A | 1.445(2)             |
| O11  | C6   | 1.438(3)             | O31  | C26  | 1.430(2)             |
| N2   | C1   | 1.459(3)             | N22  | C21  | 1.454(3)             |
| N2   | C3   | 1.462(3)             | N22  | C23  | 1.452(3)             |
| C1   | C9A  | 1.507(3)             | C21  | C29A | 1.514(3)             |
| C3   | C3A  | 1.511(3)             | C23  | C23A | 1.503(3)             |
| C3A  | C4   | 1.530(3)             | C23A | C24  | 1.529(3)             |
| C3A  | C9B  | 1.581(3)             | C23A | C29B | 1.590(3)             |
| C4   | C5   | 1.537(4)             | C24  | C25  | 1.540(3)             |
| C5   | C6   | 1.535(3)             | C25  | C26  | 1.539(3)             |
| C6   | C6A  | 1.542(3)             | C26  | C26A | 1.545(3)             |
| C6A  | C7   | 1.572(3)             | C26A | C27  | 1.562(3)             |
| C6A  | C9B  | 1.568(3)             | C26A | C29B | 1.578(3)             |
| C6A  | C10  | 1.511(3)             | C26A | C30  | 1.508(3)             |
| C7   | C8   | 1.537(3)             | C27  | C28  | 1.529(3)             |
| C8   | C9   | 1.547(4)             | C28  | C29  | 1.550(3)             |
| C9   | C9A  | 1.534(3)             | C29A | C29B | 1.552(3)             |
| C9A  | C9B  | 1.555(3)             | C29A | C29  | 1.542(3)             |
| C9B  | C12  | 1.517(3)             | C29B | C32  | 1.511(3)             |

**Table S13 Bond Angles for 2.**

| Atom | Atom | Atom | Angle/°    | Atom | Atom | Atom | Angle/°    |
|------|------|------|------------|------|------|------|------------|
| C10  | O2   | C11  | 116.1(2)   | C30  | O22  | C31  | 117.16(18) |
| C12  | O4   | C13  | 115.1(2)   | C32  | O24  | C33  | 116.58(19) |
| C7   | O10  | C9A  | 97.41(16)  | C27  | O30  | C29A | 97.31(16)  |
| C6   | O11  | C3A  | 97.16(16)  | C26  | O31  | C23A | 97.38(15)  |
| C1   | N2   | C3   | 111.29(19) | C23  | N22  | C21  | 112.56(19) |
| N2   | C1   | C9A  | 113.9(2)   | N22  | C21  | C29A | 113.34(17) |
| N2   | C3   | C3A  | 116.42(19) | N22  | C23  | C23A | 116.42(18) |
| O11  | C3A  | C3   | 110.86(18) | O31  | C23A | C23  | 111.16(18) |
| O11  | C3A  | C4   | 99.43(18)  | O31  | C23A | C24  | 99.31(16)  |
| O11  | C3A  | C9B  | 102.56(16) | O31  | C23A | C29B | 102.28(15) |
| C3   | C3A  | C4   | 117.20(19) | C23  | C23A | C24  | 117.48(19) |
| C3   | C3A  | C9B  | 113.40(19) | C23  | C23A | C29B | 112.98(17) |
| C4   | C3A  | C9B  | 111.46(19) | C24  | C23A | C29B | 111.68(18) |
| C3A  | C4   | C5   | 101.27(19) | C23A | C24  | C25  | 101.58(18) |
| C6   | C5   | C4   | 101.82(19) | C26  | C25  | C24  | 101.30(18) |
| O11  | C6   | C5   | 102.20(19) | O31  | C26  | C25  | 102.67(18) |
| O11  | C6   | C6A  | 102.29(17) | O31  | C26  | C26A | 102.80(16) |
| C5   | C6   | C6A  | 110.63(19) | C25  | C26  | C26A | 110.24(18) |
| C6   | C6A  | C7   | 113.38(18) | C26  | C26A | C27  | 113.49(18) |
| C6   | C6A  | C9B  | 100.59(17) | C26  | C26A | C29B | 100.34(16) |
| C9B  | C6A  | C7   | 99.85(17)  | C27  | C26A | C29B | 99.57(16)  |
| C10  | C6A  | C6   | 113.49(19) | C30  | C26A | C26  | 113.66(18) |
| C10  | C6A  | C7   | 108.51(18) | C30  | C26A | C27  | 108.40(18) |
| C10  | C6A  | C9B  | 120.33(18) | C30  | C26A | C29B | 120.66(18) |
| O10  | C7   | C6A  | 103.45(16) | O30  | C27  | C26A | 103.94(16) |
| O10  | C7   | C8   | 100.71(19) | O30  | C27  | C28  | 101.04(17) |
| C8   | C7   | C6A  | 112.27(18) | C28  | C27  | C26A | 111.95(19) |
| C7   | C8   | C9   | 100.63(18) | C27  | C28  | C29  | 100.89(17) |
| C9A  | C9   | C8   | 102.10(18) | O30  | C29A | C21  | 107.92(18) |
| O10  | C9A  | C1   | 107.69(18) | O30  | C29A | C29B | 101.93(15) |
| O10  | C9A  | C9   | 101.31(17) | O30  | C29A | C29  | 100.92(16) |
| O10  | C9A  | C9B  | 101.45(16) | C21  | C29A | C29B | 114.49(18) |
| C1   | C9A  | C9   | 119.0(2)   | C21  | C29A | C29  | 118.88(18) |
| C1   | C9A  | C9B  | 114.21(18) | C29  | C29A | C29B | 110.29(18) |
| C9   | C9A  | C9B  | 110.68(19) | C26A | C29B | C23A | 100.86(15) |
| C6A  | C9B  | C3A  | 101.08(17) | C29A | C29B | C23A | 109.69(17) |
| C9A  | C9B  | C3A  | 109.72(17) | C29A | C29B | C26A | 101.82(16) |
| C9A  | C9B  | C6A  | 101.77(16) | C32  | C29B | C23A | 110.44(17) |

| Atom | Atom | Atom | Angle/°    | Atom | Atom | Atom | Angle/°    |
|------|------|------|------------|------|------|------|------------|
| C12  | C9B  | C3A  | 109.96(17) | C32  | C29B | C26A | 120.83(18) |
| C12  | C9B  | C6A  | 115.57(19) | C32  | C29B | C29A | 112.23(17) |
| C12  | C9B  | C9A  | 117.32(18) | C29A | C29  | C28  | 101.82(17) |
| O1   | C10  | O2   | 122.9(2)   | O21  | C30  | O22  | 123.2(2)   |
| O1   | C10  | C6A  | 126.5(2)   | O21  | C30  | C26A | 128.0(2)   |
| O2   | C10  | C6A  | 110.3(2)   | O22  | C30  | C26A | 108.54(18) |
| O3   | C12  | O4   | 122.6(2)   | O23  | C32  | O24  | 122.1(2)   |
| O3   | C12  | C9B  | 125.0(2)   | O23  | C32  | C29B | 123.1(2)   |
| O4   | C12  | C9B  | 112.3(2)   | O24  | C32  | C29B | 114.61(18) |

| D   | H    | A                | d(D-H)/Å | d(H-A)/Å | d(D-A)/Å | D-H-A/° |
|-----|------|------------------|----------|----------|----------|---------|
| C1  | H1A  | O10 <sup>1</sup> | 0.97     | 2.62     | 3.552(3) | 161.0   |
| C1  | H1B  | O4               | 0.97     | 2.51     | 3.081(3) | 117.4   |
| C4  | H4A  | O3               | 0.97     | 2.32     | 2.922(3) | 119.7   |
| C8  | H8A  | O1               | 0.97     | 2.33     | 2.996(3) | 125.3   |
| C9  | H9B  | O4               | 0.97     | 2.55     | 3.102(3) | 115.8   |
| C11 | H11B | O3 <sup>2</sup>  | 0.96     | 2.62     | 3.099(3) | 111.5   |
| C13 | H13C | N22 <sup>3</sup> | 0.96     | 2.55     | 3.511(3) | 179.1   |
| N22 | H22  | O30 <sup>4</sup> | 0.90(3)  | 2.32(3)  | 3.068(3) | 140(2)  |
| N22 | H22  | O31 <sup>4</sup> | 0.90(3)  | 2.35(3)  | 3.108(3) | 141(2)  |
| C21 | H21B | O23              | 0.97     | 2.57     | 3.128(3) | 116.4   |
| C24 | H24A | O24              | 0.97     | 2.23     | 2.841(3) | 120.3   |
| C28 | H28A | O21              | 0.97     | 2.42     | 3.095(3) | 126.0   |
| C29 | H29B | O23              | 0.97     | 2.49     | 3.067(3) | 117.8   |
| C33 | H33C | O11 <sup>1</sup> | 0.96     | 2.44     | 3.231(3) | 140.0   |

<sup>1</sup>1-X,2-Y,1-Z; <sup>2</sup>1-X,1-Y,1-Z; <sup>3</sup>1-X,1-Y,1-Z; <sup>4</sup>1-X,1-Y,2-Z

| A   | B   | C   | D   | Angle/°     | A   | B    | C    | D    | Angle/°     |
|-----|-----|-----|-----|-------------|-----|------|------|------|-------------|
| O10 | C7  | C8  | C9  | -39.0(2)    | O30 | C27  | C28  | C29  | -38.1(2)    |
| O10 | C9A | C9B | C3A | 70.2(2)     | O30 | C29A | C29B | C23A | 70.84(18)   |
| O10 | C9A | C9B | C6A | -36.27(19)  | O30 | C29A | C29B | C26A | -35.38(18)  |
| O10 | C9A | C9B | C12 | -163.43(18) | O30 | C29A | C29B | C32  | -166.01(16) |
| O11 | C3A | C4  | C5  | -41.5(2)    | O30 | C29A | C29  | C28  | 31.9(2)     |

| <b>A</b> | <b>B</b> | <b>C</b> | <b>D</b> | <b>Angle/°</b> | <b>A</b> | <b>B</b> | <b>C</b> | <b>D</b> | <b>Angle/°</b> |
|----------|----------|----------|----------|----------------|----------|----------|----------|----------|----------------|
| O11      | C3A      | C9B      | C6A      | 29.10(19)      | O31      | C23A     | C24      | C25      | -41.5(2)       |
| O11      | C3A      | C9B      | C9A      | -77.8(2)       | O31      | C23A     | C29B     | C26A     | 29.65(19)      |
| O11      | C3A      | C9B      | C12      | 151.72(18)     | O31      | C23A     | C29B     | C29A     | -77.21(18)     |
| O11      | C6       | C6A      | C7       | 66.0(2)        | O31      | C23A     | C29B     | C32      | 158.58(17)     |
| O11      | C6       | C6A      | C9B      | -39.7(2)       | O31      | C26      | C26A     | C27      | 66.2(2)        |
| O11      | C6       | C6A      | C10      | -169.56(18)    | O31      | C26      | C26A     | C29B     | -39.1(2)       |
| N2       | C1       | C9A      | O10      | -58.2(2)       | O31      | C26      | C26A     | C30      | -169.33(18)    |
| N2       | C1       | C9A      | C9       | -172.5(2)      | N22      | C21      | C29A     | O30      | -60.3(2)       |
| N2       | C1       | C9A      | C9B      | 53.7(3)        | N22      | C21      | C29A     | C29B     | 52.4(3)        |
| N2       | C3       | C3A      | O11      | 67.2(3)        | N22      | C21      | C29A     | C29      | -174.3(2)      |
| N2       | C3       | C3A      | C4       | -179.6(2)      | N22      | C23      | C23A     | O31      | 66.5(2)        |
| N2       | C3       | C3A      | C9B      | -47.5(3)       | N22      | C23      | C23A     | C24      | 179.92(19)     |
| C1       | N2       | C3       | C3A      | 52.9(3)        | N22      | C23      | C23A     | C29B     | -47.8(3)       |
| C1       | C9A      | C9B      | C3A      | -45.4(2)       | C21      | N22      | C23      | C23A     | 53.0(3)        |
| C1       | C9A      | C9B      | C6A      | -151.80(18)    | C21      | C29A     | C29B     | C23A     | -45.4(2)       |
| C1       | C9A      | C9B      | C12      | 81.0(3)        | C21      | C29A     | C29B     | C26A     | -151.59(18)    |
| C3       | N2       | C1       | C9A      | -55.0(3)       | C21      | C29A     | C29B     | C32      | 77.8(2)        |
| C3       | C3A      | C4       | C5       | -160.9(2)      | C21      | C29A     | C29      | C28      | 149.5(2)       |
| C3       | C3A      | C9B      | C6A      | 148.70(18)     | C23      | N22      | C21      | C29A     | -53.9(3)       |
| C3       | C3A      | C9B      | C9A      | 41.8(2)        | C23      | C23A     | C24      | C25      | -161.32(19)    |
| C3       | C3A      | C9B      | C12      | -88.7(2)       | C23      | C23A     | C29B     | C26A     | 149.23(19)     |
| C3A      | O11      | C6       | C5       | -55.21(19)     | C23      | C23A     | C29B     | C29A     | 42.4(2)        |
| C3A      | O11      | C6       | C6A      | 59.38(19)      | C23      | C23A     | C29B     | C32      | -81.8(2)       |
| C3A      | C4       | C5       | C6       | 8.0(2)         | C23A     | O31      | C26      | C25      | -55.00(17)     |
| C3A      | C9B      | C12      | O3       | -76.7(3)       | C23A     | O31      | C26      | C26A     | 59.51(19)      |
| C3A      | C9B      | C12      | O4       | 98.6(2)        | C23A     | C24      | C25      | C26      | 8.4(2)         |
| C4       | C3A      | C9B      | C6A      | -76.4(2)       | C23A     | C29B     | C32      | O23      | 101.3(2)       |
| C4       | C3A      | C9B      | C9A      | 176.64(19)     | C23A     | C29B     | C32      | O24      | -74.8(2)       |
| C4       | C3A      | C9B      | C12      | 46.2(3)        | C24      | C23A     | C29B     | C26A     | -75.7(2)       |
| C4       | C5       | C6       | O11      | 28.2(2)        | C24      | C23A     | C29B     | C29A     | 177.44(17)     |
| C4       | C5       | C6       | C6A      | -80.1(2)       | C24      | C23A     | C29B     | C32      | 53.2(2)        |
| C5       | C6       | C6A      | C7       | 174.28(19)     | C24      | C25      | C26      | O31      | 27.8(2)        |
| C5       | C6       | C6A      | C9B      | 68.6(2)        | C24      | C25      | C26      | C26A     | -81.2(2)       |
| C5       | C6       | C6A      | C10      | -61.3(3)       | C25      | C26      | C26A     | C27      | 175.06(17)     |
| C6       | O11      | C3A      | C3       | -175.77(17)    | C25      | C26      | C26A     | C29B     | 69.8(2)        |
| C6       | O11      | C3A      | C4       | 60.23(19)      | C25      | C26      | C26A     | C30      | -60.4(2)       |
| C6       | O11      | C3A      | C9B      | -54.41(18)     | C26      | O31      | C23A     | C23      | -175.60(18)    |
| C6       | C6A      | C7       | O10      | -73.7(2)       | C26      | O31      | C23A     | C24      | 60.00(17)      |

| <b>A</b> | <b>B</b> | <b>C</b> | <b>D</b> | <b>Angle/°</b> | <b>A</b> | <b>B</b> | <b>C</b> | <b>D</b> | <b>Angle/°</b> |
|----------|----------|----------|----------|----------------|----------|----------|----------|----------|----------------|
| C6       | C6A      | C7       | C8       | 178.6(2)       | C26      | O31      | C23A     | C29B     | -54.76(18)     |
| C6       | C6A      | C9B      | C3A      | 5.88(19)       | C26      | C26A     | C27      | O30      | -72.8(2)       |
| C6       | C6A      | C9B      | C9A      | 118.96(17)     | C26      | C26A     | C27      | C28      | 178.99(17)     |
| C6       | C6A      | C9B      | C12      | -112.76(19)    | C26      | C26A     | C29B     | C23A     | 5.0(2)         |
| C6       | C6A      | C10      | O1       | 152.6(2)       | C26      | C26A     | C29B     | C29A     | 118.02(18)     |
| C6       | C6A      | C10      | O2       | -34.0(3)       | C26      | C26A     | C29B     | C32      | -116.9(2)      |
| C6A      | C7       | C8       | C9       | 70.4(2)        | C26      | C26A     | C30      | O21      | 144.0(2)       |
| C6A      | C9B      | C12      | O3       | 36.9(3)        | C26      | C26A     | C30      | O22      | -41.9(3)       |
| C6A      | C9B      | C12      | O4       | -147.81(19)    | C26A     | C27      | C28      | C29      | 72.0(2)        |
| C7       | O10      | C9A      | C1       | 177.92(17)     | C26A     | C29B     | C32      | O23      | -141.6(2)      |
| C7       | O10      | C9A      | C9       | -56.41(19)     | C26A     | C29B     | C32      | O24      | 42.4(3)        |
| C7       | O10      | C9A      | C9B      | 57.67(18)      | C27      | O30      | C29A     | C21      | 177.73(18)     |
| C7       | C6A      | C9B      | C3A      | -110.37(17)    | C27      | O30      | C29A     | C29B     | 56.83(17)      |
| C7       | C6A      | C9B      | C9A      | 2.71(19)       | C27      | O30      | C29A     | C29      | -56.86(18)     |
| C7       | C6A      | C9B      | C12      | 130.99(18)     | C27      | C26A     | C29B     | C23A     | -111.18(17)    |
| C7       | C6A      | C10      | O1       | -80.4(3)       | C27      | C26A     | C29B     | C29A     | 1.81(19)       |
| C7       | C6A      | C10      | O2       | 93.0(2)        | C27      | C26A     | C29B     | C32      | 126.9(2)       |
| C7       | C8       | C9       | C9A      | 4.5(2)         | C27      | C26A     | C30      | O21      | -88.8(3)       |
| C8       | C9       | C9A      | O10      | 30.6(2)        | C27      | C26A     | C30      | O22      | 85.3(2)        |
| C8       | C9       | C9A      | C1       | 148.4(2)       | C27      | C28      | C29      | C29A     | 3.3(2)         |
| C8       | C9       | C9A      | C9B      | -76.4(2)       | C29A     | O30      | C27      | C26A     | -56.49(18)     |
| C9       | C9A      | C9B      | C3A      | 177.06(19)     | C29A     | O30      | C27      | C28      | 59.67(19)      |
| C9       | C9A      | C9B      | C6A      | 70.6(2)        | C29A     | C29B     | C32      | O23      | -21.5(3)       |
| C9       | C9A      | C9B      | C12      | -56.5(3)       | C29A     | C29B     | C32      | O24      | 162.49(18)     |
| C9A      | O10      | C7       | C6A      | -56.50(18)     | C29B     | C23A     | C24      | C25      | 65.8(2)        |
| C9A      | O10      | C7       | C8       | 59.72(18)      | C29B     | C26A     | C27      | O30      | 32.98(19)      |
| C9A      | C9B      | C12      | O3       | 157.1(2)       | C29B     | C26A     | C27      | C28      | -75.2(2)       |
| C9A      | C9B      | C12      | O4       | -27.7(3)       | C29B     | C26A     | C30      | O21      | 24.8(4)        |
| C9B      | C3A      | C4       | C5       | 66.1(2)        | C29B     | C26A     | C30      | O22      | -161.04(19)    |
| C9B      | C6A      | C7       | O10      | 32.43(19)      | C29B     | C29A     | C29      | C28      | -75.3(2)       |
| C9B      | C6A      | C7       | C8       | -75.3(2)       | C29      | C29A     | C29B     | C23A     | 177.37(16)     |
| C9B      | C6A      | C10      | O1       | 33.5(3)        | C29      | C29A     | C29B     | C26A     | 71.16(19)      |
| C9B      | C6A      | C10      | O2       | -153.10(18)    | C29      | C29A     | C29B     | C32      | -59.5(2)       |
| C10      | C6A      | C7       | O10      | 159.21(18)     | C30      | C26A     | C27      | O30      | 159.93(16)     |
| C10      | C6A      | C7       | C8       | 51.5(3)        | C30      | C26A     | C27      | C28      | 51.7(2)        |
| C10      | C6A      | C9B      | C3A      | 131.3(2)       | C30      | C26A     | C29B     | C23A     | 130.6(2)       |
| C10      | C6A      | C9B      | C9A      | -115.6(2)      | C30      | C26A     | C29B     | C29A     | -116.4(2)      |
| C10      | C6A      | C9B      | C12      | 12.6(3)        | C30      | C26A     | C29B     | C32      | 8.7(3)         |

| <b>A</b> | <b>B</b> | <b>C</b> | <b>D</b> | <b>Angle/°</b> | <b>A</b> | <b>B</b> | <b>C</b> | <b>D</b> | <b>Angle/°</b> |
|----------|----------|----------|----------|----------------|----------|----------|----------|----------|----------------|
| C11      | O2       | C10      | O1       | -2.1(3)        | C31      | O22      | C30      | O21      | 2.2(4)         |
| C11      | O2       | C10      | C6A      | -175.8(2)      | C31      | O22      | C30      | C26A     | -172.3(2)      |
| C13      | O4       | C12      | O3       | -3.2(3)        | C33      | O24      | C32      | O23      | -3.3(3)        |
| C13      | O4       | C12      | C9B      | -178.57(19)    | C33      | O24      | C32      | C29B     | 172.74(18)     |

| <b>Atom</b> | <b>x</b> | <b>y</b>  | <b>z</b> | <b>U(eq)</b> |
|-------------|----------|-----------|----------|--------------|
| H2          | 4290(30) | 10010(20) | 3041(19) | 61(10)       |
| H1A         | 6146.35  | 9524.53   | 4077.69  | 55           |
| H1B         | 6368.02  | 8532.85   | 3565.34  | 55           |
| H3A         | 4668.55  | 8385.61   | 2122.08  | 56           |
| H3B         | 3421.34  | 9267.51   | 1849.24  | 56           |
| H4A         | 2134.61  | 6924.86   | 2354.25  | 62           |
| H4B         | 1276.63  | 7862.24   | 1783.81  | 62           |
| H5A         | -968.58  | 7578.12   | 2703.17  | 63           |
| H5B         | -12.75   | 6753.47   | 3362.9   | 63           |
| H6A         | -686.65  | 8503.74   | 4003.89  | 49           |
| H7A         | 1097.97  | 8981.31   | 5438.09  | 46           |
| H8A         | 2850.72  | 7544.06   | 6247.7   | 61           |
| H8B         | 3394.11  | 8657.47   | 6421.22  | 61           |
| H9A         | 5727.32  | 8416.77   | 5590.21  | 60           |
| H9B         | 5112.74  | 7342.14   | 5345.89  | 60           |
| H11A        | -2565.7  | 6196.02   | 5836.68  | 107          |
| H11B        | -1158.36 | 5460.54   | 5548.24  | 107          |
| H11C        | -945.25  | 6084.61   | 6418.26  | 107          |
| H13A        | 7403.54  | 5787.05   | 3549.19  | 102          |
| H13B        | 5934.82  | 5248.07   | 4104.74  | 102          |
| H13C        | 5833.24  | 5494.02   | 3015.79  | 102          |
| H22         | 4890(30) | 4860(20)  | 9078(19) | 70(9)        |
| H21A        | 3127.23  | 5982.09   | 8396.76  | 48           |
| H21B        | 4483.84  | 6345.17   | 7657.68  | 48           |
| H23A        | 7270.59  | 5443.55   | 7814.14  | 47           |
| H23B        | 7454.53  | 4608.06   | 8650.84  | 47           |
| H24A        | 9856.67  | 6597.27   | 8466.71  | 52           |
| H24B        | 10087.57 | 5526.74   | 9040.61  | 52           |
| H25A        | 10608.88 | 6352.66   | 10312.47 | 56           |

**Table S16 Hydrogen Atom Coordinates ( $\text{\AA} \times 10^4$ ) and Isotropic Displacement Parameters ( $\text{\AA}^2 \times 10^3$ ) for 2.**

| Atom | x        | y       | z        | U(eq) |
|------|----------|---------|----------|-------|
| H25B | 10101.34 | 7406.66 | 9776.74  | 56    |
| H26A | 8088.74  | 6592.99 | 11069.2  | 45    |
| H27A | 5024.09  | 7309.83 | 10998.45 | 46    |
| H28A | 4540.34  | 8901.86 | 9877.49  | 54    |
| H28B | 2953.46  | 8266.91 | 10185.46 | 54    |
| H29A | 2723.48  | 7844.91 | 8697.93  | 51    |
| H29B | 4370.38  | 8422.98 | 8405.93  | 51    |
| H31A | 8910.75  | 9464.91 | 11840.55 | 99    |
| H31B | 9373     | 9832.13 | 10799.72 | 99    |
| H31C | 7573.32  | 9982.13 | 11174.09 | 99    |
| H33A | 10508.86 | 8904.31 | 7442.05  | 86    |
| H33B | 9587.67  | 8159.99 | 6841.38  | 86    |
| H33C | 8741.56  | 9181.88 | 7070.89  | 86    |

**Table S17 Crystal data and structure refinement for 3.**

|                                               |                                                              |
|-----------------------------------------------|--------------------------------------------------------------|
| Identification code                           | 3_FM_LT                                                      |
| Empirical formula                             | $\text{C}_{20}\text{H}_{18}\text{N}_2\text{O}_4$             |
| Formula weight                                | 350.36                                                       |
| Temperature/K                                 | 100(2)                                                       |
| Crystal system                                | monoclinic                                                   |
| Space group                                   | $P2_1/c$                                                     |
| a/ $\text{\AA}$                               | 9.4849(10)                                                   |
| b/ $\text{\AA}$                               | 8.8446(9)                                                    |
| c/ $\text{\AA}$                               | 19.102(2)                                                    |
| $\alpha/^\circ$                               | 90                                                           |
| $\beta/^\circ$                                | 95.807(4)                                                    |
| $\gamma/^\circ$                               | 90                                                           |
| Volume/ $\text{\AA}^3$                        | 1594.2(3)                                                    |
| Z                                             | 4                                                            |
| $\rho_{\text{calc}}/\text{g cm}^{-3}$         | 1.460                                                        |
| $\mu/\text{mm}^{-1}$                          | 0.103                                                        |
| F(000)                                        | 736.0                                                        |
| Crystal size/ $\text{mm}^3$                   | $0.14 \times 0.12 \times 0.04$                               |
| Radiation                                     | $\text{MoK}\alpha$ ( $\lambda = 0.71073$ )                   |
| $2\theta$ range for data collection/ $^\circ$ | 6.808 to 54.99                                               |
| Index ranges                                  | $-12 \leq h \leq 12, -11 \leq k \leq 11, -24 \leq l \leq 24$ |
| Reflections collected                         | 44419                                                        |

|                                                |                                                                  |
|------------------------------------------------|------------------------------------------------------------------|
| Independent reflections                        | 3653 [ $R_{\text{int}} = 0.1114$ , $R_{\text{sigma}} = 0.0609$ ] |
| Data/restraints/parameters                     | 3653/0/239                                                       |
| Goodness-of-fit on $F^2$                       | 1.032                                                            |
| Final R indexes [ $I \geq 2\sigma(I)$ ]        | $R_1 = 0.0530$ , $wR_2 = 0.1082$                                 |
| Final R indexes [all data]                     | $R_1 = 0.1071$ , $wR_2 = 0.1296$                                 |
| Largest diff. peak/hole / $e \text{ \AA}^{-3}$ | 0.47/-0.23                                                       |

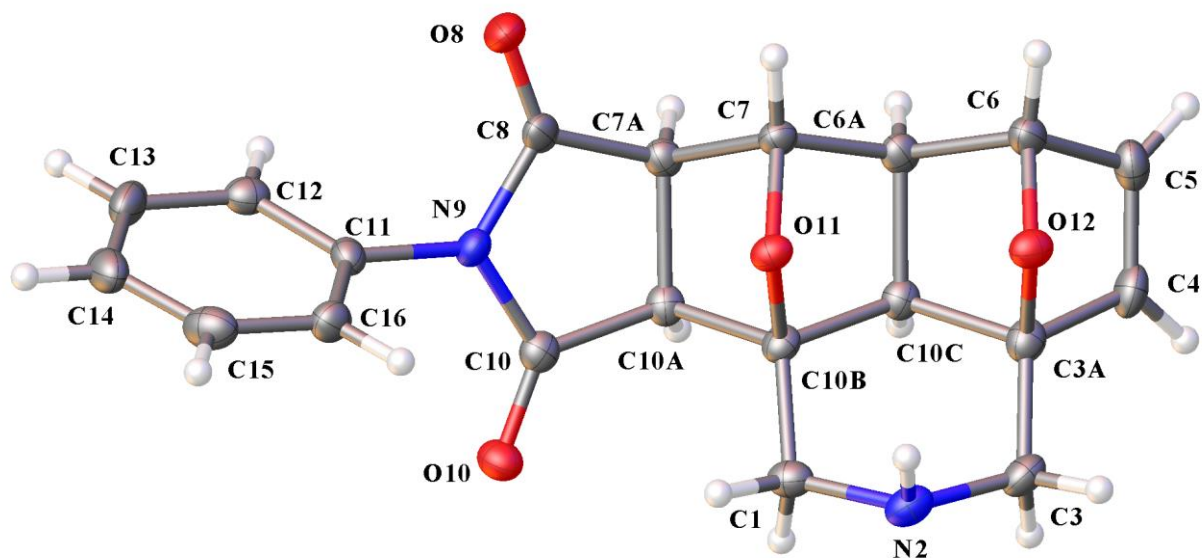

**Figure S5.** Molecule of **3**

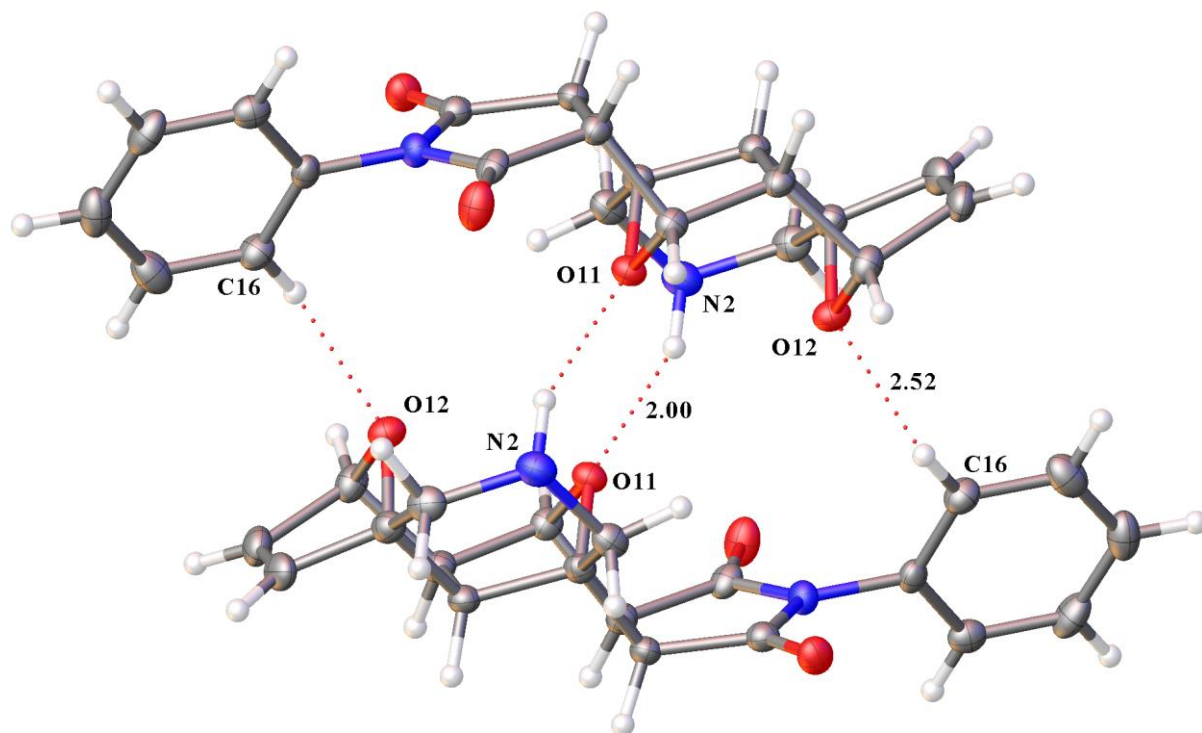

**Figure S6.** Dimer in the crystal packing of compound **3**



**Table S18 Fractional Atomic Coordinates ( $\times 10^4$ ) and Equivalent Isotropic Displacement Parameters ( $\text{\AA}^2 \times 10^3$ ) for 3.  $U_{eq}$  is defined as 1/3 of the trace of the orthogonalised  $U_{ij}$  tensor.**

| Atom | x          | y          | z          | U(eq)   |
|------|------------|------------|------------|---------|
| O8   | 5535.5(16) | 5321(2)    | 7587.2(8)  | 28.0(4) |
| O10  | 2721.3(16) | 8438.3(18) | 6146.9(8)  | 23.9(4) |
| O11  | 5853.8(15) | 5959.0(17) | 5707.4(8)  | 17.9(3) |
| O12  | 7910.8(16) | 5992.5(17) | 4806.9(8)  | 20.7(4) |
| N2   | 5060(2)    | 7148(2)    | 4235.4(10) | 23.3(5) |
| N9   | 3867.5(18) | 6798(2)    | 6950.7(9)  | 17.9(4) |
| C1   | 4559(2)    | 7701(3)    | 4888.5(11) | 21.3(5) |
| C3   | 6425(2)    | 7782(3)    | 4086.8(12) | 23.1(5) |
| C3A  | 7575(2)    | 7581(3)    | 4680.4(12) | 21.2(5) |
| C4   | 9043(2)    | 8246(3)    | 4662.7(12) | 25.7(5) |
| C5   | 9897(3)    | 7436(3)    | 5104.9(12) | 25.7(6) |
| C6   | 8960(2)    | 6230(3)    | 5395.6(11) | 21.8(5) |
| C6A  | 8099(2)    | 7086(3)    | 5925.3(11) | 19.2(5) |
| C7   | 6988(2)    | 6158(3)    | 6266.0(11) | 17.8(5) |
| C7A  | 6263(2)    | 7207(3)    | 6770.7(11) | 18.3(5) |
| C8   | 5245(2)    | 6312(3)    | 7164.4(11) | 19.8(5) |
| C10  | 3806(2)    | 7877(2)    | 6417.5(12) | 19.1(5) |
| C10A | 5299(2)    | 8199(3)    | 6248.3(11) | 18.1(5) |
| C10B | 5636(2)    | 7538(2)    | 5530.6(11) | 17.5(5) |
| C10C | 7129(2)    | 8077(3)    | 5411.3(11) | 17.9(5) |
| C11  | 2640(2)    | 6236(2)    | 7254.2(11) | 18.2(5) |
| C12  | 2497(2)    | 6554(3)    | 7960.0(12) | 21.9(5) |
| C13  | 1329(3)    | 6013(3)    | 8248.4(13) | 28.5(6) |
| C14  | 298(3)     | 5155(3)    | 7847.9(13) | 30.0(6) |
| C15  | 479(3)     | 4832(3)    | 7150.7(13) | 29.6(6) |
| C16  | 1643(2)    | 5374(3)    | 6850.7(12) | 22.3(5) |

**Table S19 Anisotropic Displacement Parameters ( $\text{\AA}^2 \times 10^3$ ) for 3\_FM\_LT. The Anisotropic displacement factor exponent takes the form:  $-2\pi^2[h^2a^*{}^2U_{11}+2hka^*b^*U_{12}+\dots]$ .**

| Atom | U <sub>11</sub> | U <sub>22</sub> | U <sub>33</sub> | U <sub>23</sub> | U <sub>13</sub> | U <sub>12</sub> |
|------|-----------------|-----------------|-----------------|-----------------|-----------------|-----------------|
| O8   | 25.4(9)         | 37.2(10)        | 22.1(9)         | 11.1(8)         | 5.4(7)          | 6.0(8)          |
| O10  | 20.9(8)         | 22.2(9)         | 28.3(9)         | 3.6(7)          | 1.8(7)          | 2.9(7)          |
| O11  | 20.6(8)         | 16.0(8)         | 16.5(8)         | 1.1(6)          | -0.6(6)         | -1.8(6)         |
| O12  | 24.8(8)         | 19.2(8)         | 17.9(8)         | -1.1(7)         | 0.7(6)          | 2.8(7)          |
| N2   | 29.4(11)        | 21.4(11)        | 18.3(10)        | 2.0(9)          | -1.0(8)         | -2.1(9)         |

**Table S19 Anisotropic Displacement Parameters ( $\text{\AA}^2 \times 10^3$ ) for 3\_FM\_LT. The Anisotropic displacement factor exponent takes the form:  $-2\pi^2[h^2a^*2U_{11}+2hka^*b^*U_{12}+\dots]$ .**

| Atom | U <sub>11</sub> | U <sub>22</sub> | U <sub>33</sub> | U <sub>23</sub> | U <sub>13</sub> | U <sub>12</sub> |
|------|-----------------|-----------------|-----------------|-----------------|-----------------|-----------------|
| N9   | 19.3(9)         | 20.1(10)        | 14.7(9)         | 2.4(8)          | 3.3(7)          | -0.9(8)         |
| C1   | 21.2(12)        | 19.7(12)        | 22.0(12)        | 2.8(10)         | -1.9(9)         | -0.2(10)        |
| C3   | 31.3(13)        | 22.4(13)        | 16.0(11)        | 3.0(10)         | 3.4(9)          | 0.2(10)         |
| C3A  | 24.9(12)        | 19.1(12)        | 20.2(12)        | -0.2(10)        | 5.2(9)          | 0.1(10)         |
| C4   | 29.7(13)        | 25.9(13)        | 23.4(13)        | 0.6(11)         | 12.9(10)        | -4.4(11)        |
| C5   | 20.8(12)        | 32.5(14)        | 25.1(13)        | -3.3(11)        | 8.9(10)         | -2.1(11)        |
| C6   | 19.5(11)        | 28.6(13)        | 17.5(12)        | -0.6(10)        | 2.3(9)          | 3.1(10)         |
| C6A  | 19.5(11)        | 21.4(12)        | 16.5(11)        | -3.6(10)        | 1.3(9)          | -0.1(9)         |
| C7   | 18.0(11)        | 20.2(12)        | 14.9(11)        | 0.0(9)          | -0.2(8)         | 0.8(9)          |
| C7A  | 17.1(11)        | 19.8(12)        | 17.8(11)        | -2.0(9)         | 1.0(9)          | 0.2(9)          |
| C8   | 20.0(11)        | 26.7(13)        | 12.7(11)        | -3.0(10)        | 2.1(9)          | 2.4(10)         |
| C10  | 21.5(12)        | 17.4(11)        | 18.6(11)        | -1.8(10)        | 2.6(9)          | -0.5(9)         |
| C10A | 19.3(11)        | 15.2(11)        | 20.2(11)        | -1.6(9)         | 3.7(9)          | -1.5(9)         |
| C10B | 21.3(11)        | 14.3(11)        | 16.9(11)        | 1.7(9)          | 2.8(9)          | -0.3(9)         |
| C10C | 20.2(11)        | 16.3(12)        | 17.5(11)        | -1.9(9)         | 2.7(9)          | -1.0(9)         |
| C11  | 16.1(11)        | 18.2(12)        | 20.8(11)        | 2.5(9)          | 4.8(9)          | 3.2(9)          |
| C12  | 23.9(12)        | 20.0(12)        | 21.0(12)        | 0.1(10)         | -0.9(9)         | 3.8(10)         |
| C13  | 33.1(14)        | 34.6(14)        | 19.5(12)        | 5.0(11)         | 10.7(10)        | 10.7(12)        |
| C14  | 22.8(13)        | 35.1(15)        | 33.3(14)        | 12.7(12)        | 8.1(11)         | 3.2(11)         |
| C15  | 24.5(13)        | 28.9(14)        | 33.9(14)        | 6.2(12)         | -4.2(11)        | -3.8(11)        |
| C16  | 23.7(12)        | 26.1(13)        | 17.3(11)        | -1.4(10)        | 2.2(9)          | 2.2(10)         |

**Table S20 Bond Lengths for 3.**

| Atom | Atom | Length/ $\text{\AA}$ | Atom | Atom | Length/ $\text{\AA}$ |
|------|------|----------------------|------|------|----------------------|
| O8   | C8   | 1.205(3)             | C5   | C6   | 1.528(3)             |
| O10  | C10  | 1.210(3)             | C6   | C6A  | 1.559(3)             |
| O11  | C7   | 1.447(2)             | C6A  | C7   | 1.532(3)             |
| O11  | C10B | 1.447(3)             | C6A  | C10C | 1.548(3)             |
| O12  | C3A  | 1.455(3)             | C7   | C7A  | 1.548(3)             |
| O12  | C6   | 1.440(3)             | C7A  | C8   | 1.507(3)             |
| N2   | C1   | 1.463(3)             | C7A  | C10A | 1.555(3)             |
| N2   | C3   | 1.465(3)             | C10  | C10A | 1.511(3)             |
| N9   | C8   | 1.396(3)             | C10A | C10B | 1.553(3)             |
| N9   | C10  | 1.392(3)             | C10B | C10C | 1.533(3)             |
| N9   | C11  | 1.441(3)             | C11  | C12  | 1.397(3)             |
| C1   | C10B | 1.522(3)             | C11  | C16  | 1.386(3)             |

| Atom | Atom | Length/Å | Atom | Atom | Length/Å |
|------|------|----------|------|------|----------|
| C3   | C3A  | 1.502(3) | C12  | C13  | 1.372(3) |
| C3A  | C4   | 1.515(3) | C13  | C14  | 1.402(4) |
| C3A  | C10C | 1.562(3) | C14  | C15  | 1.390(4) |
| C4   | C5   | 1.321(3) | C15  | C16  | 1.380(3) |

| Atom | Atom | Atom | Angle/°    | Atom | Atom | Atom | Angle/°    |
|------|------|------|------------|------|------|------|------------|
| C10B | O11  | C7   | 97.62(15)  | C8   | C7A  | C10A | 104.55(17) |
| C6   | O12  | C3A  | 96.38(16)  | O8   | C8   | N9   | 124.3(2)   |
| C1   | N2   | C3   | 114.03(18) | O8   | C8   | C7A  | 127.0(2)   |
| C8   | N9   | C11  | 123.14(18) | N9   | C8   | C7A  | 108.71(18) |
| C10  | N9   | C8   | 113.15(18) | O10  | C10  | N9   | 124.4(2)   |
| C10  | N9   | C11  | 123.71(18) | O10  | C10  | C10A | 127.3(2)   |
| N2   | C1   | C10B | 113.95(18) | N9   | C10  | C10A | 108.34(18) |
| N2   | C3   | C3A  | 113.38(19) | C10  | C10A | C7A  | 105.05(17) |
| O12  | C3A  | C3   | 111.70(19) | C10  | C10A | C10B | 113.51(18) |
| O12  | C3A  | C4   | 101.09(18) | C10B | C10A | C7A  | 101.18(16) |
| O12  | C3A  | C10C | 101.38(17) | O11  | C10B | C1   | 110.38(17) |
| C3   | C3A  | C4   | 122.4(2)   | O11  | C10B | C10A | 101.20(16) |
| C3   | C3A  | C10C | 113.58(18) | O11  | C10B | C10C | 102.88(17) |
| C4   | C3A  | C10C | 104.07(18) | C1   | C10B | C10A | 119.63(18) |
| C5   | C4   | C3A  | 106.3(2)   | C1   | C10B | C10C | 113.93(18) |
| C4   | C5   | C6   | 105.6(2)   | C10C | C10B | C10A | 106.85(17) |
| O12  | C6   | C5   | 101.51(18) | C6A  | C10C | C3A  | 102.16(17) |
| O12  | C6   | C6A  | 102.23(16) | C10B | C10C | C3A  | 112.52(18) |
| C5   | C6   | C6A  | 105.02(19) | C10B | C10C | C6A  | 103.18(17) |
| C7   | C6A  | C6   | 116.36(19) | C12  | C11  | N9   | 118.7(2)   |
| C7   | C6A  | C10C | 100.53(17) | C16  | C11  | N9   | 119.98(19) |
| C10C | C6A  | C6   | 100.36(17) | C16  | C11  | C12  | 121.3(2)   |
| O11  | C7   | C6A  | 104.11(17) | C13  | C12  | C11  | 118.6(2)   |
| O11  | C7   | C7A  | 100.86(16) | C12  | C13  | C14  | 121.1(2)   |
| C6A  | C7   | C7A  | 108.16(18) | C15  | C14  | C13  | 119.2(2)   |
| C7   | C7A  | C10A | 101.99(17) | C16  | C15  | C14  | 120.5(2)   |
| C8   | C7A  | C7   | 110.11(18) | C15  | C16  | C11  | 119.3(2)   |

| D   | H    | A                | d(D-H)/Å | d(H-A)/Å | d(D-A)/Å | D-H-A/° |
|-----|------|------------------|----------|----------|----------|---------|
| N2  | H2   | O11 <sup>1</sup> | 0.98(3)  | 2.00(3)  | 2.887(3) | 151(2)  |
| C3  | H3A  | O10 <sup>2</sup> | 0.99     | 2.57     | 3.479(3) | 152.3   |
| C5  | H5A  | O10 <sup>3</sup> | 0.95     | 2.48     | 3.293(3) | 144.1   |
| C12 | H12A | N2 <sup>4</sup>  | 0.95     | 2.55     | 3.459(3) | 159.9   |
| C16 | H16A | O12 <sup>1</sup> | 0.95     | 2.52     | 3.455(3) | 167.7   |

<sup>1</sup>1-X,1-Y,1-Z; <sup>2</sup>1-X,2-Y,1-Z; <sup>3</sup>1+X,+Y,+Z; <sup>4</sup>+X,3/2-Y,1/2+Z

| A   | B    | C    | D    | Angle/°     | A    | B    | C    | D    | Angle/°     |
|-----|------|------|------|-------------|------|------|------|------|-------------|
| O10 | C10  | C10A | C7A  | 178.1(2)    | C6A  | C7   | C7A  | C10A | 74.1(2)     |
| O10 | C10  | C10A | C10B | -72.3(3)    | C7   | O11  | C10B | C1   | 174.54(17)  |
| O11 | C7   | C7A  | C8   | 75.8(2)     | C7   | O11  | C10B | C10A | -57.78(18)  |
| O11 | C7   | C7A  | C10A | -34.81(19)  | C7   | O11  | C10B | C10C | 52.61(18)   |
| O11 | C10B | C10C | C3A  | 77.6(2)     | C7   | C6A  | C10C | C3A  | -117.98(18) |
| O11 | C10B | C10C | C6A  | -31.7(2)    | C7   | C6A  | C10C | C10B | -1.0(2)     |
| O12 | C3A  | C4   | C5   | -32.6(2)    | C7   | C7A  | C8   | O8   | 65.5(3)     |
| O12 | C3A  | C10C | C6A  | 33.4(2)     | C7   | C7A  | C8   | N9   | -113.4(2)   |
| O12 | C3A  | C10C | C10B | -76.6(2)    | C7   | C7A  | C10A | C10  | 118.53(18)  |
| O12 | C6   | C6A  | C7   | 70.6(2)     | C7   | C7A  | C10A | C10B | 0.2(2)      |
| O12 | C6   | C6A  | C10C | -36.8(2)    | C7A  | C10A | C10B | O11  | 34.49(19)   |
| N2  | C1   | C10B | O11  | -68.4(2)    | C7A  | C10A | C10B | C1   | 155.90(19)  |
| N2  | C1   | C10B | C10A | 174.90(19)  | C7A  | C10A | C10B | C10C | -72.8(2)    |
| N2  | C1   | C10B | C10C | 46.8(3)     | C8   | N9   | C10  | O10  | 179.0(2)    |
| N2  | C3   | C3A  | O12  | 64.6(2)     | C8   | N9   | C10  | C10A | -1.0(2)     |
| N2  | C3   | C3A  | C4   | -175.5(2)   | C8   | N9   | C11  | C12  | 65.6(3)     |
| N2  | C3   | C3A  | C10C | -49.3(3)    | C8   | N9   | C11  | C16  | -113.2(2)   |
| N9  | C10  | C10A | C7A  | -1.9(2)     | C8   | C7A  | C10A | C10  | 3.8(2)      |
| N9  | C10  | C10A | C10B | 107.7(2)    | C8   | C7A  | C10A | C10B | -114.51(18) |
| N9  | C11  | C12  | C13  | -179.8(2)   | C10  | N9   | C8   | O8   | -175.3(2)   |
| N9  | C11  | C16  | C15  | 179.4(2)    | C10  | N9   | C8   | C7A  | 3.6(2)      |
| C1  | N2   | C3   | C3A  | 54.1(3)     | C10  | N9   | C11  | C12  | -114.3(2)   |
| C1  | C10B | C10C | C3A  | -41.9(3)    | C10  | N9   | C11  | C16  | 66.9(3)     |
| C1  | C10B | C10C | C6A  | -151.22(18) | C10  | C10A | C10B | O11  | -77.5(2)    |
| C3  | N2   | C1   | C10B | -52.6(3)    | C10  | C10A | C10B | C1   | 43.9(3)     |
| C3  | C3A  | C4   | C5   | -157.4(2)   | C10  | C10A | C10B | C10C | 175.20(18)  |
| C3  | C3A  | C10C | C6A  | 153.39(19)  | C10A | C7A  | C8   | O8   | 174.4(2)    |

**Table S23 Torsion Angles for 3.**

| A   | B   | C    | D    | Angle/°     | A    | B    | C    | D    | Angle/°     |
|-----|-----|------|------|-------------|------|------|------|------|-------------|
| C3  | C3A | C10C | C10B | 43.4(3)     | C10A | C7A  | C8   | N9   | -4.5(2)     |
| C3A | O12 | C6   | C5   | -49.64(19)  | C10A | C10B | C10C | C3A  | -176.26(17) |
| C3A | O12 | C6   | C6A  | 58.70(18)   | C10A | C10B | C10C | C6A  | 74.4(2)     |
| C3A | C4  | C5   | C6   | 0.9(2)      | C10B | O11  | C7   | C6A  | -54.32(18)  |
| C4  | C3A | C10C | C6A  | -71.2(2)    | C10B | O11  | C7   | C7A  | 57.73(17)   |
| C4  | C3A | C10C | C10B | 178.80(19)  | C10C | C3A  | C4   | C5   | 72.3(2)     |
| C4  | C5  | C6   | O12  | 31.5(2)     | C10C | C6A  | C7   | O11  | 33.7(2)     |
| C4  | C5  | C6   | C6A  | -74.7(2)    | C10C | C6A  | C7   | C7A  | -72.94(19)  |
| C5  | C6  | C6A  | C7   | 176.22(18)  | C11  | N9   | C8   | O8   | 4.7(3)      |
| C5  | C6  | C6A  | C10C | 68.9(2)     | C11  | N9   | C8   | C7A  | -176.33(18) |
| C6  | O12 | C3A  | C3   | -178.12(18) | C11  | N9   | C10  | O10  | -1.1(3)     |
| C6  | O12 | C3A  | C4   | 50.15(18)   | C11  | N9   | C10  | C10A | 178.93(19)  |
| C6  | O12 | C3A  | C10C | -56.83(18)  | C11  | C12  | C13  | C14  | 0.2(3)      |
| C6  | C6A | C7   | O11  | -73.5(2)    | C12  | C11  | C16  | C15  | 0.6(3)      |
| C6  | C6A | C7   | C7A  | 179.82(18)  | C12  | C13  | C14  | C15  | 0.9(4)      |
| C6  | C6A | C10C | C3A  | 1.6(2)      | C13  | C14  | C15  | C16  | -1.3(4)     |
| C6  | C6A | C10C | C10B | 118.49(17)  | C14  | C15  | C16  | C11  | 0.6(4)      |
| C6A | C7  | C7A  | C8   | -175.32(17) | C16  | C11  | C12  | C13  | -1.0(3)     |

**Table S24 Hydrogen Atom Coordinates ( $\text{\AA} \times 10^4$ ) and Isotropic Displacement Parameters ( $\text{\AA}^2 \times 10^3$ ) for 3.**

| Atom | <i>x</i> | <i>y</i> | <i>z</i> | U(eq) |
|------|----------|----------|----------|-------|
| H2   | 5110(30) | 6050(40) | 4273(15) | 47(8) |
| H1A  | 3689.55  | 7140.58  | 4974.33  | 26    |
| H1B  | 4302.39  | 8781.73  | 4828.88  | 26    |
| H3A  | 6303.78  | 8874.75  | 3985.77  | 28    |
| H3B  | 6723.24  | 7291.44  | 3659.84  | 28    |
| H4A  | 9297.62  | 9079.93  | 4388.35  | 31    |
| H5A  | 10886.78 | 7574.57  | 5218.52  | 31    |
| H6A  | 9465.41  | 5301.07  | 5583.89  | 26    |
| H6B  | 8714.69  | 7697.23  | 6274.6   | 23    |
| H7A  | 7357.97  | 5192.27  | 6486.13  | 21    |
| H7B  | 6953.38  | 7811.55  | 7087.16  | 22    |
| H10A | 5541.85  | 9296.74  | 6294.17  | 22    |
| H10B | 7267.53  | 9183.56  | 5501.3   | 22    |
| H12A | 3193.34  | 7131.32  | 8234.45  | 26    |
| H13A | 1216.32  | 6224.55  | 8727.19  | 34    |

**Table S24 Hydrogen Atom Coordinates ( $\text{\AA} \times 10^4$ ) and Isotropic Displacement Parameters ( $\text{\AA}^2 \times 10^3$ ) for 3.**

| Atom | <i>x</i> | <i>y</i> | <i>z</i> | U(eq) |
|------|----------|----------|----------|-------|
| H14A | -513.74  | 4798.72  | 8050.61  | 36    |
| H15A | -203.47  | 4233.12  | 6878.35  | 36    |
| H16A | 1758.96  | 5159.59  | 6372.68  | 27    |

**Table S25 Crystal data and structure refinement for 4.**

|                                                |                                                                |
|------------------------------------------------|----------------------------------------------------------------|
| Identification code                            | Liza_LT                                                        |
| Empirical formula                              | $\text{C}_{16}\text{H}_{17}\text{NO}_7$                        |
| Formula weight                                 | 335.30                                                         |
| Temperature/K                                  | 100(2)                                                         |
| Crystal system                                 | triclinic                                                      |
| Space group                                    | P1                                                             |
| <i>a</i> / $\text{\AA}$                        | 7.7282(7)                                                      |
| <i>b</i> / $\text{\AA}$                        | 9.9974(10)                                                     |
| <i>c</i> / $\text{\AA}$                        | 19.2246(17)                                                    |
| $\alpha$ / $^\circ$                            | 83.079(4)                                                      |
| $\beta$ / $^\circ$                             | 81.948(3)                                                      |
| $\gamma$ / $^\circ$                            | 89.975(4)                                                      |
| Volume/ $\text{\AA}^3$                         | 1459.8(2)                                                      |
| <i>Z</i>                                       | 4                                                              |
| $\rho_{\text{calc}}/\text{cm}^3$               | 1.526                                                          |
| $\mu/\text{mm}^{-1}$                           | 0.121                                                          |
| F(000)                                         | 704.0                                                          |
| Crystal size/ $\text{mm}^3$                    | $0.4 \times 0.16 \times 0.14$                                  |
| Radiation                                      | MoK $\alpha$ ( $\lambda = 0.71073$ )                           |
| 2 $\Theta$ range for data collection/ $^\circ$ | 8.214 to 59.998                                                |
| Index ranges                                   | $-10 \leq h \leq 10, -13 \leq k \leq 14, -27 \leq l \leq 27$   |
| Reflections collected                          | 24899                                                          |
| Independent reflections                        | 14009 [ $R_{\text{int}} = 0.0425, R_{\text{sigma}} = 0.0907$ ] |
| Data/restraints/parameters                     | 14009/3/877                                                    |
| Goodness-of-fit on $F^2$                       | 1.022                                                          |
| Final R indexes [ $I \geq 2\sigma(I)$ ]        | $R_1 = 0.0573, wR_2 = 0.1110$                                  |
| Final R indexes [all data]                     | $R_1 = 0.0861, wR_2 = 0.1242$                                  |
| Largest diff. peak/hole / $e \text{\AA}^{-3}$  | 0.36/-0.36                                                     |
| Flack parameter                                | 0.2(6)                                                         |

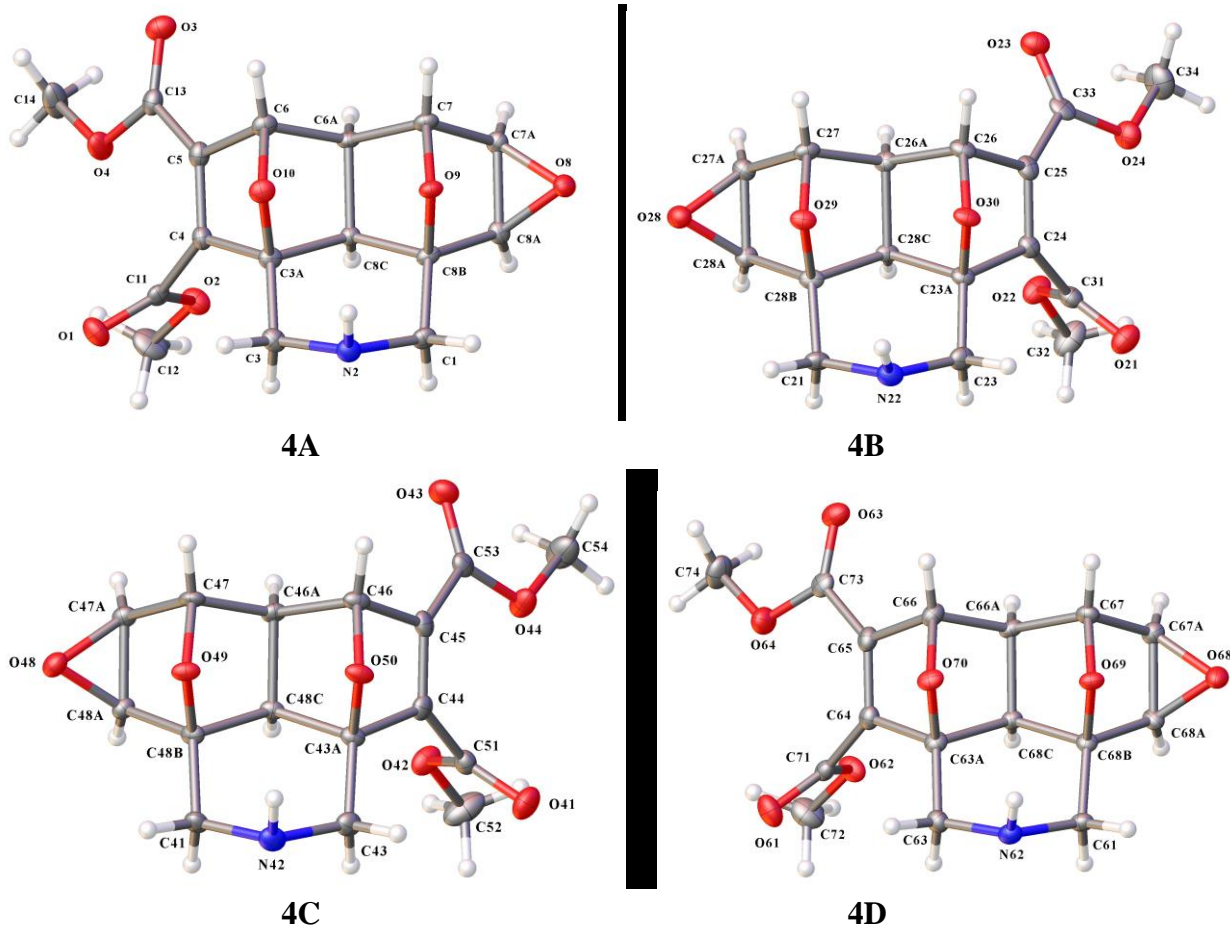

Figure S7. Four independent molecules 4A, 4B, 4C, 4D in the crystal packing of compound 4

**Table S26 Fractional Atomic Coordinates ( $\times 10^4$ ) and Equivalent Isotropic Displacement Parameters ( $\text{\AA}^2 \times 10^3$ ) for 4.  $U_{eq}$  is defined as 1/3 of the trace of the orthogonalised  $U_{IJ}$  tensor.**

| Atom | <i>x</i> | <i>y</i> | <i>z</i>   | $U_{eq}$ |
|------|----------|----------|------------|----------|
| O1   | 6772(4)  | 7591(3)  | 1001.3(16) | 20.6(6)  |
| O2   | 6225(4)  | 9397(3)  | 1586.2(16) | 19.0(6)  |
| O3   | 391(4)   | 8220(3)  | 1928.6(16) | 20.6(6)  |
| O4   | 2826(4)  | 8674(3)  | 1139.9(15) | 20.8(7)  |
| O8   | 4157(4)  | 7950(3)  | 5194.7(14) | 14.9(6)  |
| O9   | 4093(3)  | 6208(3)  | 4351.7(14) | 11.8(5)  |
| O10  | 3957(4)  | 5693(3)  | 2988.7(15) | 14.8(6)  |
| N2   | 7429(5)  | 5429(3)  | 3526.2(18) | 14.5(7)  |
| C1   | 7250(5)  | 6455(4)  | 4012(2)    | 14.3(8)  |
| C3   | 7132(5)  | 5953(4)  | 2807(2)    | 15.3(8)  |
| C3A  | 5386(5)  | 6641(4)  | 2784(2)    | 13.0(8)  |
| C4   | 4885(5)  | 7375(4)  | 2100(2)    | 13.9(8)  |
| C5   | 3119(5)  | 7381(4)  | 2206(2)    | 14.8(8)  |
| C6   | 2562(5)  | 6648(4)  | 2945(2)    | 14.5(8)  |

**Table S26 Fractional Atomic Coordinates ( $\times 10^4$ ) and Equivalent Isotropic Displacement Parameters ( $\text{\AA}^2 \times 10^3$ ) for 4.  $U_{eq}$  is defined as 1/3 of the trace of the orthogonalised  $U_{ij}$  tensor.**

| Atom | <i>x</i> | <i>y</i> | <i>z</i>   | $U_{eq}$ |
|------|----------|----------|------------|----------|
| C6A  | 2957(5)  | 7638(4)  | 3465(2)    | 11.3(7)  |
| C7   | 2665(5)  | 7107(4)  | 4256(2)    | 12.8(8)  |
| C7A  | 3168(5)  | 8312(4)  | 4621(2)    | 13.2(8)  |
| C8A  | 5079(5)  | 8337(4)  | 4491(2)    | 13.1(8)  |
| C8B  | 5499(5)  | 7146(4)  | 4057(2)    | 11.4(7)  |
| C8C  | 5000(5)  | 7681(4)  | 3323(2)    | 10.5(7)  |
| C11  | 6054(5)  | 8103(4)  | 1503(2)    | 13.8(8)  |
| C12  | 7086(6)  | 10242(5) | 977(3)     | 26.8(10) |
| C13  | 1949(5)  | 8121(4)  | 1759(2)    | 15.3(8)  |
| C14  | 1815(6)  | 9496(5)  | 679(2)     | 27.2(10) |
| O21  | 299(4)   | 2793(3)  | 825.4(16)  | 22.6(7)  |
| O22  | 1019(4)  | 4513(3)  | 1392.3(16) | 20.8(7)  |
| O23  | 6306(4)  | 3397(3)  | 1729.5(16) | 21.2(7)  |
| O24  | 4760(4)  | 3531(3)  | 815.8(16)  | 21.8(7)  |
| O28  | 913(4)   | 2885(3)  | 4913.8(15) | 17.8(6)  |
| O29  | 1362(3)  | 1128(3)  | 4065.2(15) | 14.0(6)  |
| O30  | 2152(3)  | 615(3)   | 2667.2(15) | 14.2(6)  |
| N22  | -1615(5) | 463(4)   | 3289(2)    | 17.1(7)  |
| C21  | -1627(5) | 1441(4)  | 3806(2)    | 15.6(8)  |
| C23  | -929(5)  | 1032(4)  | 2566(2)    | 17.3(8)  |
| C23A | 885(5)   | 1636(4)  | 2509(2)    | 12.9(8)  |
| C24  | 1853(5)  | 2374(4)  | 1817(2)    | 14.2(8)  |
| C25  | 3551(5)  | 2301(4)  | 1888(2)    | 15.1(8)  |
| C26A | 3046(5)  | 2512(4)  | 3145(2)    | 12.8(8)  |
| C26  | 3636(5)  | 1505(4)  | 2609(2)    | 15.1(8)  |
| C27A | 2239(5)  | 3222(4)  | 4308(2)    | 14.6(8)  |
| C27  | 2889(5)  | 1993(4)  | 3939(2)    | 14.3(8)  |
| C28B | 143(5)   | 2089(4)  | 3805(2)    | 12.6(8)  |
| C28A | 373(5)   | 3268(4)  | 4226(2)    | 13.6(8)  |
| C28C | 1072(5)  | 2623(4)  | 3054(2)    | 11.8(7)  |
| C31  | 977(5)   | 3223(4)  | 1278(2)    | 15.8(8)  |
| C32  | 148(7)   | 5458(4)  | 918(3)     | 28.5(11) |
| C33  | 5025(5)  | 3122(4)  | 1484(2)    | 17.0(8)  |
| C34  | 6091(7)  | 4461(5)  | 420(3)     | 30.5(11) |
| O41  | 9555(4)  | 5771(3)  | 9183.0(16) | 24.4(7)  |
| O42  | 9145(4)  | 7783(3)  | 8571.6(16) | 20.9(7)  |



**Table S26 Fractional Atomic Coordinates ( $\times 10^4$ ) and Equivalent Isotropic Displacement Parameters ( $\text{\AA}^2 \times 10^3$ ) for 4.  $U_{eq}$  is defined as 1/3 of the trace of the orthogonalised  $U_{ij}$  tensor.**

| Atom | <i>x</i> | <i>y</i> | <i>z</i>   | $U_{eq}$ |
|------|----------|----------|------------|----------|
| O43  | 3658(4)  | 6829(3)  | 8319.4(17) | 21.9(7)  |
| O44  | 5494(4)  | 6730(3)  | 9137.5(16) | 22.9(7)  |
| O48  | 9092(4)  | 7868(3)  | 5063.5(15) | 17.3(6)  |
| O49  | 8628(3)  | 5710(3)  | 5900.6(15) | 13.7(6)  |
| O50  | 7822(3)  | 4533(3)  | 7301.0(15) | 14.8(6)  |
| N42  | 11607(5) | 4648(3)  | 6668.5(19) | 17.4(7)  |
| C41  | 11618(5) | 5872(4)  | 6165(2)    | 15.8(8)  |
| C43  | 10911(5) | 4875(4)  | 7399(2)    | 17.1(8)  |
| C43A | 9098(5)  | 5458(4)  | 7462(2)    | 12.9(7)  |
| C44  | 8150(5)  | 5888(4)  | 8154(2)    | 13.9(8)  |
| C45  | 6450(5)  | 5869(4)  | 8089(2)    | 14.6(8)  |
| C46  | 6337(5)  | 5418(4)  | 7367(2)    | 14.7(8)  |
| C46A | 6963(5)  | 6664(4)  | 6828(2)    | 12.7(8)  |
| C47  | 7106(5)  | 6524(4)  | 6036(2)    | 13.5(8)  |
| C47A | 7769(5)  | 7914(4)  | 5669(2)    | 13.7(8)  |
| C48A | 9627(5)  | 7923(4)  | 5747(2)    | 12.9(8)  |
| C48B | 9843(5)  | 6537(4)  | 6168(2)    | 12.4(7)  |
| C48C | 8935(5)  | 6720(4)  | 6914(2)    | 11.9(7)  |
| C51  | 9017(5)  | 6441(4)  | 8700(2)    | 15.6(8)  |
| C52  | 9908(7)  | 8453(5)  | 9087(3)    | 32.9(12) |
| C53  | 5033(5)  | 6516(4)  | 8510(2)    | 15.3(8)  |
| C54  | 4243(7)  | 7447(5)  | 9583(3)    | 30.9(11) |
| O61  | 3098(4)  | 705(3)   | 8955.8(17) | 24.7(7)  |
| O62  | 3912(4)  | 2811(3)  | 8473.7(16) | 19.9(6)  |
| O63  | 9627(4)  | 1776(3)  | 8033.4(17) | 21.6(6)  |
| O64  | 7297(4)  | 1652(3)  | 8885.8(16) | 23.1(7)  |
| O68  | 5821(4)  | 3030(3)  | 4801.8(15) | 16.7(6)  |
| O69  | 5877(3)  | 900(3)   | 5642.6(15) | 13.0(6)  |
| O70  | 6004(3)  | -251(3)  | 7005.8(15) | 15.2(6)  |
| N62  | 2541(4)  | -246(3)  | 6476.0(19) | 15.3(7)  |
| C61  | 2724(5)  | 999(4)   | 5985(2)    | 14.2(8)  |
| C63  | 2837(5)  | -47(4)   | 7199(2)    | 15.6(8)  |
| C63A | 4577(5)  | 624(4)   | 7212(2)    | 14.1(8)  |
| C64  | 5128(5)  | 1030(4)  | 7898(2)    | 15.1(8)  |
| C65  | 6876(5)  | 1058(4)  | 7791(2)    | 15.7(8)  |
| C66  | 7412(5)  | 665(4)   | 7043(2)    | 15.2(8)  |

**Table S26 Fractional Atomic Coordinates ( $\times 10^4$ ) and Equivalent Isotropic Displacement Parameters ( $\text{\AA}^2 \times 10^3$ ) for 4.  $U_{eq}$  is defined as 1/3 of the trace of the orthogonalised  $U_{ij}$  tensor.**

| Atom | <i>x</i> | <i>y</i> | <i>z</i> | $U_{eq}$ |
|------|----------|----------|----------|----------|
| C66A | 7024(5)  | 1910(4)  | 6530(2)  | 12.7(8)  |
| C67  | 7318(5)  | 1749(4)  | 5730(2)  | 13.9(8)  |
| C67A | 6825(5)  | 3124(4)  | 5372(2)  | 14.9(8)  |
| C68A | 4907(5)  | 3092(4)  | 5501(2)  | 14.0(8)  |
| C68B | 4476(5)  | 1712(4)  | 5936(2)  | 12.3(8)  |
| C68C | 4992(5)  | 1906(4)  | 6667(2)  | 11.9(7)  |
| C71  | 3946(5)  | 1471(4)  | 8496(2)  | 13.8(8)  |
| C72  | 2924(6)  | 3334(5)  | 9075(3)  | 27.8(10) |
| C73  | 8087(5)  | 1534(4)  | 8231(2)  | 16.4(8)  |
| C74  | 8373(6)  | 2194(5)  | 9342(2)  | 27.6(11) |

**Table S27 Anisotropic Displacement Parameters ( $\text{\AA}^2 \times 10^3$ ) for 4. The Anisotropic displacement factor exponent takes the form:  $-2\pi^2[h^2a^{*2}U_{11}+2hka^*b^*U_{12}+\dots]$ .**

| Atom | $U_{11}$ | $U_{22}$ | $U_{33}$ | $U_{23}$ | $U_{13}$ | $U_{12}$ |
|------|----------|----------|----------|----------|----------|----------|
| O1   | 24.5(17) | 17.8(15) | 18.1(16) | -3.2(12) | 2.6(13)  | 4.5(12)  |
| O2   | 21.4(16) | 11.8(14) | 22.2(17) | -0.6(12) | 1.5(13)  | 0.6(11)  |
| O3   | 18.0(16) | 16.6(15) | 27.9(17) | -1.7(12) | -6.3(13) | 2.4(11)  |
| O4   | 23.3(16) | 23.7(16) | 14.8(15) | 2.5(12)  | -4.6(12) | 9.4(12)  |
| O8   | 15.0(14) | 15.8(14) | 13.4(14) | -0.5(11) | -1.3(11) | -0.2(10) |
| O9   | 9.1(13)  | 9.8(13)  | 16.0(14) | 0.6(10)  | -2.5(11) | 0.2(10)  |
| O10  | 16.4(14) | 8.4(13)  | 19.4(15) | 0.5(11)  | -3.6(12) | 1.9(10)  |
| N2   | 15.8(17) | 10.9(16) | 16.5(18) | 0.7(13)  | -2.8(14) | 2.4(12)  |
| C1   | 13.6(19) | 12.5(19) | 17(2)    | 0.3(15)  | -4.7(16) | 3.0(14)  |
| C3   | 17(2)    | 12.3(19) | 15(2)    | 0.4(15)  | -0.4(16) | 1.6(15)  |
| C3A  | 14.3(19) | 9.4(18)  | 14.3(19) | 2.4(14)  | -2.1(15) | 0.6(14)  |
| C4   | 17(2)    | 12.8(18) | 11.4(19) | -1.5(14) | -1.7(15) | 0.2(14)  |
| C5   | 20(2)    | 12.3(19) | 13.2(19) | -1.7(15) | -4.2(16) | 2.0(15)  |
| C6   | 14.3(19) | 11.3(18) | 18(2)    | 1.0(15)  | -3.8(16) | 2.1(14)  |
| C6A  | 8.5(17)  | 9.1(17)  | 16(2)    | 0.2(14)  | -1.7(15) | -0.6(13) |
| C7   | 10.0(18) | 10.1(18) | 19(2)    | -0.5(15) | -3.5(15) | 2.1(13)  |
| C7A  | 14.6(19) | 10.1(18) | 15(2)    | -2.1(14) | -2.4(16) | 1.8(14)  |
| C8A  | 16.3(19) | 9.3(18)  | 13.0(19) | 0.5(14)  | -1.6(16) | 1.3(14)  |
| C8B  | 11.3(18) | 6.8(17)  | 16.0(19) | 1.7(14)  | -4.1(15) | -0.2(13) |
| C8C  | 11.1(18) | 8.5(17)  | 11.6(18) | 0.1(13)  | -1.8(15) | 0.1(13)  |
| C11  | 13.3(19) | 14.3(19) | 14(2)    | 0.4(15)  | -5.1(16) | 3.6(14)  |

| <b>Table S27 Anisotropic Displacement Parameters (<math>\text{\AA}^2 \times 10^3</math>) for 4. The Anisotropic displacement factor exponent takes the form: <math>-2\pi^2[h^2a^*^2U_{11}+2hka^*b^*U_{12}+\dots]</math>.</b> |                       |                       |                       |                       |                       |                       |
|------------------------------------------------------------------------------------------------------------------------------------------------------------------------------------------------------------------------------|-----------------------|-----------------------|-----------------------|-----------------------|-----------------------|-----------------------|
| <b>Atom</b>                                                                                                                                                                                                                  | <b>U<sub>11</sub></b> | <b>U<sub>22</sub></b> | <b>U<sub>33</sub></b> | <b>U<sub>23</sub></b> | <b>U<sub>13</sub></b> | <b>U<sub>12</sub></b> |
| C12                                                                                                                                                                                                                          | 30(3)                 | 19(2)                 | 26(3)                 | 7.4(18)               | 7(2)                  | -3.4(18)              |
| C13                                                                                                                                                                                                                          | 21(2)                 | 12.1(19)              | 14(2)                 | -2.7(15)              | -5.3(16)              | 0.7(15)               |
| C14                                                                                                                                                                                                                          | 38(3)                 | 28(2)                 | 16(2)                 | -1.2(18)              | -7(2)                 | 19(2)                 |
| O21                                                                                                                                                                                                                          | 29.9(18)              | 15.3(15)              | 24.6(17)              | -1.7(12)              | -11.2(14)             | 0.1(12)               |
| O22                                                                                                                                                                                                                          | 28.1(17)              | 11.6(14)              | 25.1(17)              | -2.6(12)              | -11.3(14)             | 4.9(12)               |
| O23                                                                                                                                                                                                                          | 18.5(16)              | 17.8(16)              | 26.8(18)              | -1.6(13)              | -2.6(13)              | -0.2(11)              |
| O24                                                                                                                                                                                                                          | 24.7(17)              | 19.6(16)              | 19.3(16)              | 3.4(12)               | -1.5(13)              | -1.5(12)              |
| O28                                                                                                                                                                                                                          | 16.1(15)              | 19.4(15)              | 17.2(15)              | 0.5(12)               | -2.3(12)              | -0.9(11)              |
| O29                                                                                                                                                                                                                          | 13.1(14)              | 7.6(13)               | 20.6(15)              | 1.7(10)               | -2.6(11)              | 0.4(10)               |
| O30                                                                                                                                                                                                                          | 10.6(13)              | 7.6(13)               | 23.5(16)              | -0.2(11)              | -1.1(11)              | 1.9(10)               |
| N22                                                                                                                                                                                                                          | 16.9(18)              | 11.5(17)              | 22(2)                 | -0.5(14)              | -2.5(15)              | -0.7(13)              |
| C21                                                                                                                                                                                                                          | 11.8(19)              | 13.4(19)              | 22(2)                 | -2.6(16)              | -3.4(16)              | -2.0(14)              |
| C23                                                                                                                                                                                                                          | 18(2)                 | 13(2)                 | 22(2)                 | -5.7(16)              | -4.1(17)              | -0.5(15)              |
| C23A                                                                                                                                                                                                                         | 11.9(18)              | 9.0(17)               | 18(2)                 | -1.2(14)              | -2.2(15)              | 3.0(14)               |
| C24                                                                                                                                                                                                                          | 16(2)                 | 9.9(18)               | 16(2)                 | -1.5(14)              | -0.1(16)              | 0.6(14)               |
| C25                                                                                                                                                                                                                          | 18(2)                 | 10.9(18)              | 16(2)                 | -1.2(15)              | 0.1(16)               | 4.7(14)               |
| C26A                                                                                                                                                                                                                         | 13.7(19)              | 8.9(18)               | 15(2)                 | 2.7(14)               | -3.4(15)              | 0.9(14)               |
| C26                                                                                                                                                                                                                          | 11.3(19)              | 10.6(18)              | 22(2)                 | 0.6(15)               | -0.8(16)              | 2.8(14)               |
| C27A                                                                                                                                                                                                                         | 14.6(19)              | 11.9(19)              | 16(2)                 | 1.4(15)               | -0.4(16)              | 0.5(14)               |
| C27                                                                                                                                                                                                                          | 12.7(19)              | 9.3(18)               | 22(2)                 | -1.2(15)              | -5.9(16)              | -1.0(14)              |
| C28B                                                                                                                                                                                                                         | 13.0(18)              | 5.9(17)               | 18(2)                 | 3.0(14)               | -3.2(15)              | 0.4(13)               |
| C28A                                                                                                                                                                                                                         | 15.3(19)              | 9.8(18)               | 16(2)                 | 0.2(14)               | -3.1(16)              | 1.9(14)               |
| C28C                                                                                                                                                                                                                         | 10.7(18)              | 6.7(17)               | 18(2)                 | -1.8(14)              | -3.2(15)              | 0.8(13)               |
| C31                                                                                                                                                                                                                          | 14(2)                 | 14(2)                 | 18(2)                 | -0.3(15)              | -0.2(17)              | 2.0(15)               |
| C32                                                                                                                                                                                                                          | 46(3)                 | 13(2)                 | 29(3)                 | 2.4(18)               | -19(2)                | 4.1(19)               |
| C33                                                                                                                                                                                                                          | 15(2)                 | 11.0(19)              | 23(2)                 | -0.9(16)              | 1.8(17)               | 6.7(15)               |
| C34                                                                                                                                                                                                                          | 38(3)                 | 24(2)                 | 26(3)                 | 4.9(19)               | 4(2)                  | -6(2)                 |
| O41                                                                                                                                                                                                                          | 33.0(19)              | 19.2(16)              | 21.9(17)              | 1.1(13)               | -9.9(14)              | 4.7(13)               |
| O42                                                                                                                                                                                                                          | 27.8(17)              | 11.4(14)              | 25.3(17)              | -1.3(12)              | -11.1(13)             | 0.7(12)               |
| O43                                                                                                                                                                                                                          | 17.5(15)              | 23.3(16)              | 25.0(17)              | -5.2(13)              | -0.9(13)              | 5.6(12)               |
| O44                                                                                                                                                                                                                          | 24.7(16)              | 28.2(18)              | 16.6(16)              | -6.2(13)              | -2.4(13)              | 13.4(13)              |
| O48                                                                                                                                                                                                                          | 19.2(15)              | 18.5(15)              | 15.4(15)              | -3.2(12)              | -5.5(12)              | 4.3(11)               |
| O49                                                                                                                                                                                                                          | 11.1(13)              | 9.9(13)               | 22.0(16)              | -7.0(11)              | -4.9(11)              | 2.9(10)               |
| O50                                                                                                                                                                                                                          | 10.4(13)              | 9.5(13)               | 24.7(16)              | -4.3(11)              | -1.1(12)              | 1.4(10)               |
| N42                                                                                                                                                                                                                          | 16.4(17)              | 12.3(17)              | 23(2)                 | -1.2(14)              | -1.8(15)              | 3.9(13)               |
| C41                                                                                                                                                                                                                          | 11.9(19)              | 16(2)                 | 18(2)                 | -0.5(16)              | 0.6(16)               | 3.6(14)               |
| C43                                                                                                                                                                                                                          | 17(2)                 | 12.4(19)              | 21(2)                 | 0.5(16)               | -2.9(17)              | 2.6(15)               |

| <b>Table S27 Anisotropic Displacement Parameters (<math>\text{\AA}^2 \times 10^3</math>) for 4. The Anisotropic displacement factor exponent takes the form: <math>-2\pi^2[h^2a^*U_{11}+2hka^*b^*U_{12}+\dots]</math>.</b> |                       |                       |                       |                       |                       |                       |
|----------------------------------------------------------------------------------------------------------------------------------------------------------------------------------------------------------------------------|-----------------------|-----------------------|-----------------------|-----------------------|-----------------------|-----------------------|
| <b>Atom</b>                                                                                                                                                                                                                | <b>U<sub>11</sub></b> | <b>U<sub>22</sub></b> | <b>U<sub>33</sub></b> | <b>U<sub>23</sub></b> | <b>U<sub>13</sub></b> | <b>U<sub>12</sub></b> |
| C43A                                                                                                                                                                                                                       | 11.5(18)              | 9.0(17)               | 18(2)                 | -2.9(14)              | -1.4(15)              | -0.5(13)              |
| C44                                                                                                                                                                                                                        | 19(2)                 | 9.0(18)               | 14(2)                 | 1.1(14)               | -3.3(16)              | 1.0(14)               |
| C45                                                                                                                                                                                                                        | 19(2)                 | 9.6(18)               | 13(2)                 | 0.4(14)               | 1.0(16)               | -2.2(14)              |
| C46                                                                                                                                                                                                                        | 10.5(18)              | 10.0(18)              | 23(2)                 | -2.4(15)              | -2.2(16)              | 1.3(13)               |
| C46A                                                                                                                                                                                                                       | 11.8(18)              | 8.9(18)               | 18(2)                 | -2.7(14)              | -4.4(15)              | 2.8(13)               |
| C47                                                                                                                                                                                                                        | 7.9(17)               | 15.2(19)              | 19(2)                 | -5.6(15)              | -2.9(15)              | 3.3(14)               |
| C47A                                                                                                                                                                                                                       | 13.4(19)              | 12.8(19)              | 16(2)                 | -4.1(15)              | -2.8(16)              | 3.4(14)               |
| C48A                                                                                                                                                                                                                       | 14.6(19)              | 10.8(18)              | 14.2(19)              | -2.0(14)              | -4.4(15)              | 1.8(14)               |
| C48B                                                                                                                                                                                                                       | 11.9(18)              | 12.3(18)              | 14.0(19)              | -5.8(14)              | -1.4(15)              | 2.3(14)               |
| C48C                                                                                                                                                                                                                       | 10.2(18)              | 8.9(17)               | 17(2)                 | -4.5(14)              | -1.5(15)              | 1.5(13)               |
| C51                                                                                                                                                                                                                        | 16(2)                 | 15(2)                 | 15(2)                 | -1.8(15)              | 0.7(16)               | 1.6(15)               |
| C52                                                                                                                                                                                                                        | 42(3)                 | 21(2)                 | 44(3)                 | -11(2)                | -27(3)                | 4(2)                  |
| C53                                                                                                                                                                                                                        | 16(2)                 | 10.7(18)              | 17(2)                 | 1.6(15)               | 1.0(16)               | 0.1(14)               |
| C54                                                                                                                                                                                                                        | 32(3)                 | 39(3)                 | 24(3)                 | -11(2)                | -4(2)                 | 18(2)                 |
| O61                                                                                                                                                                                                                        | 33.4(18)              | 18.2(16)              | 19.7(16)              | 1.0(12)               | 2.8(14)               | -4.2(13)              |
| O62                                                                                                                                                                                                                        | 21.6(16)              | 10.3(14)              | 25.4(17)              | 0.7(12)               | 2.2(13)               | 1.4(11)               |
| O63                                                                                                                                                                                                                        | 18.6(16)              | 16.8(15)              | 29.5(18)              | 0.2(12)               | -6.8(13)              | -0.7(11)              |
| O64                                                                                                                                                                                                                        | 23.9(16)              | 28.6(17)              | 17.7(16)              | -5.0(13)              | -4.5(13)              | -1.1(13)              |
| O68                                                                                                                                                                                                                        | 15.4(14)              | 18.3(15)              | 16.2(15)              | -2.9(11)              | -1.2(12)              | 3.7(11)               |
| O69                                                                                                                                                                                                                        | 10.3(13)              | 9.6(13)               | 19.8(15)              | -4.8(11)              | -2.4(11)              | 0.3(10)               |
| O70                                                                                                                                                                                                                        | 14.2(14)              | 8.4(13)               | 23.9(16)              | -3.8(11)              | -4.3(12)              | 2.9(10)               |
| N62                                                                                                                                                                                                                        | 13.5(17)              | 12.8(17)              | 19.9(19)              | -2.0(13)              | -3.5(14)              | -1.3(13)              |
| C61                                                                                                                                                                                                                        | 11.1(18)              | 12.1(18)              | 19(2)                 | -2.0(15)              | -2.8(16)              | -0.6(14)              |
| C63                                                                                                                                                                                                                        | 17(2)                 | 13.4(19)              | 16(2)                 | -0.5(15)              | -0.7(16)              | -0.2(15)              |
| C63A                                                                                                                                                                                                                       | 14.9(19)              | 11.2(18)              | 17(2)                 | -3.7(15)              | -2.5(16)              | 3.3(14)               |
| C64                                                                                                                                                                                                                        | 19(2)                 | 11.4(19)              | 15(2)                 | -0.1(15)              | -3.8(16)              | -0.3(15)              |
| C65                                                                                                                                                                                                                        | 20(2)                 | 13.3(19)              | 14(2)                 | -1.2(15)              | -4.0(16)              | 4.3(15)               |
| C66                                                                                                                                                                                                                        | 17(2)                 | 13.2(19)              | 17(2)                 | -4.3(15)              | -5.7(16)              | 3.0(15)               |
| C66A                                                                                                                                                                                                                       | 10.6(18)              | 9.7(18)               | 19(2)                 | -4.3(15)              | -4.9(15)              | 1.8(13)               |
| C67                                                                                                                                                                                                                        | 11.7(18)              | 10.7(18)              | 19(2)                 | -1.7(15)              | -1.5(16)              | -1.8(14)              |
| C67A                                                                                                                                                                                                                       | 16(2)                 | 12.1(19)              | 17(2)                 | -3.4(15)              | -3.0(16)              | 0.8(14)               |
| C68A                                                                                                                                                                                                                       | 14.5(19)              | 10.6(18)              | 16(2)                 | -1.3(15)              | 0.3(16)               | 2.1(14)               |
| C68B                                                                                                                                                                                                                       | 12.4(19)              | 10.4(18)              | 14.3(19)              | -3.5(14)              | -0.7(15)              | 2.8(14)               |
| C68C                                                                                                                                                                                                                       | 11.9(18)              | 9.4(17)               | 14.9(19)              | -3.1(14)              | -2.4(15)              | 0.7(13)               |
| C71                                                                                                                                                                                                                        | 14.2(19)              | 11.6(18)              | 16(2)                 | 0.8(15)               | -5.1(16)              | -0.8(14)              |
| C72                                                                                                                                                                                                                        | 31(3)                 | 20(2)                 | 31(3)                 | -9.6(19)              | 6(2)                  | 2.4(18)               |
| C73                                                                                                                                                                                                                        | 20(2)                 | 8.7(18)               | 21(2)                 | 1.3(15)               | -5.8(17)              | 2.5(15)               |

| <b>Table S27 Anisotropic Displacement Parameters (<math>\text{\AA}^2 \times 10^3</math>) for 4. The Anisotropic displacement factor exponent takes the form: <math>-2\pi^2[h^2a^*2U_{11}+2hka^*b^*U_{12}+\dots]</math>.</b> |                       |                       |                       |                       |                       |                       |
|-----------------------------------------------------------------------------------------------------------------------------------------------------------------------------------------------------------------------------|-----------------------|-----------------------|-----------------------|-----------------------|-----------------------|-----------------------|
| <b>Atom</b>                                                                                                                                                                                                                 | <b>U<sub>11</sub></b> | <b>U<sub>22</sub></b> | <b>U<sub>33</sub></b> | <b>U<sub>23</sub></b> | <b>U<sub>13</sub></b> | <b>U<sub>12</sub></b> |
| C74                                                                                                                                                                                                                         | 36(3)                 | 26(2)                 | 24(3)                 | -4.3(19)              | -14(2)                | -6(2)                 |

| <b>Table S28 Bond Lengths for 4.</b> |             |                                       |             |             |                                       |
|--------------------------------------|-------------|---------------------------------------|-------------|-------------|---------------------------------------|
| <b>Atom</b>                          | <b>Atom</b> | <b>Length/<math>\text{\AA}</math></b> | <b>Atom</b> | <b>Atom</b> | <b>Length/<math>\text{\AA}</math></b> |
| O1                                   | C11         | 1.212(5)                              | O41         | C51         | 1.202(5)                              |
| O2                                   | C11         | 1.331(5)                              | O42         | C51         | 1.336(5)                              |
| O2                                   | C12         | 1.439(5)                              | O42         | C52         | 1.450(5)                              |
| O3                                   | C13         | 1.209(5)                              | O43         | C53         | 1.201(5)                              |
| O4                                   | C13         | 1.341(5)                              | O44         | C53         | 1.345(5)                              |
| O4                                   | C14         | 1.446(5)                              | O44         | C54         | 1.448(5)                              |
| O8                                   | C7A         | 1.440(5)                              | O48         | C47A        | 1.443(5)                              |
| O8                                   | C8A         | 1.447(5)                              | O48         | C48A        | 1.439(5)                              |
| O9                                   | C7          | 1.441(4)                              | O49         | C47         | 1.442(4)                              |
| O9                                   | C8B         | 1.443(4)                              | O49         | C48B        | 1.438(4)                              |
| O10                                  | C3A         | 1.436(5)                              | O50         | C43A        | 1.442(4)                              |
| O10                                  | C6          | 1.445(4)                              | O50         | C46         | 1.450(5)                              |
| N2                                   | C1          | 1.462(5)                              | N42         | C41         | 1.465(5)                              |
| N2                                   | C3          | 1.468(5)                              | N42         | C43         | 1.477(5)                              |
| C1                                   | C8B         | 1.516(5)                              | C41         | C48B        | 1.524(5)                              |
| C3                                   | C3A         | 1.518(5)                              | C43         | C43A        | 1.512(5)                              |
| C3A                                  | C4          | 1.526(5)                              | C43A        | C44         | 1.535(5)                              |
| C3A                                  | C8C         | 1.554(5)                              | C43A        | C48C        | 1.559(5)                              |
| C4                                   | C5          | 1.352(6)                              | C44         | C45         | 1.338(6)                              |
| C4                                   | C11         | 1.473(6)                              | C44         | C51         | 1.480(6)                              |
| C5                                   | C6          | 1.522(6)                              | C45         | C46         | 1.524(6)                              |
| C5                                   | C13         | 1.472(6)                              | C45         | C53         | 1.467(6)                              |
| C6                                   | C6A         | 1.547(5)                              | C46         | C46A        | 1.551(6)                              |
| C6A                                  | C7          | 1.536(5)                              | C46A        | C47         | 1.535(6)                              |
| C6A                                  | C8C         | 1.564(5)                              | C46A        | C48C        | 1.558(5)                              |
| C7                                   | C7A         | 1.540(5)                              | C47         | C47A        | 1.535(6)                              |
| C7A                                  | C8A         | 1.463(5)                              | C47A        | C48A        | 1.465(5)                              |
| C8A                                  | C8B         | 1.543(5)                              | C48A        | C48B        | 1.539(5)                              |
| C8B                                  | C8C         | 1.548(5)                              | C48B        | C48C        | 1.539(5)                              |
| O21                                  | C31         | 1.198(5)                              | O61         | C71         | 1.214(5)                              |
| O22                                  | C31         | 1.336(5)                              | O62         | C71         | 1.336(5)                              |
| O22                                  | C32         | 1.463(5)                              | O62         | C72         | 1.446(5)                              |

| Atom | Atom | Length/Å | Atom | Atom | Length/Å |
|------|------|----------|------|------|----------|
| O23  | C33  | 1.201(5) | O63  | C73  | 1.213(5) |
| O24  | C33  | 1.343(5) | O64  | C73  | 1.339(5) |
| O24  | C34  | 1.453(5) | O64  | C74  | 1.440(5) |
| O28  | C27A | 1.446(5) | O68  | C67A | 1.441(5) |
| O28  | C28A | 1.449(5) | O68  | C68A | 1.437(5) |
| O29  | C27  | 1.438(5) | O69  | C67  | 1.441(4) |
| O29  | C28B | 1.441(4) | O69  | C68B | 1.445(4) |
| O30  | C23A | 1.449(4) | O70  | C63A | 1.449(5) |
| O30  | C26  | 1.436(5) | O70  | C66  | 1.437(5) |
| N22  | C21  | 1.475(5) | N62  | C61  | 1.462(5) |
| N22  | C23  | 1.462(5) | N62  | C63  | 1.477(5) |
| C21  | C28B | 1.513(5) | C61  | C68B | 1.516(5) |
| C23  | C23A | 1.512(5) | C63  | C63A | 1.507(5) |
| C23A | C24  | 1.536(6) | C63A | C64  | 1.540(6) |
| C23A | C28C | 1.543(5) | C63A | C68C | 1.557(5) |
| C24  | C25  | 1.339(5) | C64  | C65  | 1.337(6) |
| C24  | C31  | 1.495(6) | C64  | C71  | 1.476(6) |
| C25  | C26  | 1.522(6) | C65  | C66  | 1.538(6) |
| C25  | C33  | 1.475(6) | C65  | C73  | 1.462(6) |
| C26A | C26  | 1.549(5) | C66  | C66A | 1.549(5) |
| C26A | C27  | 1.542(6) | C66A | C67  | 1.549(5) |
| C26A | C28C | 1.562(5) | C66A | C68C | 1.555(5) |
| C27A | C27  | 1.541(5) | C67  | C67A | 1.535(5) |
| C27A | C28A | 1.473(5) | C67A | C68A | 1.468(5) |
| C28B | C28A | 1.532(5) | C68A | C68B | 1.536(5) |
| C28B | C28C | 1.552(6) | C68B | C68C | 1.547(5) |

| Atom | Atom | Atom | Angle/°  | Atom | Atom | Atom | Angle/°  |
|------|------|------|----------|------|------|------|----------|
| C11  | O2   | C12  | 115.4(3) | C51  | O42  | C52  | 115.9(3) |
| C13  | O4   | C14  | 116.0(3) | C53  | O44  | C54  | 115.8(3) |
| C7A  | O8   | C8A  | 60.9(2)  | C48A | O48  | C47A | 61.1(2)  |
| C7   | O9   | C8B  | 97.6(3)  | C48B | O49  | C47  | 97.6(3)  |
| C3A  | O10  | C6   | 97.2(3)  | C43A | O50  | C46  | 97.1(3)  |
| C1   | N2   | C3   | 113.0(3) | C41  | N42  | C43  | 112.6(3) |
| N2   | C1   | C8B  | 113.5(3) | N42  | C41  | C48B | 114.0(3) |
| N2   | C3   | C3A  | 113.1(3) | N42  | C43  | C43A | 113.0(3) |

| <b>Atom</b> | <b>Atom</b> | <b>Atom</b> | <b>Angle/°</b> | <b>Atom</b> | <b>Atom</b> | <b>Atom</b> | <b>Angle/°</b> |
|-------------|-------------|-------------|----------------|-------------|-------------|-------------|----------------|
| O10         | C3A         | C3          | 111.3(3)       | O50         | C43A        | C43         | 111.9(3)       |
| O10         | C3A         | C4          | 101.0(3)       | O50         | C43A        | C44         | 100.5(3)       |
| O10         | C3A         | C8C         | 102.8(3)       | O50         | C43A        | C48C        | 102.7(3)       |
| C3          | C3A         | C4          | 121.8(3)       | C43         | C43A        | C44         | 123.0(3)       |
| C3          | C3A         | C8C         | 114.0(3)       | C43         | C43A        | C48C        | 113.3(3)       |
| C4          | C3A         | C8C         | 103.6(3)       | C44         | C43A        | C48C        | 102.9(3)       |
| C5          | C4          | C3A         | 104.6(3)       | C45         | C44         | C43A        | 105.4(3)       |
| C5          | C4          | C11         | 127.1(4)       | C45         | C44         | C51         | 128.7(4)       |
| C11         | C4          | C3A         | 127.6(3)       | C51         | C44         | C43A        | 125.0(3)       |
| C4          | C5          | C6          | 106.2(3)       | C44         | C45         | C46         | 106.1(3)       |
| C4          | C5          | C13         | 127.7(4)       | C44         | C45         | C53         | 127.1(4)       |
| C13         | C5          | C6          | 125.4(4)       | C53         | C45         | C46         | 124.6(4)       |
| O10         | C6          | C5          | 100.3(3)       | O50         | C46         | C45         | 100.6(3)       |
| O10         | C6          | C6A         | 102.5(3)       | O50         | C46         | C46A        | 102.8(3)       |
| C5          | C6          | C6A         | 105.9(3)       | C45         | C46         | C46A        | 104.7(3)       |
| C6          | C6A         | C8C         | 100.3(3)       | C46         | C46A        | C48C        | 100.6(3)       |
| C7          | C6A         | C6          | 117.0(3)       | C47         | C46A        | C46         | 118.2(3)       |
| C7          | C6A         | C8C         | 100.2(3)       | C47         | C46A        | C48C        | 100.3(3)       |
| O9          | C7          | C6A         | 104.6(3)       | O49         | C47         | C46A        | 104.1(3)       |
| O9          | C7          | C7A         | 101.8(3)       | O49         | C47         | C47A        | 101.8(3)       |
| C6A         | C7          | C7A         | 104.1(3)       | C47A        | C47         | C46A        | 104.1(3)       |
| O8          | C7A         | C7          | 113.9(3)       | O48         | C47A        | C47         | 114.1(3)       |
| O8          | C7A         | C8A         | 59.8(2)        | O48         | C47A        | C48A        | 59.3(2)        |
| C8A         | C7A         | C7          | 103.6(3)       | C48A        | C47A        | C47         | 103.8(3)       |
| O8          | C8A         | C7A         | 59.3(2)        | O48         | C48A        | C47A        | 59.6(2)        |
| O8          | C8A         | C8B         | 114.1(3)       | O48         | C48A        | C48B        | 114.5(3)       |
| C7A         | C8A         | C8B         | 103.0(3)       | C47A        | C48A        | C48B        | 102.6(3)       |
| O9          | C8B         | C1          | 111.1(3)       | O49         | C48B        | C41         | 111.2(3)       |
| O9          | C8B         | C8A         | 101.8(3)       | O49         | C48B        | C48A        | 102.0(3)       |
| O9          | C8B         | C8C         | 103.0(3)       | O49         | C48B        | C48C        | 103.6(3)       |
| C1          | C8B         | C8A         | 122.4(3)       | C41         | C48B        | C48A        | 121.8(3)       |
| C1          | C8B         | C8C         | 113.1(3)       | C41         | C48B        | C48C        | 113.3(3)       |
| C8A         | C8B         | C8C         | 103.2(3)       | C48C        | C48B        | C48A        | 102.8(3)       |
| C3A         | C8C         | C6A         | 101.8(3)       | C46A        | C48C        | C43A        | 102.0(3)       |
| C8B         | C8C         | C3A         | 111.9(3)       | C48B        | C48C        | C43A        | 112.5(3)       |
| C8B         | C8C         | C6A         | 102.5(3)       | C48B        | C48C        | C46A        | 102.5(3)       |
| O1          | C11         | O2          | 124.2(4)       | O41         | C51         | O42         | 124.9(4)       |
| O1          | C11         | C4          | 124.5(4)       | O41         | C51         | C44         | 124.6(4)       |

| <b>Atom</b> | <b>Atom</b> | <b>Atom</b> | <b>Angle/°</b> | <b>Atom</b> | <b>Atom</b> | <b>Atom</b> | <b>Angle/°</b> |
|-------------|-------------|-------------|----------------|-------------|-------------|-------------|----------------|
| O2          | C11         | C4          | 111.3(3)       | O42         | C51         | C44         | 110.6(3)       |
| O3          | C13         | O4          | 124.1(4)       | O43         | C53         | O44         | 124.6(4)       |
| O3          | C13         | C5          | 124.3(4)       | O43         | C53         | C45         | 124.8(4)       |
| O4          | C13         | C5          | 111.6(4)       | O44         | C53         | C45         | 110.6(3)       |
| C31         | O22         | C32         | 116.0(3)       | C71         | O62         | C72         | 116.3(3)       |
| C33         | O24         | C34         | 114.2(3)       | C73         | O64         | C74         | 115.4(4)       |
| C27A        | O28         | C28A        | 61.2(2)        | C68A        | O68         | C67A        | 61.3(2)        |
| C27         | O29         | C28B        | 98.1(3)        | C67         | O69         | C68B        | 97.9(3)        |
| C26         | O30         | C23A        | 97.2(3)        | C66         | O70         | C63A        | 97.5(3)        |
| C23         | N22         | C21         | 113.2(3)       | C61         | N62         | C63         | 113.2(3)       |
| N22         | C21         | C28B        | 113.5(3)       | N62         | C61         | C68B        | 113.7(3)       |
| N22         | C23         | C23A        | 112.6(3)       | N62         | C63         | C63A        | 112.5(3)       |
| O30         | C23A        | C23         | 111.5(3)       | O70         | C63A        | C63         | 111.0(3)       |
| O30         | C23A        | C24         | 99.9(3)        | O70         | C63A        | C64         | 100.0(3)       |
| O30         | C23A        | C28C        | 102.7(3)       | O70         | C63A        | C68C        | 102.3(3)       |
| C23         | C23A        | C24         | 122.9(3)       | C63         | C63A        | C64         | 122.1(3)       |
| C23         | C23A        | C28C        | 114.0(3)       | C63         | C63A        | C68C        | 114.9(3)       |
| C24         | C23A        | C28C        | 103.2(3)       | C64         | C63A        | C68C        | 103.8(3)       |
| C25         | C24         | C23A        | 105.2(3)       | C65         | C64         | C63A        | 105.4(3)       |
| C25         | C24         | C31         | 129.4(4)       | C65         | C64         | C71         | 128.2(4)       |
| C31         | C24         | C23A        | 124.1(3)       | C71         | C64         | C63A        | 125.9(3)       |
| C24         | C25         | C26         | 106.1(3)       | C64         | C65         | C66         | 105.9(3)       |
| C24         | C25         | C33         | 128.4(4)       | C64         | C65         | C73         | 129.0(4)       |
| C33         | C25         | C26         | 123.3(4)       | C73         | C65         | C66         | 124.6(4)       |
| C26         | C26A        | C28C        | 99.8(3)        | O70         | C66         | C65         | 100.1(3)       |
| C27         | C26A        | C26         | 117.7(3)       | O70         | C66         | C66A        | 102.8(3)       |
| C27         | C26A        | C28C        | 100.3(3)       | C65         | C66         | C66A        | 105.6(3)       |
| O30         | C26         | C25         | 100.7(3)       | C66         | C66A        | C67         | 116.5(3)       |
| O30         | C26         | C26A        | 103.7(3)       | C66         | C66A        | C68C        | 100.8(3)       |
| C25         | C26         | C26A        | 104.4(3)       | C67         | C66A        | C68C        | 100.1(3)       |
| O28         | C27A        | C27         | 113.4(3)       | O69         | C67         | C66A        | 103.9(3)       |
| O28         | C27A        | C28A        | 59.5(2)        | O69         | C67         | C67A        | 102.2(3)       |
| C28A        | C27A        | C27         | 103.2(3)       | C67A        | C67         | C66A        | 103.9(3)       |
| O29         | C27         | C26A        | 103.9(3)       | O68         | C67A        | C67         | 113.5(3)       |
| O29         | C27         | C27A        | 102.3(3)       | O68         | C67A        | C68A        | 59.2(2)        |
| C27A        | C27         | C26A        | 103.9(3)       | C68A        | C67A        | C67         | 103.4(3)       |
| O29         | C28B        | C21         | 111.5(3)       | O68         | C68A        | C67A        | 59.4(2)        |
| O29         | C28B        | C28A        | 102.1(3)       | O68         | C68A        | C68B        | 114.4(3)       |



| Atom | Atom | Atom | Angle/°  | Atom | Atom | Atom | Angle/°  |
|------|------|------|----------|------|------|------|----------|
| O29  | C28B | C28C | 102.9(3) | C67A | C68A | C68B | 103.3(3) |
| C21  | C28B | C28A | 121.9(3) | O69  | C68B | C61  | 110.8(3) |
| C21  | C28B | C28C | 113.6(3) | O69  | C68B | C68A | 101.8(3) |
| C28A | C28B | C28C | 102.6(3) | O69  | C68B | C68C | 102.6(3) |
| O28  | C28A | C27A | 59.3(2)  | C61  | C68B | C68A | 122.9(3) |
| O28  | C28A | C28B | 114.6(3) | C61  | C68B | C68C | 113.3(3) |
| C27A | C28A | C28B | 103.2(3) | C68A | C68B | C68C | 103.2(3) |
| C23A | C28C | C26A | 102.6(3) | C66A | C68C | C63A | 102.0(3) |
| C23A | C28C | C28B | 112.3(3) | C68B | C68C | C63A | 111.9(3) |
| C28B | C28C | C26A | 102.5(3) | C68B | C68C | C66A | 103.1(3) |
| O21  | C31  | O22  | 125.5(4) | O61  | C71  | O62  | 123.7(4) |
| O21  | C31  | C24  | 124.5(4) | O61  | C71  | C64  | 123.9(4) |
| O22  | C31  | C24  | 110.0(3) | O62  | C71  | C64  | 112.4(3) |
| O23  | C33  | O24  | 124.2(4) | O63  | C73  | O64  | 123.8(4) |
| O23  | C33  | C25  | 123.4(4) | O63  | C73  | C65  | 124.5(4) |
| O24  | C33  | C25  | 112.4(4) | O64  | C73  | C65  | 111.8(4) |

| D    | H    | A                | d(D-H)/Å | d(H-A)/Å | d(D-A)/Å | D-H-A/° |
|------|------|------------------|----------|----------|----------|---------|
| N2   | H2   | O68              | 0.86(5)  | 2.62(5)  | 3.322(5) | 140(4)  |
| C3   | H3B  | O3 <sup>1</sup>  | 0.99     | 2.51     | 3.496(5) | 173.7   |
| C6A  | H6AA | O30 <sup>2</sup> | 1.00     | 2.35     | 3.280(5) | 153.9   |
| C7   | H7A  | O48 <sup>3</sup> | 1.00     | 2.43     | 3.113(5) | 125.0   |
| C7A  | H7AA | O29 <sup>2</sup> | 1.00     | 2.32     | 3.271(5) | 157.8   |
| C14  | H14A | O61 <sup>4</sup> | 0.98     | 2.50     | 3.395(6) | 152.4   |
| C21  | H21B | O68 <sup>3</sup> | 0.99     | 2.58     | 3.123(5) | 114.5   |
| C23  | H23A | O23 <sup>3</sup> | 0.99     | 2.60     | 3.576(5) | 168.7   |
| C23  | H23B | O3 <sup>5</sup>  | 0.99     | 2.43     | 3.306(5) | 147.0   |
| C26A | H26A | O10              | 1.00     | 2.30     | 3.226(5) | 154.3   |
| C27A | H27A | O9               | 1.00     | 2.35     | 3.327(5) | 165.0   |
| C28A | H28B | N2 <sup>3</sup>  | 1.00     | 2.55     | 3.436(5) | 147.8   |
| C34  | H34A | O44 <sup>6</sup> | 0.98     | 2.42     | 3.227(6) | 139.0   |
| C34  | H34B | O1               | 0.98     | 2.55     | 3.511(6) | 165.4   |
| C41  | H41B | O8 <sup>1</sup>  | 0.99     | 2.57     | 3.113(5) | 114.6   |
| C43  | H43B | O63              | 0.99     | 2.41     | 3.290(5) | 148.0   |
| C46A | H46A | O70 <sup>2</sup> | 1.00     | 2.28     | 3.219(5) | 156.6   |
| C47A | H47A | O69 <sup>2</sup> | 1.00     | 2.34     | 3.321(5) | 166.2   |

| <b>D</b> | <b>H</b> | <b>A</b>         | <b>d(D-H)/Å</b> | <b>d(H-A)/Å</b> | <b>d(D-A)/Å</b> | <b>D-H-A/°</b> |
|----------|----------|------------------|-----------------|-----------------|-----------------|----------------|
| C48A     | H48B     | N62 <sup>7</sup> | 1.00            | 2.56            | 3.448(5)        | 148.0          |
| C54      | H54B     | O61 <sup>2</sup> | 0.98            | 2.53            | 3.493(6)        | 167.0          |
| N62      | H62      | O8 <sup>5</sup>  | 0.89(5)         | 2.57(5)         | 3.330(5)        | 143(4)         |
| C63      | H63B     | O63 <sup>3</sup> | 0.99            | 2.42            | 3.410(5)        | 174.4          |
| C66A     | H66A     | O50              | 1.00            | 2.33            | 3.263(5)        | 154.5          |
| C67      | H67B     | O28 <sup>1</sup> | 1.00            | 2.45            | 3.134(5)        | 124.8          |
| C67A     | H67A     | O49              | 1.00            | 2.32            | 3.270(5)        | 158.8          |

<sup>1</sup>1+X,+Y,+Z; <sup>2</sup>+X,1+Y,+Z; <sup>3</sup>-1+X,+Y,+Z; <sup>4</sup>+X,1+Y,-1+Z; <sup>5</sup>+X,-1+Y,+Z; <sup>6</sup>+X,+Y,-1+Z; <sup>7</sup>1+X,1+Y,+Z

| <b>A</b> | <b>B</b> | <b>C</b> | <b>D</b> | <b>Angle/°</b> | <b>A</b> | <b>B</b> | <b>C</b> | <b>D</b> | <b>Angle/°</b> |
|----------|----------|----------|----------|----------------|----------|----------|----------|----------|----------------|
| O8       | C7A      | C8A      | C8B      | 110.5(3)       | O48      | C47A     | C48A     | C48B     | -111.2(3)      |
| O8       | C8A      | C8B      | O9       | 28.6(4)        | O48      | C48A     | C48B     | O49      | -28.1(4)       |
| O8       | C8A      | C8B      | C1       | -96.1(4)       | O48      | C48A     | C48B     | C41      | 96.5(4)        |
| O8       | C8A      | C8B      | C8C      | 135.2(3)       | O48      | C48A     | C48B     | C48C     | -135.3(3)      |
| O9       | C7       | C7A      | O8       | -30.1(4)       | O49      | C47      | C47A     | O48      | 30.3(4)        |
| O9       | C7       | C7A      | C8A      | 32.6(4)        | O49      | C47      | C47A     | C48A     | -31.9(4)       |
| O9       | C8B      | C8C      | C3A      | -76.3(4)       | O49      | C48B     | C48C     | C43A     | 78.1(4)        |
| O9       | C8B      | C8C      | C6A      | 32.0(3)        | O49      | C48B     | C48C     | C46A     | -30.6(3)       |
| O10      | C3A      | C4       | C5       | 33.0(4)        | O50      | C43A     | C44      | C45      | -32.9(4)       |
| O10      | C3A      | C4       | C11      | -155.8(4)      | O50      | C43A     | C44      | C51      | 157.2(3)       |
| O10      | C3A      | C8C      | C6A      | -31.3(3)       | O50      | C43A     | C48C     | C46A     | 31.9(3)        |
| O10      | C3A      | C8C      | C8B      | 77.4(3)        | O50      | C43A     | C48C     | C48B     | -77.2(4)       |
| O10      | C6       | C6A      | C7       | -70.2(4)       | O50      | C46      | C46A     | C47      | 71.9(4)        |
| O10      | C6       | C6A      | C8C      | 36.9(3)        | O50      | C46      | C46A     | C48C     | -36.0(4)       |
| N2       | C1       | C8B      | O9       | 64.5(4)        | N42      | C41      | C48B     | O49      | -67.5(4)       |
| N2       | C1       | C8B      | C8A      | -175.1(3)      | N42      | C41      | C48B     | C48A     | 172.2(3)       |
| N2       | C1       | C8B      | C8C      | -50.7(4)       | N42      | C41      | C48B     | C48C     | 48.8(4)        |
| N2       | C3       | C3A      | O10      | -67.1(4)       | N42      | C43      | C43A     | O50      | 65.3(4)        |
| N2       | C3       | C3A      | C4       | 174.0(3)       | N42      | C43      | C43A     | C44      | -175.1(3)      |
| N2       | C3       | C3A      | C8C      | 48.6(5)        | N42      | C43      | C43A     | C48C     | -50.4(4)       |
| C1       | N2       | C3       | C3A      | -54.6(4)       | C41      | N42      | C43      | C43A     | 55.9(4)        |
| C1       | C8B      | C8C      | C3A      | 43.7(4)        | C41      | C48B     | C48C     | C43A     | -42.5(4)       |
| C1       | C8B      | C8C      | C6A      | 152.1(3)       | C41      | C48B     | C48C     | C46A     | -151.3(3)      |
| C3       | N2       | C1       | C8B      | 56.0(4)        | C43      | N42      | C41      | C48B     | -55.0(4)       |

| <b>Table S31 Torsion Angles for 4.</b> |          |          |          |                |          |          |          |          |                |
|----------------------------------------|----------|----------|----------|----------------|----------|----------|----------|----------|----------------|
| <b>A</b>                               | <b>B</b> | <b>C</b> | <b>D</b> | <b>Angle/°</b> | <b>A</b> | <b>B</b> | <b>C</b> | <b>D</b> | <b>Angle/°</b> |
| C3                                     | C3A      | C4       | C5       | 156.8(4)       | C43      | C43A     | C44      | C45      | -157.8(4)      |
| C3                                     | C3A      | C4       | C11      | -32.0(6)       | C43      | C43A     | C44      | C51      | 32.2(6)        |
| C3                                     | C3A      | C8C      | C6A      | -151.9(3)      | C43      | C43A     | C48C     | C46A     | 152.9(3)       |
| C3                                     | C3A      | C8C      | C8B      | -43.1(4)       | C43      | C43A     | C48C     | C48B     | 43.8(4)        |
| C3A                                    | O10      | C6       | C5       | 51.2(3)        | C43A     | O50      | C46      | C45      | -50.9(3)       |
| C3A                                    | O10      | C6       | C6A      | -57.8(3)       | C43A     | O50      | C46      | C46A     | 57.0(3)        |
| C3A                                    | C4       | C5       | C6       | -0.4(4)        | C43A     | C44      | C45      | C46      | 0.5(4)         |
| C3A                                    | C4       | C5       | C13      | 170.6(4)       | C43A     | C44      | C45      | C53      | -162.9(4)      |
| C3A                                    | C4       | C11      | O1       | 89.3(5)        | C43A     | C44      | C51      | O41      | -88.5(5)       |
| C3A                                    | C4       | C11      | O2       | -90.5(5)       | C43A     | C44      | C51      | O42      | 90.4(4)        |
| C4                                     | C3A      | C8C      | C6A      | 73.6(3)        | C44      | C43A     | C48C     | C46A     | -72.2(3)       |
| C4                                     | C3A      | C8C      | C8B      | -177.7(3)      | C44      | C43A     | C48C     | C48B     | 178.7(3)       |
| C4                                     | C5       | C6       | O10      | -32.0(4)       | C44      | C45      | C46      | O50      | 31.8(4)        |
| C4                                     | C5       | C6       | C6A      | 74.3(4)        | C44      | C45      | C46      | C46A     | -74.6(4)       |
| C4                                     | C5       | C13      | O3       | -170.2(4)      | C44      | C45      | C53      | O43      | 156.5(4)       |
| C4                                     | C5       | C13      | O4       | 9.8(6)         | C44      | C45      | C53      | O44      | -22.6(6)       |
| C5                                     | C4       | C11      | O1       | -101.3(5)      | C45      | C44      | C51      | O41      | 104.0(5)       |
| C5                                     | C4       | C11      | O2       | 78.9(5)        | C45      | C44      | C51      | O42      | -77.2(5)       |
| C5                                     | C6       | C6A      | C7       | -174.8(3)      | C45      | C46      | C46A     | C47      | 176.7(3)       |
| C5                                     | C6       | C6A      | C8C      | -67.7(3)       | C45      | C46      | C46A     | C48C     | 68.8(3)        |
| C6                                     | O10      | C3A      | C3       | 177.4(3)       | C46      | O50      | C43A     | C43      | -176.7(3)      |
| C6                                     | O10      | C3A      | C4       | -51.9(3)       | C46      | O50      | C43A     | C44      | 51.2(3)        |
| C6                                     | O10      | C3A      | C8C      | 55.0(3)        | C46      | O50      | C43A     | C48C     | -54.8(3)       |
| C6                                     | C5       | C13      | O3       | -0.7(6)        | C46      | C45      | C53      | O43      | -4.1(6)        |
| C6                                     | C5       | C13      | O4       | 179.2(3)       | C46      | C45      | C53      | O44      | 176.8(3)       |
| C6                                     | C6A      | C7       | O9       | 73.4(4)        | C46      | C46A     | C47      | O49      | -73.0(4)       |
| C6                                     | C6A      | C7       | C7A      | 179.9(3)       | C46      | C46A     | C47      | C47A     | -179.3(3)      |
| C6                                     | C6A      | C8C      | C3A      | -3.3(3)        | C46      | C46A     | C48C     | C43A     | 2.4(4)         |
| C6                                     | C6A      | C8C      | C8B      | -119.2(3)      | C46      | C46A     | C48C     | C48B     | 119.1(3)       |
| C6A                                    | C7       | C7A      | O8       | -138.7(3)      | C46A     | C47      | C47A     | O48      | 138.3(3)       |
| C6A                                    | C7       | C7A      | C8A      | -76.0(3)       | C46A     | C47      | C47A     | C48A     | 76.0(3)        |
| C7                                     | O9       | C8B      | C1       | -174.5(3)      | C47      | O49      | C48B     | C41      | 174.6(3)       |
| C7                                     | O9       | C8B      | C8A      | 53.7(3)        | C47      | O49      | C48B     | C48A     | -54.0(3)       |
| C7                                     | O9       | C8B      | C8C      | -53.1(3)       | C47      | O49      | C48B     | C48C     | 52.5(3)        |
| C7                                     | C6A      | C8C      | C3A      | 116.7(3)       | C47      | C46A     | C48C     | C43A     | -119.1(3)      |
| C7                                     | C6A      | C8C      | C8B      | 0.8(3)         | C47      | C46A     | C48C     | C48B     | -2.5(3)        |
| C7                                     | C7A      | C8A      | O8       | -110.0(3)      | C47      | C47A     | C48A     | O48      | 110.1(3)       |
| C7                                     | C7A      | C8A      | C8B      | 0.5(4)         | C47      | C47A     | C48A     | C48B     | -1.1(4)        |

**Table S31 Torsion Angles for 4.**

| <b>A</b> | <b>B</b> | <b>C</b> | <b>D</b> | <b>Angle/°</b> | <b>A</b> | <b>B</b> | <b>C</b> | <b>D</b> | <b>Angle/°</b> |
|----------|----------|----------|----------|----------------|----------|----------|----------|----------|----------------|
| C7A      | O8       | C8A      | C8B      | -91.2(3)       | C47A     | O48      | C48A     | C48B     | 90.5(4)        |
| C7A      | C8A      | C8B      | O9       | -33.3(3)       | C47A     | C48A     | C48B     | O49      | 34.0(4)        |
| C7A      | C8A      | C8B      | C1       | -158.0(3)      | C47A     | C48A     | C48B     | C41      | 158.5(3)       |
| C7A      | C8A      | C8B      | C8C      | 73.3(3)        | C47A     | C48A     | C48B     | C48C     | -73.2(3)       |
| C8A      | O8       | C7A      | C7       | 92.2(3)        | C48A     | O48      | C47A     | C47      | -92.2(3)       |
| C8A      | C8B      | C8C      | C3A      | 178.0(3)       | C48A     | C48B     | C48C     | C43A     | -175.9(3)      |
| C8A      | C8B      | C8C      | C6A      | -73.7(3)       | C48A     | C48B     | C48C     | C46A     | 75.3(3)        |
| C8B      | O9       | C7       | C6A      | 54.9(3)        | C48B     | O49      | C47      | C46A     | -55.0(3)       |
| C8B      | O9       | C7       | C7A      | -53.3(3)       | C48B     | O49      | C47      | C47A     | 53.0(3)        |
| C8C      | C3A      | C4       | C5       | -73.3(4)       | C48C     | C43A     | C44      | C45      | 72.9(4)        |
| C8C      | C3A      | C4       | C11      | 98.0(4)        | C48C     | C43A     | C44      | C51      | -97.0(4)       |
| C8C      | C6A      | C7       | O9       | -33.8(3)       | C48C     | C46A     | C47      | O49      | 35.0(3)        |
| C8C      | C6A      | C7       | C7A      | 72.7(3)        | C48C     | C46A     | C47      | C47A     | -71.3(3)       |
| C11      | C4       | C5       | C6       | -171.7(4)      | C51      | C44      | C45      | C46      | 169.9(4)       |
| C11      | C4       | C5       | C13      | -0.7(7)        | C51      | C44      | C45      | C53      | 6.5(7)         |
| C12      | O2       | C11      | O1       | 10.7(6)        | C52      | O42      | C51      | O41      | -3.7(6)        |
| C12      | O2       | C11      | C4       | -169.5(3)      | C52      | O42      | C51      | C44      | 177.5(4)       |
| C13      | C5       | C6       | O10      | 156.7(4)       | C53      | C45      | C46      | O50      | -164.2(3)      |
| C13      | C5       | C6       | C6A      | -97.0(4)       | C53      | C45      | C46      | C46A     | 89.4(4)        |
| C14      | O4       | C13      | O3       | 3.7(6)         | C54      | O44      | C53      | O43      | -3.0(6)        |
| C14      | O4       | C13      | C5       | -176.2(3)      | C54      | O44      | C53      | C45      | 176.1(4)       |
| O28      | C27A     | C27      | O29      | 30.9(4)        | O68      | C67A     | C68A     | C68B     | 110.7(3)       |
| O28      | C27A     | C27      | C26A     | 138.7(3)       | O68      | C68A     | C68B     | O69      | 28.7(4)        |
| O28      | C27A     | C28A     | C28B     | -110.9(3)      | O68      | C68A     | C68B     | C61      | -95.8(4)       |
| O29      | C28B     | C28A     | O28      | -28.5(4)       | O68      | C68A     | C68B     | C68C     | 134.8(3)       |
| O29      | C28B     | C28A     | C27A     | 33.5(4)        | O69      | C67      | C67A     | O68      | -30.3(4)       |
| O29      | C28B     | C28C     | C23A     | 78.8(3)        | O69      | C67      | C67A     | C68A     | 31.7(4)        |
| O29      | C28B     | C28C     | C26A     | -30.7(3)       | O69      | C68B     | C68C     | C63A     | -77.2(4)       |
| O30      | C23A     | C24      | C25      | -33.3(4)       | O69      | C68B     | C68C     | C66A     | 31.7(3)        |
| O30      | C23A     | C24      | C31      | 158.6(3)       | O70      | C63A     | C64      | C65      | 32.6(4)        |
| O30      | C23A     | C28C     | C26A     | 31.8(4)        | O70      | C63A     | C64      | C71      | -154.9(4)      |
| O30      | C23A     | C28C     | C28B     | -77.5(4)       | O70      | C63A     | C68C     | C66A     | -31.6(3)       |
| N22      | C21      | C28B     | O29      | -67.8(4)       | O70      | C63A     | C68C     | C68B     | 77.9(4)        |
| N22      | C21      | C28B     | C28A     | 171.5(3)       | O70      | C66      | C66A     | C67      | -71.1(4)       |
| N22      | C21      | C28B     | C28C     | 48.0(4)        | O70      | C66      | C66A     | C68C     | 36.0(3)        |
| N22      | C23      | C23A     | O30      | 65.4(4)        | N62      | C61      | C68B     | O69      | 64.7(4)        |
| N22      | C23      | C23A     | C24      | -176.2(3)      | N62      | C61      | C68B     | C68A     | -174.9(3)      |
| N22      | C23      | C23A     | C28C     | -50.4(4)       | N62      | C61      | C68B     | C68C     | -49.9(4)       |

| <b>A</b> | <b>B</b> | <b>C</b> | <b>D</b> | <b>Angle/°</b> | <b>A</b> | <b>B</b> | <b>C</b> | <b>D</b> | <b>Angle/°</b> |
|----------|----------|----------|----------|----------------|----------|----------|----------|----------|----------------|
| C21      | N22      | C23      | C23A     | 55.8(4)        | N62      | C63      | C63A     | O70      | -67.1(4)       |
| C21      | C28B     | C28A     | O28      | 96.6(4)        | N62      | C63      | C63A     | C64      | 175.6(3)       |
| C21      | C28B     | C28A     | C27A     | 158.6(3)       | N62      | C63      | C63A     | C68C     | 48.4(4)        |
| C21      | C28B     | C28C     | C23A     | -41.9(4)       | C61      | N62      | C63      | C63A     | -54.6(4)       |
| C21      | C28B     | C28C     | C26A     | -151.4(3)      | C61      | C68B     | C68C     | C63A     | 42.3(4)        |
| C23      | N22      | C21      | C28B     | -55.1(5)       | C61      | C68B     | C68C     | C66A     | 151.2(3)       |
| C23      | C23A     | C24      | C25      | -157.1(3)      | C63      | N62      | C61      | C68B     | 56.0(4)        |
| C23      | C23A     | C24      | C31      | 34.8(6)        | C63      | C63A     | C64      | C65      | 155.3(4)       |
| C23      | C23A     | C28C     | C26A     | 152.6(3)       | C63      | C63A     | C64      | C71      | -32.3(6)       |
| C23      | C23A     | C28C     | C28B     | 43.2(4)        | C63      | C63A     | C68C     | C66A     | -152.0(3)      |
| C23A     | O30      | C26      | C25      | -51.4(3)       | C63      | C63A     | C68C     | C68B     | -42.5(4)       |
| C23A     | O30      | C26      | C26A     | 56.4(3)        | C63A     | O70      | C66      | C65      | 51.7(3)        |
| C23A     | C24      | C25      | C26      | 1.0(4)         | C63A     | O70      | C66      | C66A     | -56.9(3)       |
| C23A     | C24      | C25      | C33      | -162.1(4)      | C63A     | C64      | C65      | C66      | -0.3(4)        |
| C23A     | C24      | C31      | O21      | -83.8(5)       | C63A     | C64      | C65      | C73      | 171.9(4)       |
| C23A     | C24      | C31      | O22      | 94.4(4)        | C63A     | C64      | C71      | O61      | 81.6(5)        |
| C24      | C23A     | C28C     | C26A     | -71.7(3)       | C63A     | C64      | C71      | O62      | -98.2(4)       |
| C24      | C23A     | C28C     | C28B     | 178.9(3)       | C64      | C63A     | C68C     | C66A     | 72.0(3)        |
| C24      | C25      | C26      | O30      | 31.9(4)        | C64      | C63A     | C68C     | C68B     | -178.4(3)      |
| C24      | C25      | C26      | C26A     | -75.4(4)       | C64      | C65      | C66      | O70      | -32.5(4)       |
| C24      | C25      | C33      | O23      | 148.8(4)       | C64      | C65      | C66      | C66A     | 73.9(4)        |
| C24      | C25      | C33      | O24      | -30.6(6)       | C64      | C65      | C73      | O63      | -164.6(4)      |
| C25      | C24      | C31      | O21      | 111.1(5)       | C64      | C65      | C73      | O64      | 16.5(6)        |
| C25      | C24      | C31      | O22      | -70.8(5)       | C65      | C64      | C71      | O61      | -107.6(5)      |
| C26      | O30      | C23A     | C23      | -176.8(3)      | C65      | C64      | C71      | O62      | 72.5(5)        |
| C26      | O30      | C23A     | C24      | 51.8(3)        | C65      | C66      | C66A     | C67      | -175.5(3)      |
| C26      | O30      | C23A     | C28C     | -54.3(3)       | C65      | C66      | C66A     | C68C     | -68.5(3)       |
| C26      | C25      | C33      | O23      | -11.7(6)       | C66      | O70      | C63A     | C63      | 177.9(3)       |
| C26      | C25      | C33      | O24      | 168.8(3)       | C66      | O70      | C63A     | C64      | -51.9(3)       |
| C26      | C26A     | C27      | O29      | -71.9(4)       | C66      | O70      | C63A     | C68C     | 54.8(3)        |
| C26      | C26A     | C27      | C27A     | -178.5(3)      | C66      | C65      | C73      | O63      | 6.3(6)         |
| C26      | C26A     | C28C     | C23A     | 1.8(4)         | C66      | C65      | C73      | O64      | -172.7(3)      |
| C26      | C26A     | C28C     | C28B     | 118.4(3)       | C66      | C66A     | C67      | O69      | 73.3(4)        |
| C27A     | O28      | C28A     | C28B     | 91.2(4)        | C66      | C66A     | C67      | C67A     | 179.8(3)       |
| C27      | O29      | C28B     | C21      | 175.0(3)       | C66      | C66A     | C68C     | C63A     | -2.3(3)        |
| C27      | O29      | C28B     | C28A     | -53.2(3)       | C66      | C66A     | C68C     | C68B     | -118.4(3)      |
| C27      | O29      | C28B     | C28C     | 52.9(3)        | C66A     | C67      | C67A     | O68      | -138.1(3)      |
| C27      | C26A     | C26      | O30      | 71.7(4)        | C66A     | C67      | C67A     | C68A     | -76.2(3)       |

| <b>A</b> | <b>B</b> | <b>C</b> | <b>D</b> | <b>Angle/°</b> | <b>A</b> | <b>B</b> | <b>C</b> | <b>D</b> | <b>Angle/°</b> |
|----------|----------|----------|----------|----------------|----------|----------|----------|----------|----------------|
| C27      | C26A     | C26      | C25      | 176.8(3)       | C67      | O69      | C68B     | C61      | -174.5(3)      |
| C27      | C26A     | C28C     | C23A     | -119.0(3)      | C67      | O69      | C68B     | C68A     | 53.3(3)        |
| C27      | C26A     | C28C     | C28B     | -2.3(3)        | C67      | O69      | C68B     | C68C     | -53.3(3)       |
| C27      | C27A     | C28A     | O28      | 109.6(3)       | C67      | C66A     | C68C     | C63A     | 117.4(3)       |
| C27      | C27A     | C28A     | C28B     | -1.3(4)        | C67      | C66A     | C68C     | C68B     | 1.3(3)         |
| C28B     | O29      | C27      | C26A     | -55.5(3)       | C67      | C67A     | C68A     | O68      | -109.6(3)      |
| C28B     | O29      | C27      | C27A     | 52.3(3)        | C67      | C67A     | C68A     | C68B     | 1.2(4)         |
| C28A     | O28      | C27A     | C27      | -91.9(4)       | C67A     | O68      | C68A     | C68B     | -91.4(3)       |
| C28A     | C27A     | C27      | O29      | -31.3(4)       | C67A     | C68A     | C68B     | O69      | -33.5(4)       |
| C28A     | C27A     | C27      | C26A     | 76.5(4)        | C67A     | C68A     | C68B     | C61      | -158.0(3)      |
| C28A     | C28B     | C28C     | C23A     | -175.5(3)      | C67A     | C68A     | C68B     | C68C     | 72.6(3)        |
| C28A     | C28B     | C28C     | C26A     | 75.1(3)        | C68A     | O68      | C67A     | C67      | 92.0(4)        |
| C28C     | C23A     | C24      | C25      | 72.4(4)        | C68A     | C68B     | C68C     | C63A     | 177.4(3)       |
| C28C     | C23A     | C24      | C31      | -95.8(4)       | C68A     | C68B     | C68C     | C66A     | -73.8(3)       |
| C28C     | C26A     | C26      | O30      | -35.5(3)       | C68B     | O69      | C67      | C66A     | 55.2(3)        |
| C28C     | C26A     | C26      | C25      | 69.6(3)        | C68B     | O69      | C67      | C67A     | -52.6(3)       |
| C28C     | C26A     | C27      | O29      | 35.0(3)        | C68C     | C63A     | C64      | C65      | -72.8(4)       |
| C28C     | C26A     | C27      | C27A     | -71.6(3)       | C68C     | C63A     | C64      | C71      | 99.6(4)        |
| C28C     | C28B     | C28A     | O28      | -134.9(3)      | C68C     | C66A     | C67      | O69      | -34.2(3)       |
| C28C     | C28B     | C28A     | C27A     | -72.9(3)       | C68C     | C66A     | C67      | C67A     | 72.4(3)        |
| C31      | C24      | C25      | C26      | 168.4(4)       | C71      | C64      | C65      | C66      | -172.5(4)      |
| C31      | C24      | C25      | C33      | 5.2(7)         | C71      | C64      | C65      | C73      | -0.3(7)        |
| C32      | O22      | C31      | O21      | 0.3(6)         | C72      | O62      | C71      | O61      | 6.0(6)         |
| C32      | O22      | C31      | C24      | -177.9(4)      | C72      | O62      | C71      | C64      | -174.1(3)      |
| C33      | C25      | C26      | O30      | -163.9(3)      | C73      | C65      | C66      | O70      | 154.9(4)       |
| C33      | C25      | C26      | C26A     | 88.8(4)        | C73      | C65      | C66      | C66A     | -98.7(4)       |
| C34      | O24      | C33      | O23      | -5.7(6)        | C74      | O64      | C73      | O63      | 4.6(6)         |
| C34      | O24      | C33      | C25      | 173.8(3)       | C74      | O64      | C73      | C65      | -176.4(3)      |

| <b>Atom</b> | <b>x</b> | <b>y</b> | <b>z</b> | <b>U(eq)</b> |
|-------------|----------|----------|----------|--------------|
| H2          | 6640(60) | 4820(50) | 3690(20) | 17           |
| H1A         | 8189.38  | 7143.57  | 3856.07  | 17           |
| H1B         | 7412.25  | 6028.65  | 4489.97  | 17           |
| H3A         | 7187.13  | 5198.71  | 2514.71  | 18           |
| H3B         | 8080.36  | 6604.23  | 2595.22  | 18           |

**Table S32 Hydrogen Atom Coordinates ( $\text{\AA}\times 10^4$ ) and Isotropic Displacement Parameters ( $\text{\AA}^2\times 10^3$ ) for 4.**

| Atom | x         | y        | z        | U(eq) |
|------|-----------|----------|----------|-------|
| H6A  | 1353.16   | 6248.8   | 3032.29  | 17    |
| H6AA | 2435.46   | 8543.53  | 3361.63  | 14    |
| H7A  | 1477.12   | 6708.38  | 4437.52  | 15    |
| H7AA | 2493.21   | 9165.59  | 4590.33  | 16    |
| H8AA | 5753.39   | 9207.13  | 4369.74  | 16    |
| H8CA | 5495.65   | 8599.11  | 3137.59  | 13    |
| H12A | 7150.73   | 11170.24 | 1088.8   | 40    |
| H12B | 8269.84   | 9915.52  | 848.83   | 40    |
| H12C | 6423.9    | 10216.11 | 580.08   | 40    |
| H14A | 2574.5    | 9849.16  | 243.32   | 41    |
| H14B | 870.5     | 8948.43  | 560.85   | 41    |
| H14C | 1315.92   | 10247.72 | 918.68   | 41    |
| H22  | -1090(60) | -150(50) | 3470(30) | 20    |
| H21A | -2034.42  | 976.13   | 4285.29  | 19    |
| H21B | -2471.9   | 2155.31  | 3699.98  | 19    |
| H23A | -1727.36  | 1737.65  | 2400.98  | 21    |
| H23B | -899.95   | 314.87   | 2252.03  | 21    |
| H26A | 3683.91   | 3397.83  | 3022.93  | 15    |
| H26B | 4772.25   | 1054.72  | 2665.83  | 18    |
| H27A | 2967.5    | 4064.04  | 4255.2   | 18    |
| H27B | 3965.43   | 1570.46  | 4095.57  | 17    |
| H28B | -209.88   | 4147.11  | 4118.54  | 16    |
| H28A | 733.15    | 3562.48  | 2891.71  | 14    |
| H32A | 253.7     | 6371.57  | 1045.79  | 43    |
| H32B | 697.74    | 5432.31  | 428.7    | 43    |
| H32C | -1090.5   | 5203.71  | 962.3    | 43    |
| H34A | 5809.92   | 4712.88  | -58.98   | 46    |
| H34B | 6129.74   | 5270.69  | 659.45   | 46    |
| H34C | 7231.81   | 4027.03  | 394.42   | 46    |
| H42  | 10800(60) | 4030(50) | 6540(30) | 21    |
| H41A | 12027.68  | 5644.49  | 5683.25  | 19    |
| H41B | 12465.74  | 6528.18  | 6278.02  | 19    |
| H43A | 11711.21  | 5497.46  | 7568.2   | 21    |
| H43B | 10878.88  | 4008.23  | 7710.29  | 21    |
| H46B | 5190.61   | 5009.97  | 7310.76  | 18    |
| H46A | 6342.78   | 7500.62  | 6949.71  | 15    |
| H47B | 6021.68   | 6184.49  | 5880.6   | 16    |

**Table S32 Hydrogen Atom Coordinates ( $\text{\AA}\times 10^4$ ) and Isotropic Displacement Parameters ( $\text{\AA}^2\times 10^3$ ) for 4.**

| Atom | x        | y        | z        | U(eq) |
|------|----------|----------|----------|-------|
| H47A | 7045.77  | 8734.23  | 5724.15  | 16    |
| H48B | 10209.97 | 8748.3   | 5858.92  | 16    |
| H48A | 9285.48  | 7578.22  | 7079.39  | 14    |
| H52A | 9941.8   | 9428.22  | 8945.11  | 49    |
| H52B | 9199.09  | 8250.28  | 9552.46  | 49    |
| H52C | 11098.68 | 8132.01  | 9112.32  | 49    |
| H54A | 4698.88  | 7550.64  | 10024.92 | 46    |
| H54B | 4048.17  | 8337.72  | 9336.03  | 46    |
| H54C | 3136.41  | 6936.12  | 9690.82  | 46    |
| H62  | 3320(60) | -790(50) | 6280(20) | 18    |
| H61A | 1785.48  | 1618.94  | 6137.12  | 17    |
| H61B | 2562.79  | 785.37   | 5508.31  | 17    |
| H63A | 2781.16  | -932.29  | 7494.46  | 19    |
| H63B | 1892.66  | 513.33   | 7408.67  | 19    |
| H66B | 8613.73  | 294.45   | 6950.17  | 18    |
| H66A | 7558.37  | 2760.36  | 6635.19  | 15    |
| H67B | 8501.53  | 1426.35  | 5548.06  | 17    |
| H67A | 7506.45  | 3960.6   | 5401.29  | 18    |
| H68B | 4238.26  | 3909.93  | 5621.18  | 17    |
| H68A | 4512.16  | 2745.72  | 6849.84  | 14    |
| H72A | 2986.08  | 4320.79  | 9004.46  | 42    |
| H72B | 1701.83  | 3033.12  | 9123.75  | 42    |
| H72C | 3415.8   | 3001.46  | 9505.56  | 42    |
| H74A | 7685.33  | 2241.73  | 9807.01  | 41    |
| H74B | 9375.68  | 1609.59  | 9395.86  | 41    |
| H74C | 8788.96  | 3099.79  | 9134.07  | 41    |

**Table S33 Crystal data and structure refinement for 5.**

|                     |                                           |
|---------------------|-------------------------------------------|
| Identification code | FZ1                                       |
| Empirical formula   | $\text{C}_{16}\text{H}_{18}\text{ClNO}_6$ |
| Formula weight      | 355.76                                    |
| Temperature/K       | 295(2)                                    |
| Crystal system      | monoclinic                                |
| Space group         | $P2_1/c$                                  |
| a/ $\text{\AA}$     | 7.8932(10)                                |
| b/ $\text{\AA}$     | 26.076(3)                                 |
| c/ $\text{\AA}$     | 8.2119(10)                                |



|                                               |                                                               |
|-----------------------------------------------|---------------------------------------------------------------|
| $\alpha/^\circ$                               | 90                                                            |
| $\beta/^\circ$                                | 107.482(14)                                                   |
| $\gamma/^\circ$                               | 90                                                            |
| Volume/ $\text{\AA}^3$                        | 1612.1(4)                                                     |
| Z                                             | 4                                                             |
| $\rho_{\text{calc}}/\text{cm}^3$              | 1.466                                                         |
| $\mu/\text{mm}^{-1}$                          | 0.270                                                         |
| F(000)                                        | 744.0                                                         |
| Crystal size/ $\text{mm}^3$                   | $0.42 \times 0.31 \times 0.2$                                 |
| Radiation                                     | MoK $\alpha$ ( $\lambda = 0.71073$ )                          |
| $2\Theta$ range for data collection/ $^\circ$ | 7.002 to 59.968                                               |
| Index ranges                                  | $-10 \leq h \leq 10, -36 \leq k \leq 36, -10 \leq l \leq 11$  |
| Reflections collected                         | 14665                                                         |
| Independent reflections                       | 4364 [ $R_{\text{int}} = 0.0670, R_{\text{sigma}} = 0.0649$ ] |
| Data/restraints/parameters                    | 4364/0/224                                                    |
| Goodness-of-fit on $F^2$                      | 1.082                                                         |
| Final R indexes [ $I \geq 2\sigma(I)$ ]       | $R_1 = 0.0691, wR_2 = 0.1751$                                 |
| Final R indexes [all data]                    | $R_1 = 0.0959, wR_2 = 0.2043$                                 |
| Largest diff. peak/hole / $e \text{\AA}^{-3}$ | 0.61/-0.40                                                    |

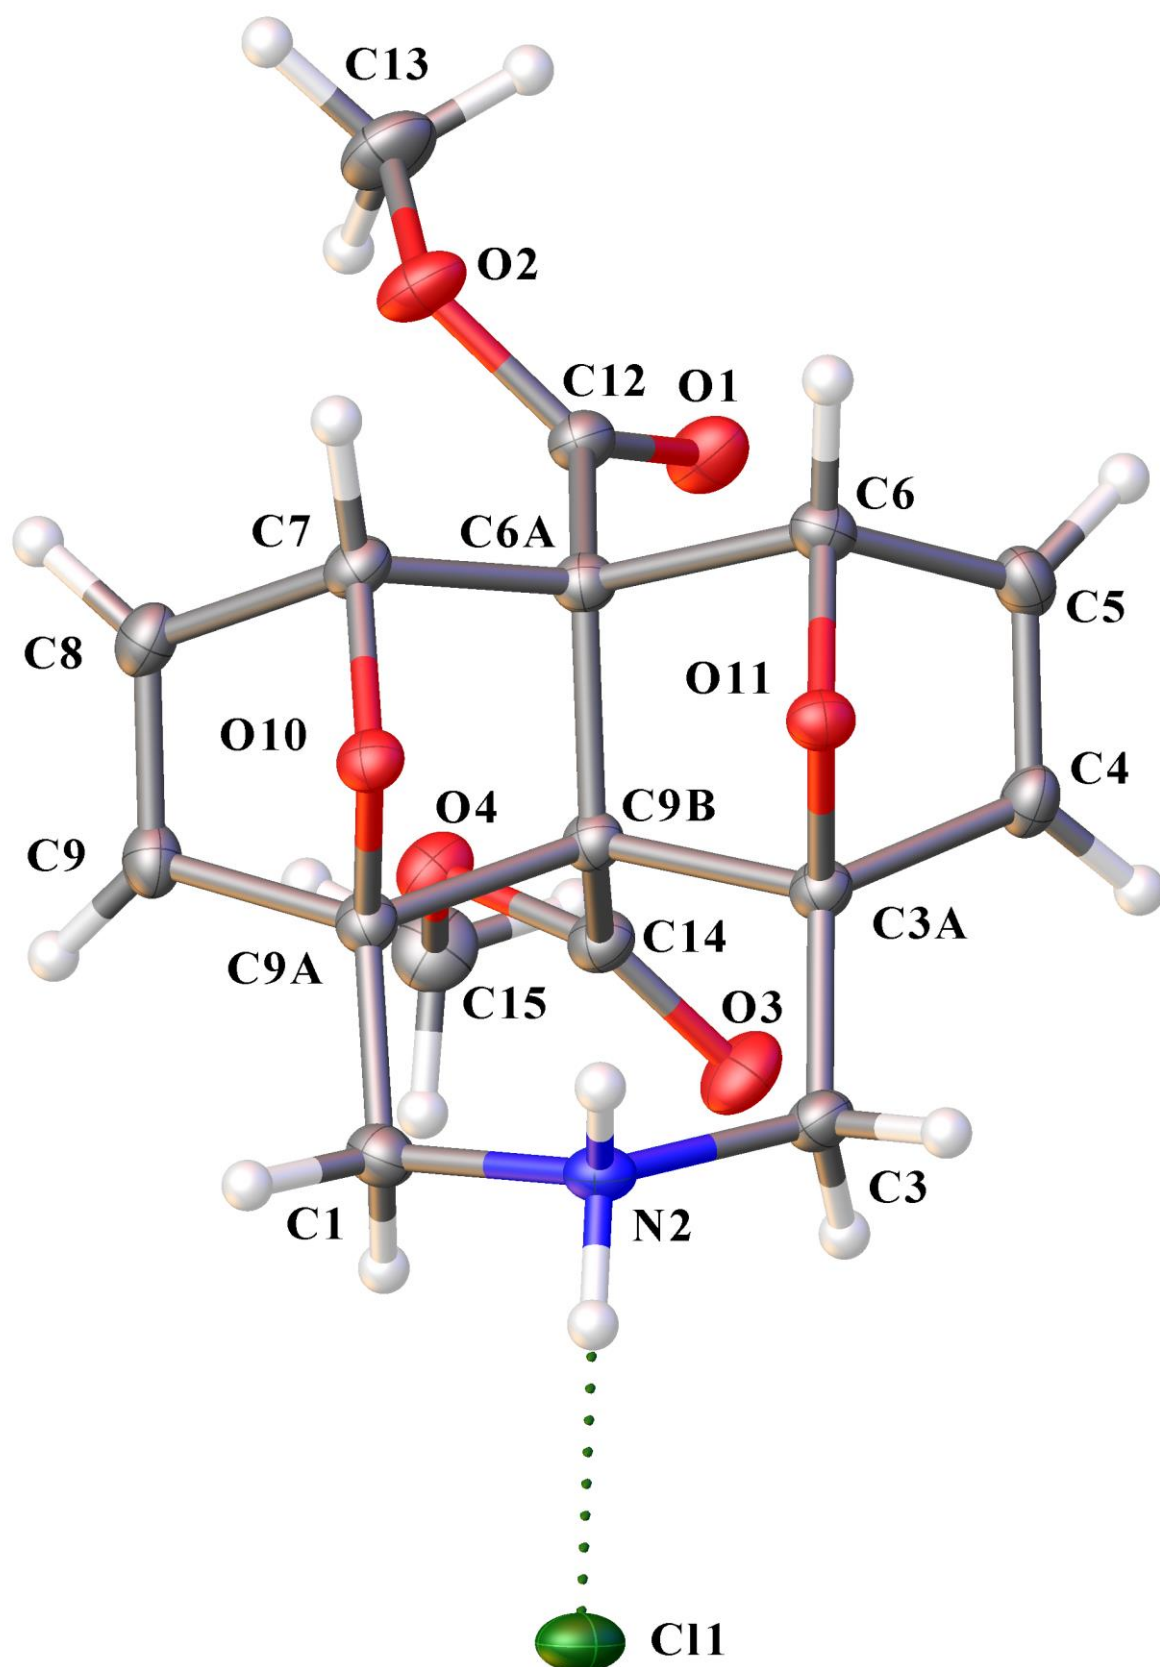

**Figure S8.** View of one molecule in the crystal of compound 5

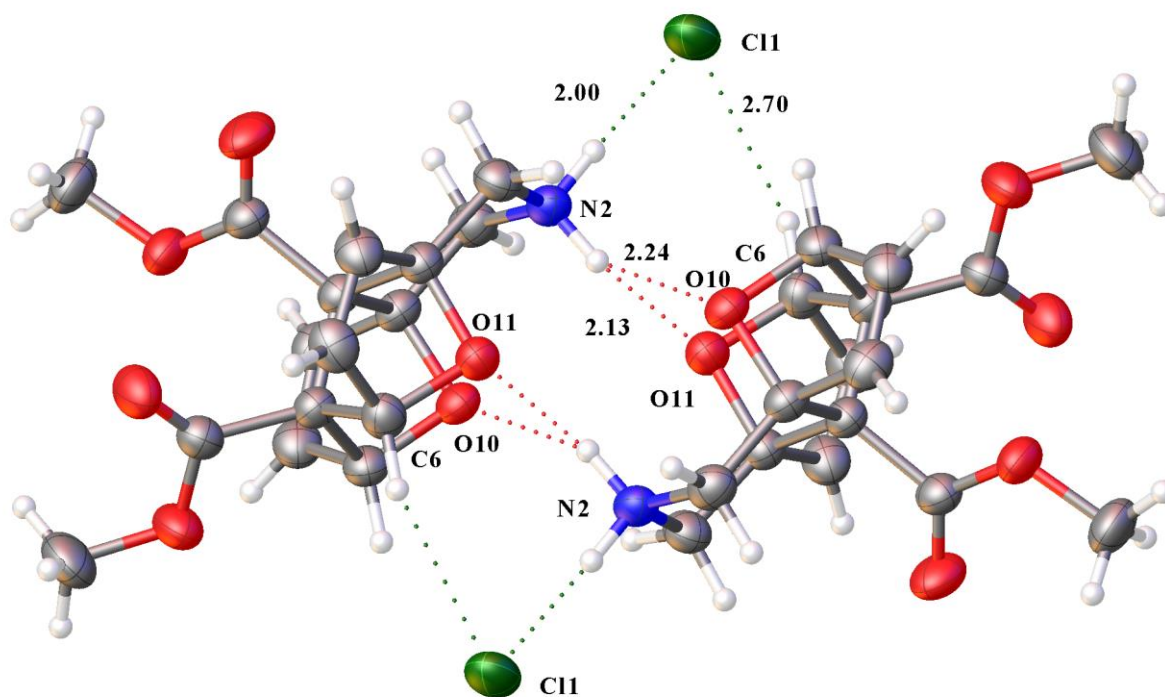

**Figure S9.** The H-bonds in the crystal of compound **5**. Non-bonded hydrogens are omitted for clarity.

**Table S34** Fractional Atomic Coordinates ( $\times 10^4$ ) and Equivalent Isotropic Displacement Parameters ( $\text{\AA}^2 \times 10^3$ ) for **5**.  $U_{eq}$  is defined as 1/3 of the trace of the orthogonalised  $U_{ij}$  tensor.

| Atom | <i>x</i>   | <i>y</i>   | <i>z</i>   | $U_{eq}$ |
|------|------------|------------|------------|----------|
| Cl1  | 10159.1(9) | 5746.8(3)  | 7676.4(10) | 52.0(3)  |
| O1   | 4628(3)    | 2797.2(7)  | 6434(3)    | 51.8(6)  |
| O2   | 2284(3)    | 3160.7(7)  | 6774(3)    | 53.1(6)  |
| O3   | 8788(3)    | 3480.4(8)  | 8108(3)    | 54.1(6)  |
| O4   | 6787(3)    | 3329.8(7)  | 9435(3)    | 43.7(5)  |
| O10  | 4170(2)    | 4587.2(6)  | 6772(2)    | 34.9(4)  |
| O11  | 5099(2)    | 4246.9(6)  | 4145(2)    | 35.6(4)  |
| N2   | 7470(3)    | 4931.8(8)  | 6693(3)    | 36.3(5)  |
| C1   | 7096(4)    | 4799.8(10) | 8368(3)    | 39.2(6)  |
| C3   | 8007(3)    | 4494.0(9)  | 5782(4)    | 38.6(6)  |
| C3A  | 6684(3)    | 4076.1(9)  | 5387(3)    | 33.0(5)  |
| C4   | 6979(4)    | 3587.0(9)  | 4467(4)    | 40.7(6)  |
| C5   | 5451(4)    | 3396.7(10) | 3724(4)    | 42.4(6)  |
| C6   | 4192(4)    | 3771.0(9)  | 4084(3)    | 36.6(5)  |
| C6A  | 4250(3)    | 3715.1(9)  | 6115(3)    | 32.7(5)  |
| C7   | 3176(3)    | 4131.2(9)  | 6752(3)    | 36.8(5)  |
| C8   | 3474(4)    | 4058.9(10) | 8732(4)    | 41.8(6)  |
| C9   | 5047(4)    | 4223.9(9)  | 9532(4)    | 40.1(6)  |
| C9A  | 5706(3)    | 4401.9(9)  | 8028(3)    | 33.8(5)  |

**Table S34 Fractional Atomic Coordinates ( $\times 10^4$ ) and Equivalent Isotropic Displacement Parameters ( $\text{\AA}^2 \times 10^3$ ) for 5.  $U_{eq}$  is defined as 1/3 of the trace of the orthogonalised  $U_{ij}$  tensor.**

| Atom | <i>x</i> | <i>y</i>   | <i>z</i> | $U_{eq}$ |
|------|----------|------------|----------|----------|
| C9B  | 6095(3)  | 3912.3(8)  | 7029(3)  | 31.4(5)  |
| C12  | 3802(3)  | 3173.2(9)  | 6469(3)  | 37.1(5)  |
| C13  | 1760(5)  | 2672.8(12) | 7262(6)  | 65.1(10) |
| C14  | 7383(3)  | 3550.4(9)  | 8231(3)  | 36.2(5)  |
| C15  | 7900(5)  | 2966.1(11) | 10591(4) | 53.8(8)  |

**Table S35 Anisotropic Displacement Parameters ( $\text{\AA}^2 \times 10^3$ ) for 5. The Anisotropic displacement factor exponent takes the form:  $-2\pi^2[h^2a^*U_{11}+2hka^*b^*U_{12}+\dots]$ .**

| Atom | $U_{11}$ | $U_{22}$ | $U_{33}$ | $U_{23}$ | $U_{13}$ | $U_{12}$  |
|------|----------|----------|----------|----------|----------|-----------|
| C11  | 38.0(4)  | 58.3(5)  | 51.6(5)  | 1.7(3)   | 1.5(3)   | -12.6(3)  |
| O1   | 49.0(12) | 34.9(10) | 75.9(16) | 1.6(9)   | 25.5(11) | 0.8(8)    |
| O2   | 35.6(10) | 45.4(11) | 81.6(16) | 9.3(10)  | 22.7(11) | -2.3(8)   |
| O3   | 36.2(11) | 62.5(13) | 65.8(14) | 15.2(10) | 18.7(10) | 17.8(9)   |
| O4   | 37.6(10) | 45.5(10) | 47.4(11) | 15.0(8)  | 12.0(9)  | 9.2(7)    |
| O10  | 29.7(8)  | 33.4(9)  | 39.7(9)  | 3.1(7)   | 7.6(7)   | 6.2(6)    |
| O11  | 33.2(9)  | 35.2(9)  | 36.2(9)  | 3.2(7)   | 7.4(7)   | -0.7(6)   |
| N2   | 29.5(10) | 34.5(11) | 40.5(12) | 1.0(8)   | 3.6(9)   | -1.9(8)   |
| C1   | 36.8(13) | 37.8(13) | 40.0(14) | -3.8(10) | 6.7(11)  | 1.1(10)   |
| C3   | 31.7(12) | 40.5(13) | 45.4(14) | 0.1(11)  | 14.3(11) | -2.5(9)   |
| C3A  | 29.9(11) | 32.0(12) | 37.1(12) | 0.8(9)   | 10.1(9)  | 2.4(8)    |
| C4   | 42.0(14) | 38.2(13) | 48.3(15) | -1.6(11) | 23.1(12) | 3.7(10)   |
| C5   | 51.1(16) | 38.9(13) | 40.2(14) | -7.6(11) | 18.3(13) | -4.0(11)  |
| C6   | 37.4(13) | 35.6(12) | 35.2(13) | 0.1(9)   | 8.4(10)  | -2.7(9)   |
| C6A  | 30.2(11) | 32.2(12) | 34.0(12) | 2.1(9)   | 7.4(9)   | 2.1(8)    |
| C7   | 29.1(11) | 37.3(13) | 44.6(14) | 3.1(10)  | 12.1(10) | 3.1(9)    |
| C8   | 40.7(14) | 41.8(14) | 48.9(15) | 2.1(11)  | 22.7(12) | 5.3(10)   |
| C9   | 43.4(14) | 43.0(14) | 36.4(13) | 0.1(10)  | 15.8(11) | 8.9(10)   |
| C9A  | 30.9(11) | 35.4(12) | 33.9(12) | 0.9(9)   | 8.1(10)  | 5.2(9)    |
| C9B  | 29.0(11) | 29.7(11) | 35.4(12) | 0.7(9)   | 9.6(9)   | 3.6(8)    |
| C12  | 33.0(12) | 38.3(13) | 40.0(14) | -0.1(10) | 11.0(11) | -2.5(9)   |
| C13  | 53.8(19) | 56.7(19) | 93(3)    | 10.4(17) | 34(2)    | -12.5(14) |
| C14  | 30.3(12) | 35.1(12) | 42.4(14) | 0.7(10)  | 9.8(10)  | 3.9(9)    |
| C15  | 53.0(17) | 50.6(17) | 54.1(18) | 18.7(13) | 10.3(15) | 16.4(13)  |

| Atom | Atom | Length/Å | Atom | Atom | Length/Å |
|------|------|----------|------|------|----------|
| O1   | C12  | 1.182(3) | C3A  | C4   | 1.535(3) |
| O2   | C12  | 1.297(3) | C3A  | C9B  | 1.611(3) |
| O2   | C13  | 1.431(4) | C4   | C5   | 1.277(4) |
| O3   | C14  | 1.158(3) | C5   | C6   | 1.485(4) |
| O4   | C14  | 1.345(3) | C6   | C6A  | 1.662(3) |
| O4   | C15  | 1.439(3) | C6A  | C7   | 1.560(3) |
| O10  | C7   | 1.422(3) | C6A  | C9B  | 1.514(3) |
| O10  | C9A  | 1.420(3) | C6A  | C12  | 1.506(3) |
| O11  | C3A  | 1.427(3) | C7   | C8   | 1.583(4) |
| O11  | C6   | 1.426(3) | C8   | C9   | 1.291(4) |
| N2   | C1   | 1.530(3) | C9   | C9A  | 1.548(4) |
| N2   | C3   | 1.494(3) | C9A  | C9B  | 1.597(3) |
| C1   | C9A  | 1.475(4) | C9B  | C14  | 1.515(3) |
| C3   | C3A  | 1.476(3) |      |      |          |

| Atom | Atom | Atom | Angle/°    | Atom | Atom | Atom | Angle/°    |
|------|------|------|------------|------|------|------|------------|
| C12  | O2   | C13  | 116.0(2)   | O10  | C7   | C6A  | 103.42(18) |
| C14  | O4   | C15  | 119.2(2)   | O10  | C7   | C8   | 100.2(2)   |
| C9A  | O10  | C7   | 94.10(17)  | C6A  | C7   | C8   | 109.5(2)   |
| C6   | O11  | C3A  | 94.40(17)  | C9   | C8   | C7   | 107.8(2)   |
| C3   | N2   | C1   | 116.0(2)   | C8   | C9   | C9A  | 101.3(2)   |
| C9A  | C1   | N2   | 108.8(2)   | O10  | C9A  | C1   | 108.8(2)   |
| C3A  | C3   | N2   | 112.71(19) | O10  | C9A  | C9   | 105.27(19) |
| O11  | C3A  | C3   | 109.69(19) | O10  | C9A  | C9B  | 98.81(18)  |
| O11  | C3A  | C4   | 97.9(2)    | C1   | C9A  | C9   | 118.0(2)   |
| O11  | C3A  | C9B  | 105.62(17) | C1   | C9A  | C9B  | 114.4(2)   |
| C3   | C3A  | C4   | 121.3(2)   | C9   | C9A  | C9B  | 109.44(19) |
| C3   | C3A  | C9B  | 112.0(2)   | C6A  | C9B  | C3A  | 98.73(19)  |
| C4   | C3A  | C9B  | 108.42(18) | C6A  | C9B  | C9A  | 102.77(17) |
| C5   | C4   | C3A  | 107.3(2)   | C6A  | C9B  | C14  | 117.9(2)   |
| C4   | C5   | C6   | 104.0(2)   | C9A  | C9B  | C3A  | 111.52(17) |
| O11  | C6   | C5   | 102.7(2)   | C14  | C9B  | C3A  | 113.88(18) |
| O11  | C6   | C6A  | 100.29(18) | C14  | C9B  | C9A  | 111.0(2)   |
| C5   | C6   | C6A  | 108.9(2)   | O1   | C12  | O2   | 122.1(2)   |
| C7   | C6A  | C6   | 114.93(19) | O1   | C12  | C6A  | 127.7(2)   |
| C9B  | C6A  | C6   | 101.53(18) | O2   | C12  | C6A  | 110.2(2)   |

| Atom | Atom | Atom | Angle/°    | Atom | Atom | Atom | Angle/°  |
|------|------|------|------------|------|------|------|----------|
| C9B  | C6A  | C7   | 97.83(18)  | O3   | C14  | O4   | 123.5(2) |
| C12  | C6A  | C6   | 109.78(19) | O3   | C14  | C9B  | 121.0(2) |
| C12  | C6A  | C7   | 113.93(19) | O4   | C14  | C9B  | 115.5(2) |
| C12  | C6A  | C9B  | 118.0(2)   |      |      |      |          |

| D   | H    | A                | d(D-H)/Å | d(H-A)/Å | d(D-A)/Å | D-H-A/° |
|-----|------|------------------|----------|----------|----------|---------|
| N2  | H2A  | O10 <sup>1</sup> | 0.93(3)  | 2.24(3)  | 3.022(3) | 141(2)  |
| N2  | H2A  | O11 <sup>1</sup> | 0.93(3)  | 2.14(3)  | 2.887(3) | 137(3)  |
| N2  | H2B  | C11              | 0.94(3)  | 2.00(3)  | 2.940(2) | 178(3)  |
| C1  | H1A  | C11 <sup>2</sup> | 0.97     | 2.74     | 3.612(3) | 149.8   |
| C3  | H3A  | C11 <sup>3</sup> | 0.97     | 2.85     | 3.609(3) | 136.2   |
| C6  | H6A  | C11 <sup>1</sup> | 0.98     | 2.70     | 3.533(3) | 143.4   |
| C13 | H13A | O3 <sup>4</sup>  | 0.96     | 2.64     | 3.377(4) | 134.2   |

<sup>1</sup>1-X,1-Y,1-Z; <sup>2</sup>2-X,1-Y,2-Z; <sup>3</sup>2-X,1-Y,1-Z; <sup>4</sup>-1+X,+Y,+Z

| A   | B   | C   | D   | Angle/°     | A   | B   | C   | D   | Angle/°     |
|-----|-----|-----|-----|-------------|-----|-----|-----|-----|-------------|
| O10 | C7  | C8  | C9  | -33.5(2)    | C6  | C6A | C7  | C8  | -175.43(19) |
| O10 | C9A | C9B | C3A | 67.2(2)     | C6  | C6A | C9B | C3A | 3.56(19)    |
| O10 | C9A | C9B | C6A | -37.7(2)    | C6  | C6A | C9B | C9A | 118.10(18)  |
| O10 | C9A | C9B | C14 | -164.68(18) | C6  | C6A | C9B | C14 | -119.5(2)   |
| O11 | C3A | C4  | C5  | -36.5(3)    | C6  | C6A | C12 | O1  | 65.5(4)     |
| O11 | C3A | C9B | C6A | 33.3(2)     | C6  | C6A | C12 | O2  | -112.1(2)   |
| O11 | C3A | C9B | C9A | -74.2(2)    | C6A | C7  | C8  | C9  | 74.8(3)     |
| O11 | C3A | C9B | C14 | 159.23(19)  | C6A | C9B | C14 | O3  | 128.0(3)    |
| O11 | C6  | C6A | C7  | 65.1(2)     | C6A | C9B | C14 | O4  | -53.0(3)    |
| O11 | C6  | C6A | C9B | -39.2(2)    | C7  | O10 | C9A | C1  | 179.5(2)    |
| O11 | C6  | C6A | C12 | -164.87(19) | C7  | O10 | C9A | C9  | -53.2(2)    |
| N2  | C1  | C9A | O10 | -57.6(2)    | C7  | O10 | C9A | C9B | 59.86(18)   |
| N2  | C1  | C9A | C9  | -177.3(2)   | C7  | C6A | C9B | C3A | -113.97(18) |
| N2  | C1  | C9A | C9B | 51.8(3)     | C7  | C6A | C9B | C9A | 0.6(2)      |
| N2  | C3  | C3A | O11 | 67.6(3)     | C7  | C6A | C9B | C14 | 123.0(2)    |
| N2  | C3  | C3A | C4  | -179.4(2)   | C7  | C6A | C12 | O1  | -164.0(3)   |
| N2  | C3  | C3A | C9B | -49.3(3)    | C7  | C6A | C12 | O2  | 18.5(3)     |

| <b>A</b> | <b>B</b> | <b>C</b> | <b>D</b> | <b>Angle/°</b> | <b>A</b> | <b>B</b> | <b>C</b> | <b>D</b> | <b>Angle/°</b> |
|----------|----------|----------|----------|----------------|----------|----------|----------|----------|----------------|
| C1       | N2       | C3       | C3A      | 56.9(3)        | C7       | C8       | C9       | C9A      | 0.4(2)         |
| C1       | C9A      | C9B      | C3A      | -48.2(3)       | C8       | C9       | C9A      | O10      | 33.6(2)        |
| C1       | C9A      | C9B      | C6A      | -153.1(2)      | C8       | C9       | C9A      | C1       | 155.1(2)       |
| C1       | C9A      | C9B      | C14      | 80.0(3)        | C8       | C9       | C9A      | C9B      | -71.8(2)       |
| C3       | N2       | C1       | C9A      | -56.7(3)       | C9       | C9A      | C9B      | C3A      | 176.9(2)       |
| C3       | C3A      | C4       | C5       | -155.3(3)      | C9       | C9A      | C9B      | C6A      | 72.0(2)        |
| C3       | C3A      | C9B      | C6A      | 152.69(19)     | C9       | C9A      | C9B      | C14      | -55.0(3)       |
| C3       | C3A      | C9B      | C9A      | 45.2(3)        | C9A      | O10      | C7       | C6A      | -63.0(2)       |
| C3       | C3A      | C9B      | C14      | -81.4(2)       | C9A      | O10      | C7       | C8       | 50.04(19)      |
| C3A      | O11      | C6       | C5       | -53.7(2)       | C9A      | C9B      | C14      | O3       | -113.8(3)      |
| C3A      | O11      | C6       | C6A      | 58.55(19)      | C9A      | C9B      | C14      | O4       | 65.1(3)        |
| C3A      | C4       | C5       | C6       | 2.8(3)         | C9B      | C3A      | C4       | C5       | 73.0(3)        |
| C3A      | C9B      | C14      | O3       | 13.0(4)        | C9B      | C6A      | C7       | O10      | 37.3(2)        |
| C3A      | C9B      | C14      | O4       | -168.0(2)      | C9B      | C6A      | C7       | C8       | -68.8(2)       |
| C4       | C3A      | C9B      | C6A      | -70.8(2)       | C9B      | C6A      | C12      | O1       | -50.1(4)       |
| C4       | C3A      | C9B      | C9A      | -178.3(2)      | C9B      | C6A      | C12      | O2       | 132.3(2)       |
| C4       | C3A      | C9B      | C14      | 55.1(3)        | C12      | C6A      | C7       | O10      | 162.7(2)       |
| C4       | C5       | C6       | O11      | 32.3(3)        | C12      | C6A      | C7       | C8       | 56.6(3)        |
| C4       | C5       | C6       | C6A      | -73.4(3)       | C12      | C6A      | C9B      | C3A      | 123.6(2)       |
| C5       | C6       | C6A      | C7       | 172.5(2)       | C12      | C6A      | C9B      | C9A      | -121.9(2)      |
| C5       | C6       | C6A      | C9B      | 68.2(2)        | C12      | C6A      | C9B      | C14      | 0.5(3)         |
| C5       | C6       | C6A      | C12      | -57.5(3)       | C13      | O2       | C12      | O1       | 6.9(5)         |
| C6       | O11      | C3A      | C3       | 179.79(19)     | C13      | O2       | C12      | C6A      | -175.3(3)      |
| C6       | O11      | C3A      | C4       | 52.39(19)      | C15      | O4       | C14      | O3       | -3.3(4)        |
| C6       | O11      | C3A      | C9B      | -59.33(19)     | C15      | O4       | C14      | C9B      | 177.7(2)       |
| C6       | C6A      | C7       | O10      | -69.4(2)       |          |          |          |          |                |

| <b>Atom</b> | <b>x</b> | <b>y</b> | <b>z</b> | <b>U(eq)</b> |
|-------------|----------|----------|----------|--------------|
| H2A         | 6550(40) | 5102(11) | 5890(40) | 44           |
| H2B         | 8340(40) | 5189(11) | 7030(40) | 44           |
| H1A         | 8170.88  | 4675.04  | 9195.66  | 47           |
| H1B         | 6702.53  | 5103.62  | 8832.73  | 47           |
| H3A         | 8171.82  | 4618.36  | 4726.39  | 46           |
| H3B         | 9135.66  | 4359.5   | 6483.81  | 46           |
| H4A         | 8067.59  | 3453.95  | 4454.27  | 49           |

**Table S40 Hydrogen Atom Coordinates ( $\text{\AA} \times 10^4$ ) and Isotropic Displacement Parameters ( $\text{\AA}^2 \times 10^3$ ) for 5.**

| Atom | <i>x</i> | <i>y</i> | <i>z</i> | U(eq) |
|------|----------|----------|----------|-------|
| H5A  | 5187.99  | 3093.71  | 3100.83  | 51    |
| H6A  | 2995.84  | 3762.55  | 3268.44  | 44    |
| H7A  | 1925.76  | 4155.97  | 6069.23  | 44    |
| H8A  | 2661.57  | 3921.88  | 9230.97  | 50    |
| H9A  | 5627.89  | 4233.28  | 10698.44 | 48    |
| H13A | 625.51   | 2704.28  | 7458.45  | 98    |
| H13B | 1677.65  | 2428.85  | 6366.18  | 98    |
| H13C | 2626.43  | 2558.16  | 8289.13  | 98    |
| H15A | 7296.67  | 2843.12  | 11370.08 | 81    |
| H15B | 8154.01  | 2683.12  | 9953.77  | 81    |
| H15C | 8989.95  | 3129.29  | 11219.73 | 81    |

**Table S31. Hydrogen bonds with  $\text{H} \cdots \text{A} < r(\text{A}) + 2.000 \text{\AA}$  and  $\angle \text{DHA} > 110^\circ$  between molecules of compound 5**

| D-H    | d(D-H)  | d(H..A) | $\angle \text{DHA}$ | d(D..A)  | A                   |
|--------|---------|---------|---------------------|----------|---------------------|
| N1-H2A | 0.96(4) | 1.96(4) | 176(3)              | 2.939(3) | Cl1                 |
| N1-H2B | 0.95(3) | 2.14(3) | 133(3)              | 2.885(3) | O6 [1-x, 1-y, 1-z]  |
| N1-H2B | 0.95(3) | 2.20(3) | 143(3)              | 3.024(3) | O5 [1-x, 1-y, 1-z]  |
| C3-H3B | 1.07(4) | 2.75(3) | 137(3)              | 3.605(3) | Cl1 [2-x, 1-y, 1-z] |
| C5-H6  | 1.01(3) | 2.70(3) | 140(3)              | 3.532(3) | Cl1 [1-x, 1-y, 1-z] |
| C1-H1A | 1.04(3) | 2.67(3) | 150(3)              | 3.613(4) | Cl1 [2-x, 1-y, 2-z] |



|                                                                |                    |
|----------------------------------------------------------------|--------------------|
| <b>Formula</b> C <sub>16</sub> H <sub>21</sub> NO <sub>6</sub> | <b>FW</b> 323.3410 |
|----------------------------------------------------------------|--------------------|

|                                            |                                    |                                       |                                        |
|--------------------------------------------|------------------------------------|---------------------------------------|----------------------------------------|
| <b>Acquisition Time (sec)</b> 1.4549       | <b>Comment</b> single_pulse        | <b>Date</b> 15 Jan 2014 09:32:20      | <b>Date Stamp</b> 15 Jan 2014 08:41:42 |
| <b>File Name</b> H:\DOWNLOADS\FZ3515-1.JDF | <b>Frequency (MHz)</b> 600.17      | <b>Nucleus</b> 1H                     | <b>Number of Transients</b> 8          |
| <b>Origin</b> ECA 600                      | <b>Original Points Count</b> 16384 | <b>Owner</b> delta                    | <b>Points Count</b> 16384              |
| <b>Receiver Gain</b> 26.00                 | <b>Solvent</b> CHLOROFORM-d        | <b>Spectrum Offset (Hz)</b> 3019.2939 | <b>Sweep Width (Hz)</b> 11261.26       |
| <b>Temperature (degree C)</b> 24.100       |                                    |                                       |                                        |

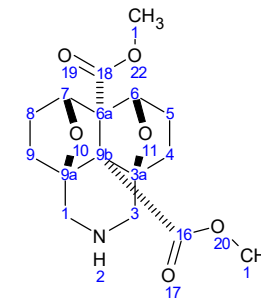

**1**

FZ3515-1.JDF

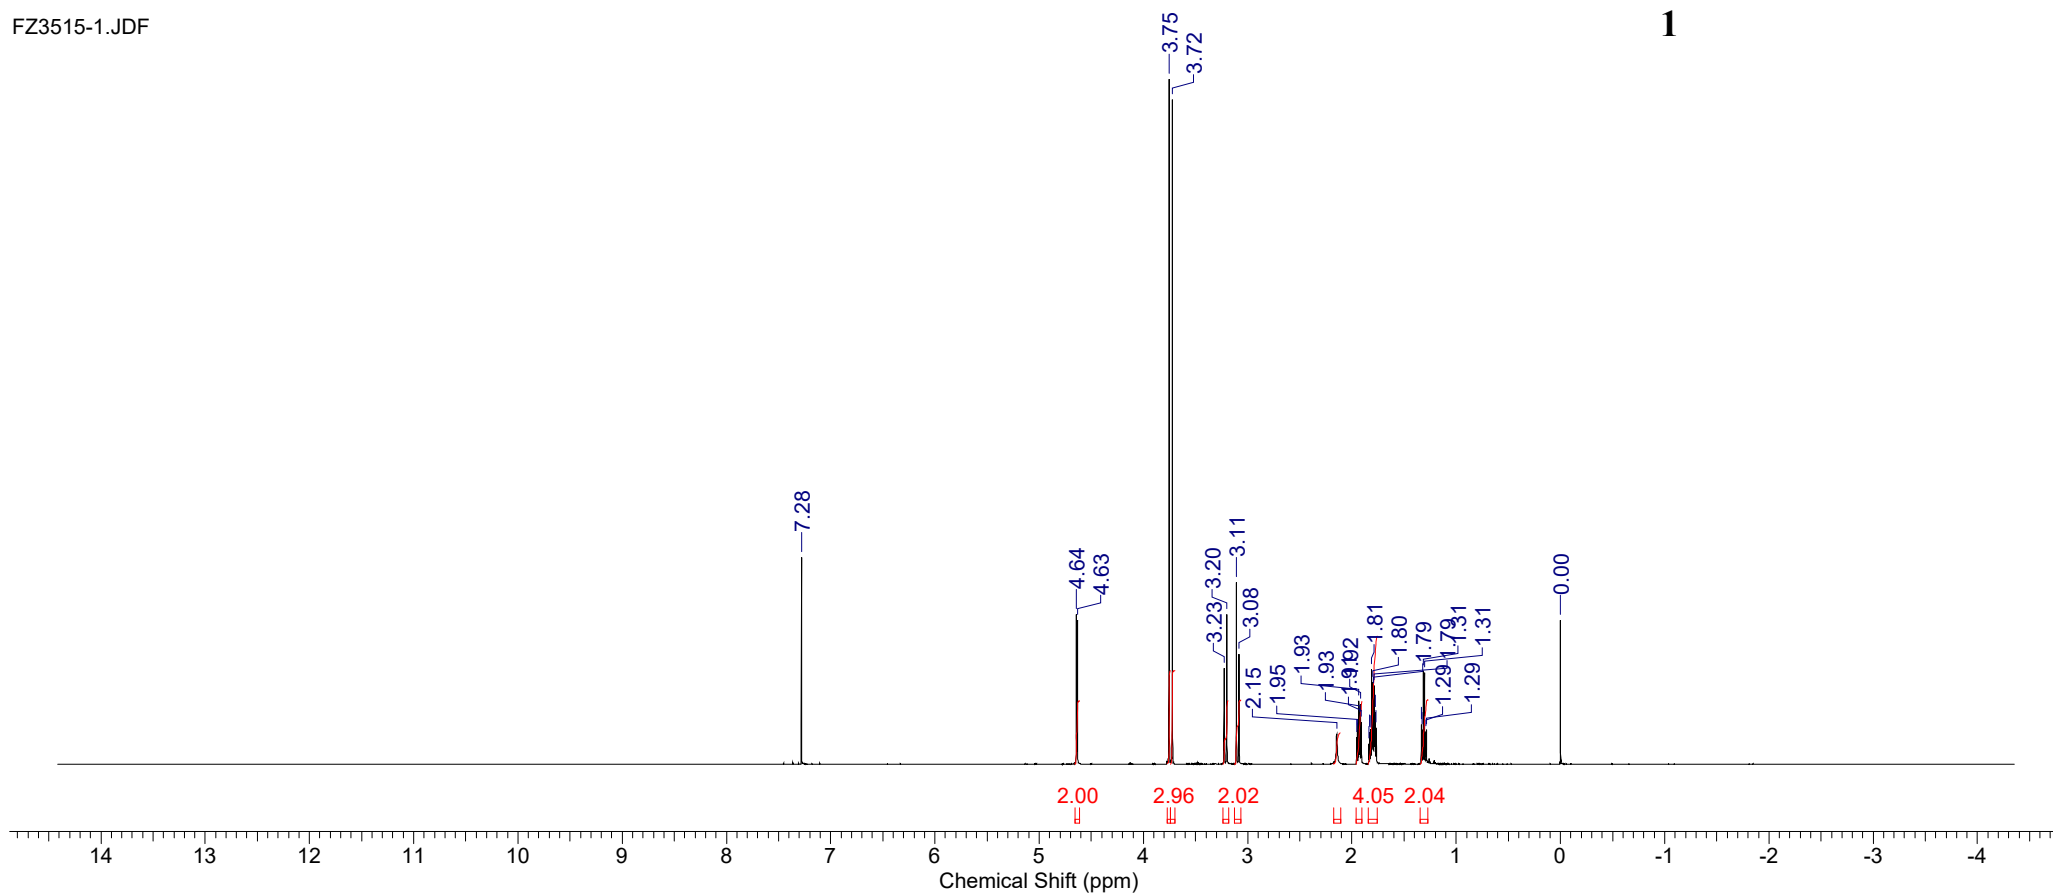

Formula C<sub>16</sub>H<sub>21</sub>NO<sub>6</sub> FW 323.3410

|                        |                           |                       |                 |                      |                      |                  |                      |                |                  |
|------------------------|---------------------------|-----------------------|-----------------|----------------------|----------------------|------------------|----------------------|----------------|------------------|
| Acquisition Time (sec) | 1.4549                    | Comment               | single pulse    | Date                 | 15 Jan 2014 09:32:20 | Date Stamp       | 15 Jan 2014 08:41:42 |                |                  |
| File Name              | H:\DOWNLOADS\FZ3515-1.JDF |                       | Frequency (MHz) | 600.17               | Nucleus              | 1H               | Number of Transients | 8              |                  |
| Origin                 | ECA 600                   | Original Points Count | 16384           | Owner                | delta                | Points Count     | 16384                | Pulse Sequence | single_pulse.ex2 |
| Receiver Gain          | 26.00                     | Solvent               | CHLOROFORM-d    | Spectrum Offset (Hz) | 3019.2939            | Sweep Width (Hz) | 11261.26             |                |                  |
| Temperature (degree C) | 24.100                    |                       |                 |                      |                      |                  |                      |                |                  |

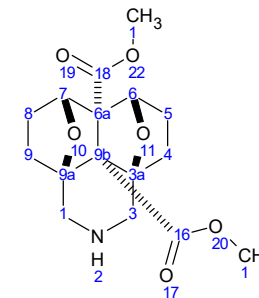

1

FZ3515-1.JDF

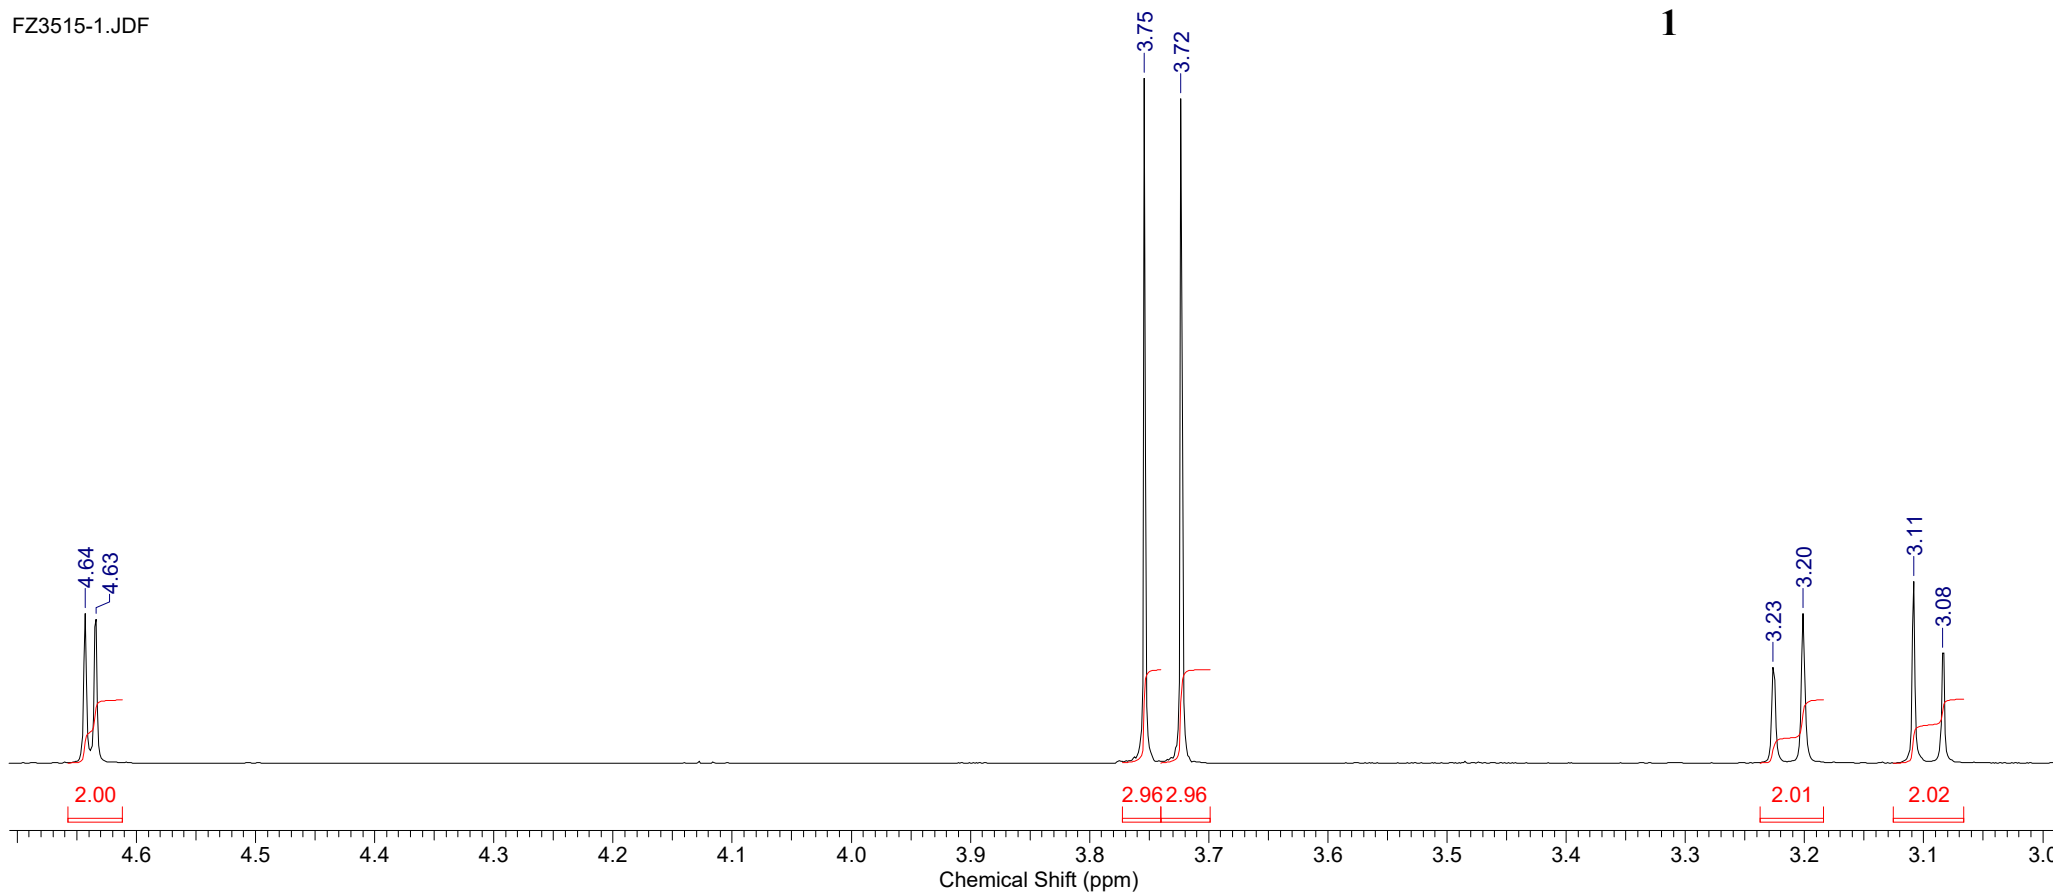

Formula C<sub>16</sub>H<sub>21</sub>NO<sub>6</sub> FW 323.3410

|                        |                           |                       |              |                      |                      |                      |                      |
|------------------------|---------------------------|-----------------------|--------------|----------------------|----------------------|----------------------|----------------------|
| Acquisition Time (sec) | 1.4549                    | Comment               | single_pulse | Date                 | 15 Jan 2014 09:32:20 | Date Stamp           | 15 Jan 2014 08:41:42 |
| File Name              | H:\DOWNLOADS\FZ3515-1.JDF | Frequency (MHz)       | 600.17       | Nucleus              | 1H                   | Number of Transients | 8                    |
| Origin                 | ECA 600                   | Original Points Count | 16384        | Owner                | delta                | Points Count         | 16384                |
| Receiver Gain          | 26.00                     | Solvent               | CHLOROFORM-d | Spectrum Offset (Hz) | 3019.2939            | Pulse Sequence       | single_pulse.ex2     |
| Temperature (degree C) | 24.100                    |                       |              |                      |                      | Sweep Width (Hz)     | 11261.26             |

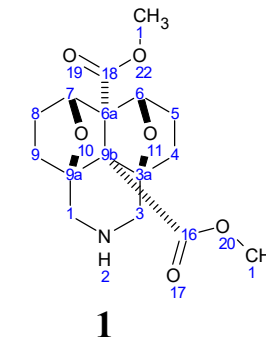

FZ3515-1.JDF

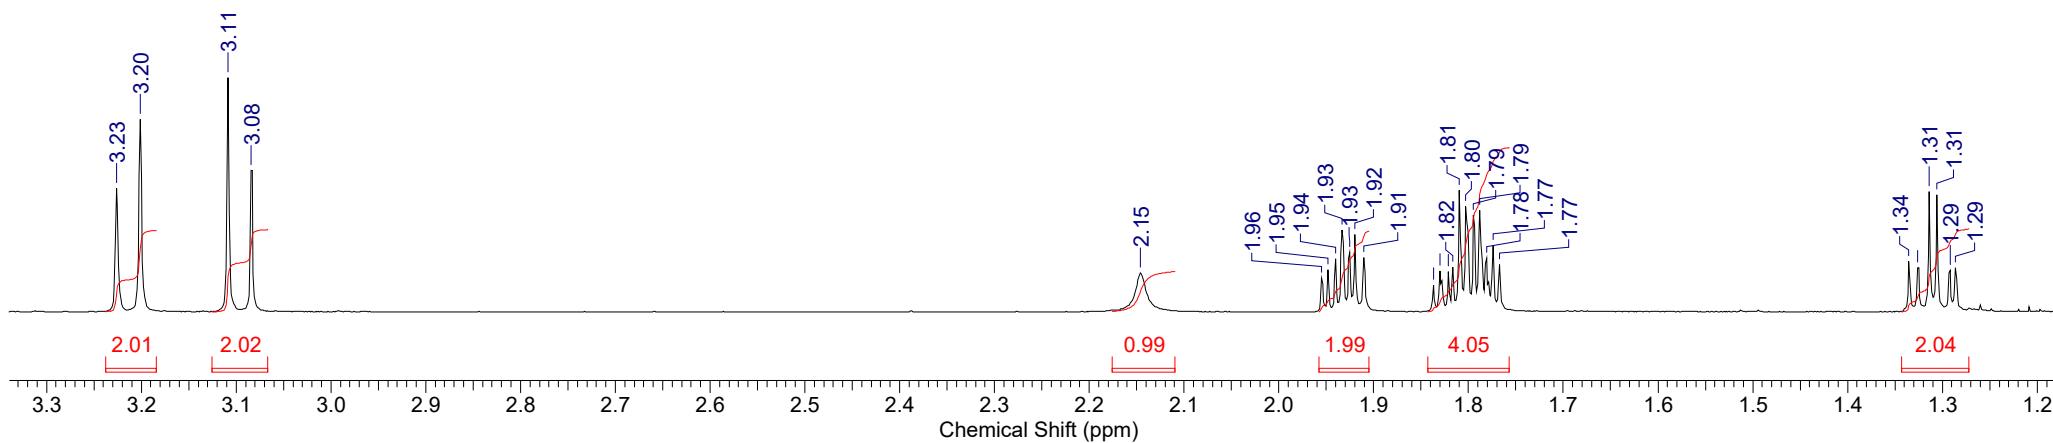

Formula C<sub>16</sub>H<sub>21</sub>NO<sub>6</sub> FW 323.3410

|                        |                      |                   |                                              |                        |                      |                |       |
|------------------------|----------------------|-------------------|----------------------------------------------|------------------------|----------------------|----------------|-------|
| Acquisition Time (sec) | 0.5571               | Comment           | 5 mm QNP 1H/15N/13C/31P Z3379/0400           | Date                   | 20 May 2014 10:25:04 |                |       |
| Date Stamp             | 20 May 2014 10:25:04 | File Name         | H:\DESKTOP\FZ-0414-N22-1170-C13DEC-1_001001r |                        |                      |                |       |
| Frequency (MHz)        | 100.61               | Nucleus           | 13C                                          | Number of Transients   | 214                  | Origin         | spect |
| Original Points Count  | 16384                | Owner             | root                                         | Points Count           | 65536                | Pulse Sequence | zgpg  |
| Receiver Gain          | 32768.00             | SW(cyclical) (Hz) | 29411.77                                     | Solvent                | CHLOROFORM-d         |                |       |
| Spectrum Offset (Hz)   | 9621.1436            | Sweep Width (Hz)  | 29411.32                                     | Temperature (degree C) | 27.000               |                |       |

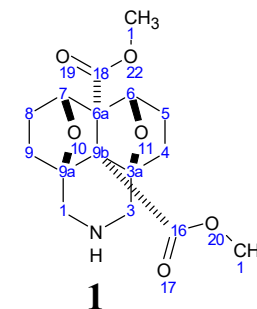

FZ-0414-N22-1170-C13DEC-1\_001001r

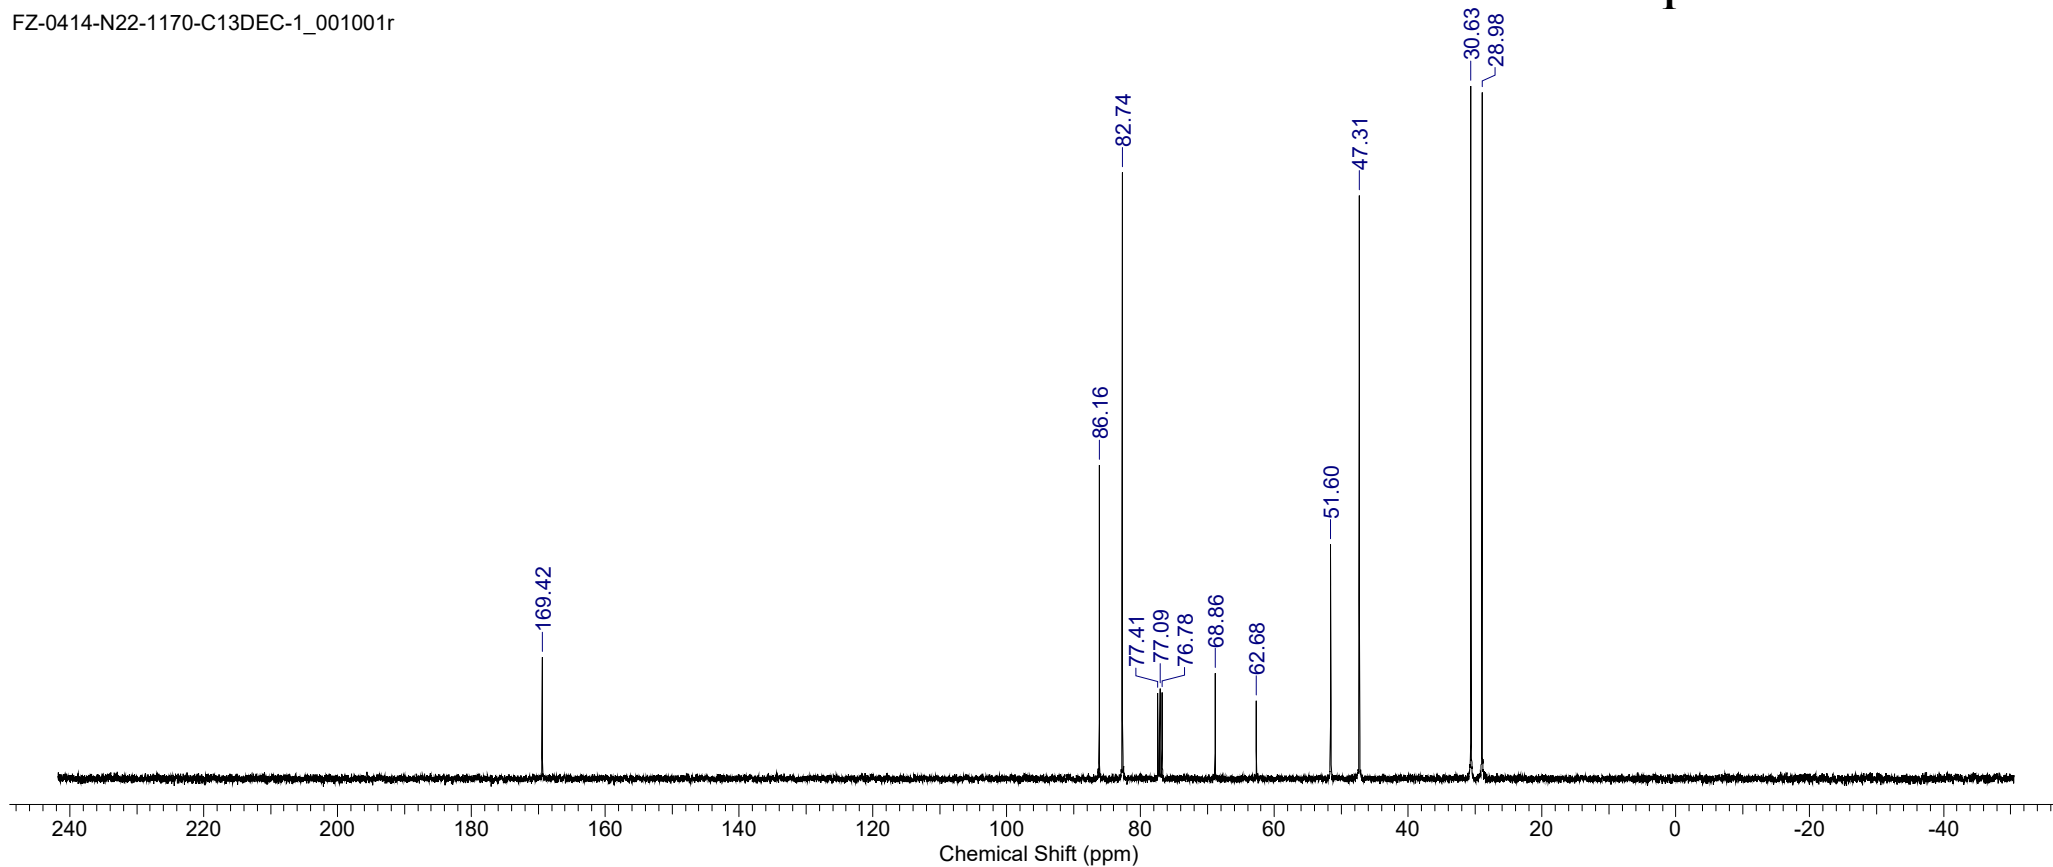

Formula C<sub>16</sub>H<sub>21</sub>NO<sub>6</sub> FW 323.3410

|                        |                      |                   |                                              |                        |                      |                |       |
|------------------------|----------------------|-------------------|----------------------------------------------|------------------------|----------------------|----------------|-------|
| Acquisition Time (sec) | 0.5571               | Comment           | 5 mm QNP 1H/15N/13C/31P Z3379/0400           | Date                   | 20 May 2014 10:25:04 |                |       |
| Date Stamp             | 20 May 2014 10:25:04 | File Name         | H:\DESKTOP\FZ-0414-N22-1170-C13DEC-1_001001r |                        |                      |                |       |
| Frequency (MHz)        | 100.61               | Nucleus           | 13C                                          | Number of Transients   | 214                  | Origin         | spect |
| Original Points Count  | 16384                | Owner             | root                                         | Points Count           | 65536                | Pulse Sequence | zgpg  |
| Receiver Gain          | 32768.00             | SW(cyclical) (Hz) | 29411.77                                     | Solvent                | CHLOROFORM-d         |                |       |
| Spectrum Offset (Hz)   | 9621.1436            | Sweep Width (Hz)  | 29411.32                                     | Temperature (degree C) | 27.000               |                |       |



FZ-0414-N22-1170-C13DEC-1\_001001r

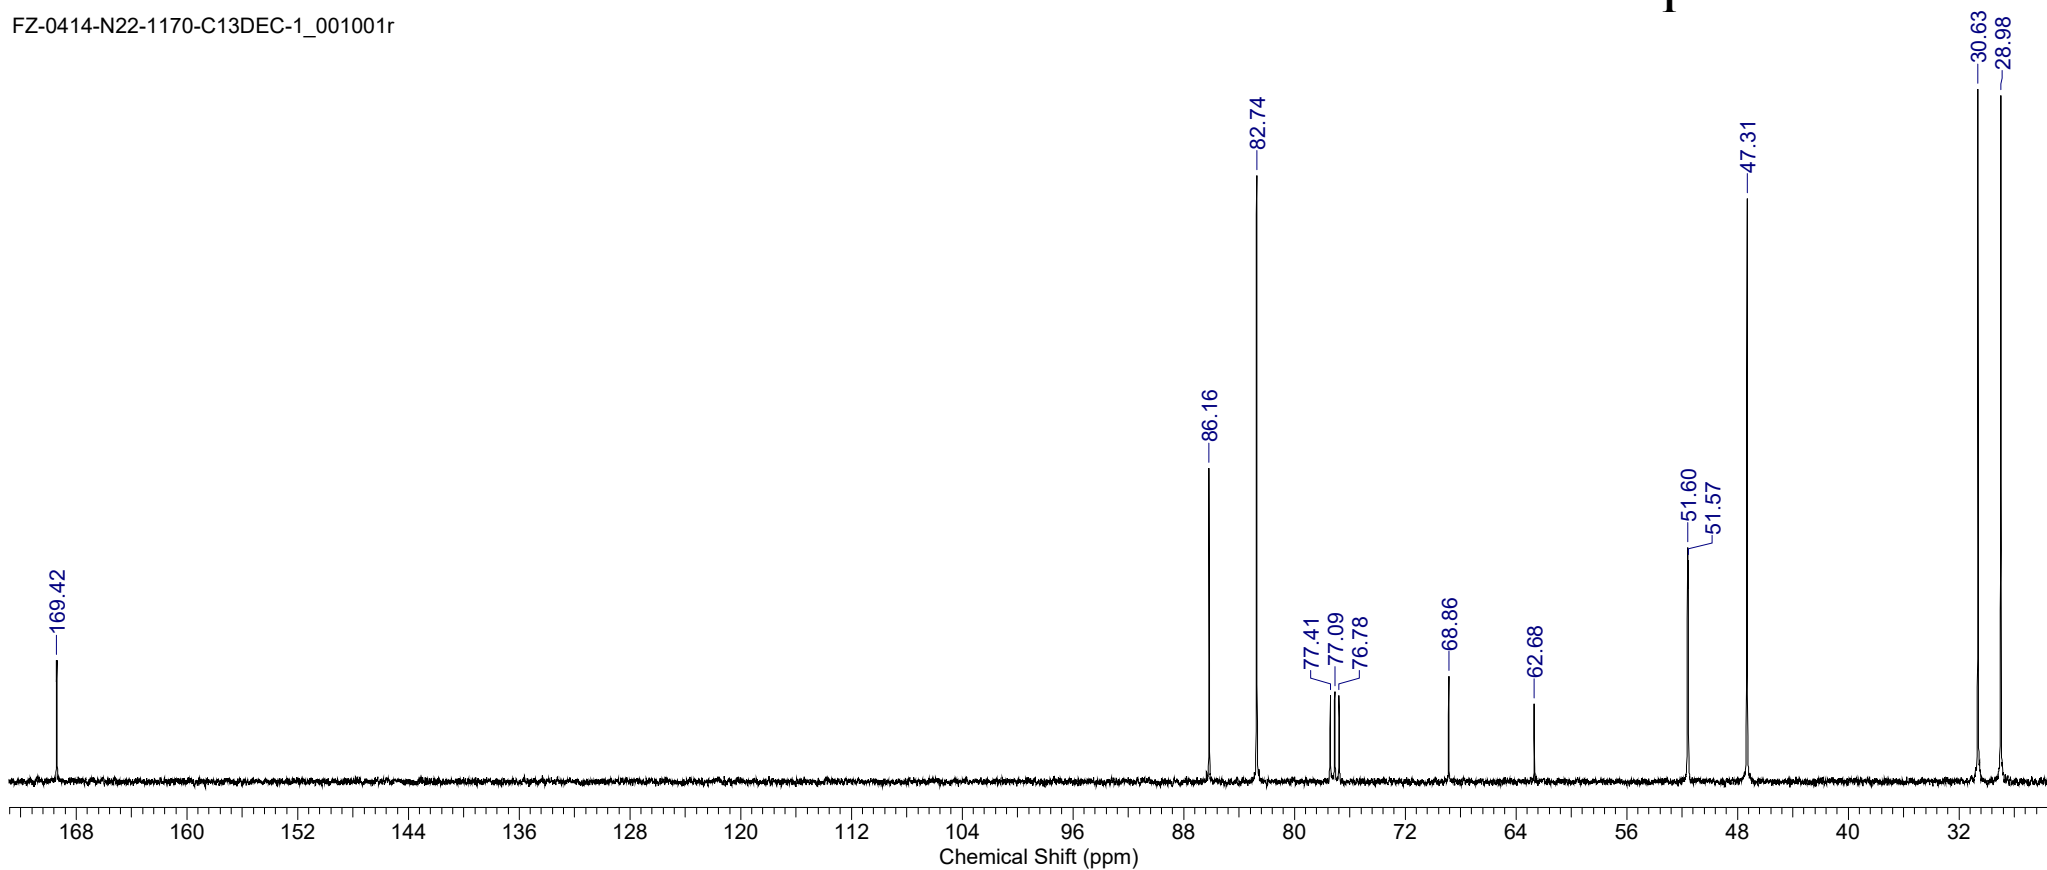

Formula C<sub>16</sub>H<sub>21</sub>NO<sub>6</sub> FW 323.3410

|                        |                      |                   |                                                                         |                        |                      |                |       |
|------------------------|----------------------|-------------------|-------------------------------------------------------------------------|------------------------|----------------------|----------------|-------|
| Acquisition Time (sec) | 1.6056               | Comment           | 5 mm QNP 1H/15N/13C/31P Z3379/0400                                      | Date                   | 26 Dec 2013 13:05:04 |                |       |
| Date Stamp             | 26 Dec 2013 13:05:04 | File Name         | H:\DESKTOP\ют РОМЫ домино NH восстановленный\FZ-251213-N11-1163_001001r |                        |                      |                |       |
| Frequency (MHz)        | 400.13               | Nucleus           | 1H                                                                      | Number of Transients   | 16                   | Origin         | spect |
| Original Points Count  | 16384                | Owner             | root                                                                    | Points Count           | 65536                | Pulse Sequence | zg    |
| Receiver Gain          | 64.00                | SW(cyclical) (Hz) | 10204.08                                                                | Solvent                | CHLOROFORM-d         |                |       |
| Spectrum Offset (Hz)   | 2651.9934            | Sweep Width (Hz)  | 10203.93                                                                | Temperature (degree C) | 27.000               |                |       |

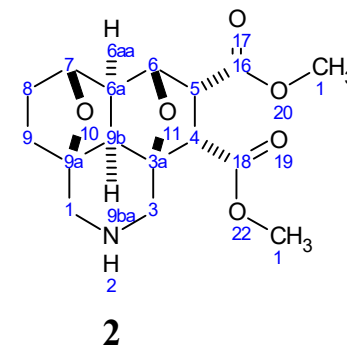

FZ-251213-N11-1163\_001001r

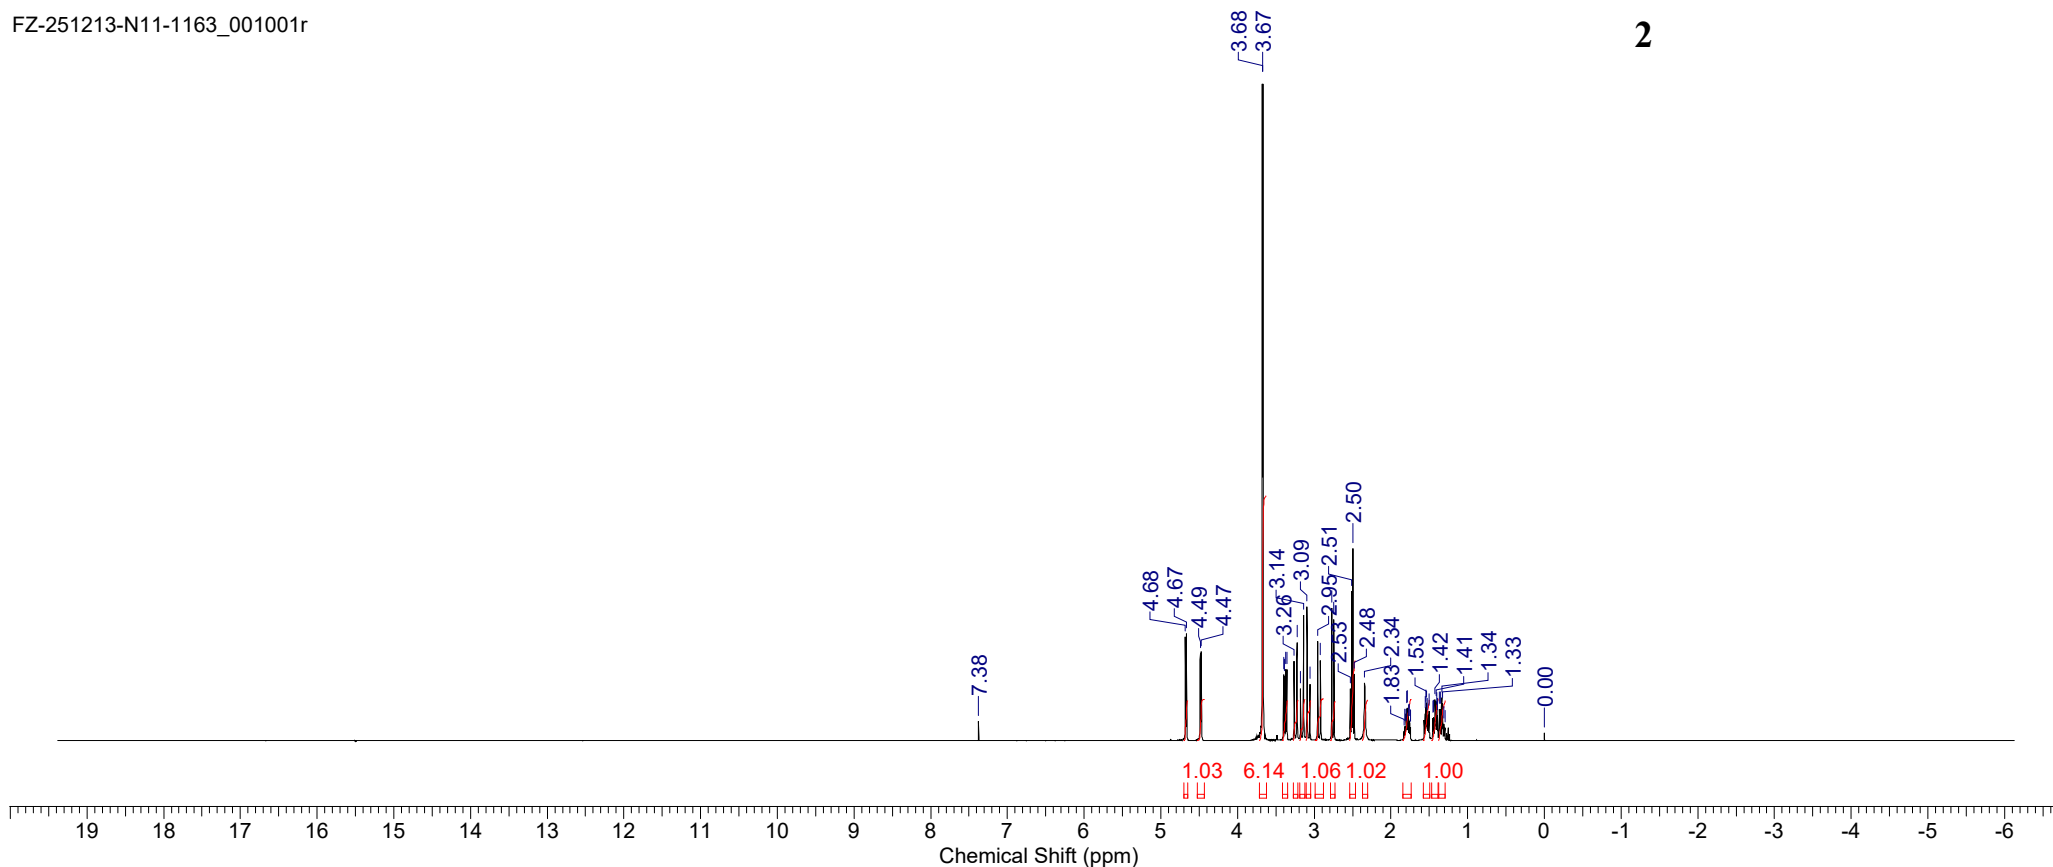

Formula C<sub>16</sub>H<sub>21</sub>NO<sub>6</sub> FW 323.3410

|                        |                      |                   |                                                                         |                        |                      |
|------------------------|----------------------|-------------------|-------------------------------------------------------------------------|------------------------|----------------------|
| Acquisition Time (sec) | 1.6056               | Comment           | 5 mm QNP 1H/15N/13C/31P Z3379/0400                                      | Date                   | 26 Dec 2013 13:05:04 |
| Date Stamp             | 26 Dec 2013 13:05:04 | File Name         | H:\DESKTOP\ют РОМЫ домино NH восстановленный\FZ-251213-N11-1163_001001r |                        |                      |
| Frequency (MHz)        | 400.13               | Nucleus           | 1H                                                                      | Number of Transients   | 16                   |
| Original Points Count  | 16384                | Owner             | root                                                                    | Points Count           | 65536                |
| Receiver Gain          | 64.00                | SW(cyclical) (Hz) | 10204.08                                                                | Solvent                | CHLOROFORM-d         |
| Spectrum Offset (Hz)   | 2651.9934            | Sweep Width (Hz)  | 10203.93                                                                | Temperature (degree C) | 27.000               |

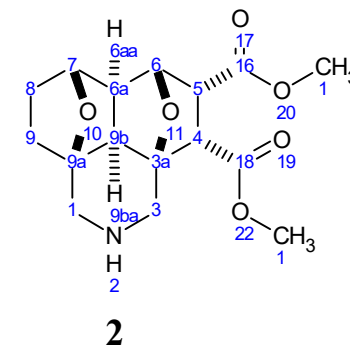

FZ-251213-N11-1163\_001001r

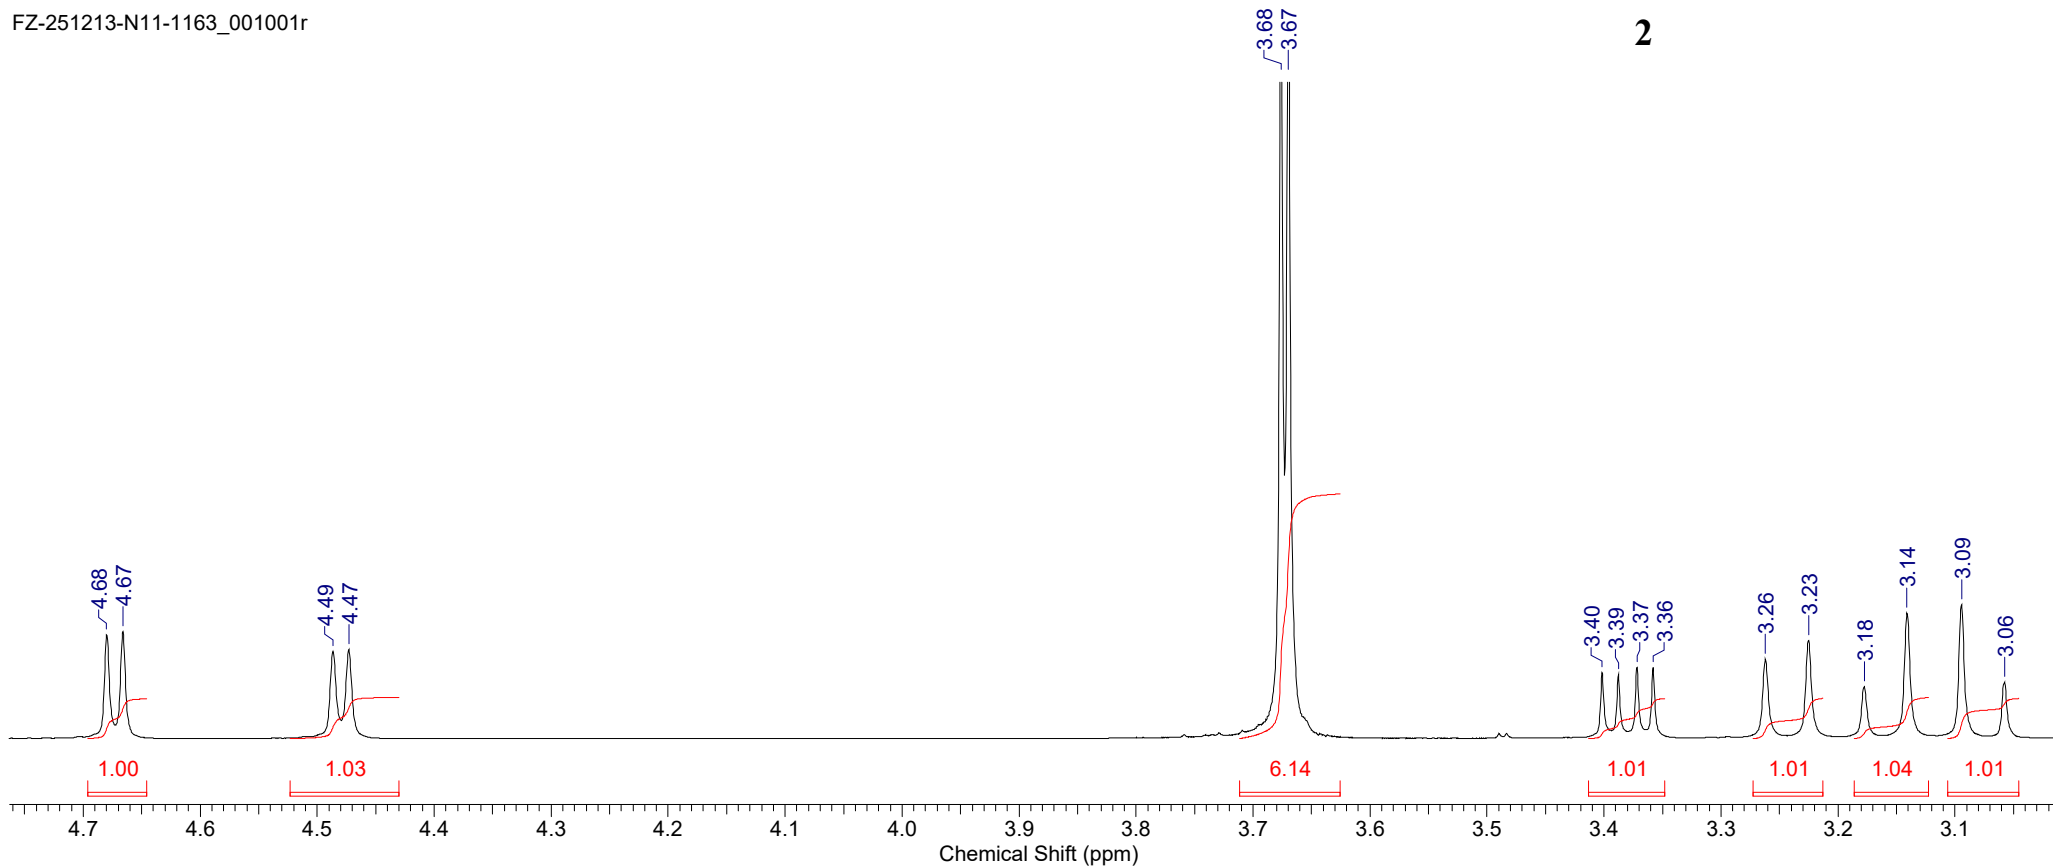

Formula C<sub>16</sub>H<sub>21</sub>NO<sub>6</sub> FW 323.3410

|                        |                      |                   |                                                                          |                        |                      |
|------------------------|----------------------|-------------------|--------------------------------------------------------------------------|------------------------|----------------------|
| Acquisition Time (sec) | 1.6056               | Comment           | 5 mm QNP 1H/15N/13C/31P Z3379/0400                                       | Date                   | 26 Dec 2013 13:05:04 |
| Date Stamp             | 26 Dec 2013 13:05:04 | File Name         | H:\DESKTOP\лот РОМЫ домино NH восстановленный\FZ-251213-N11-1163_001001r |                        |                      |
| Frequency (MHz)        | 400.13               | Nucleus           | 1H                                                                       | Number of Transients   | 16                   |
| Original Points Count  | 16384                | Owner             | root                                                                     | Points Count           | 65536                |
| Receiver Gain          | 64.00                | SW(cyclical) (Hz) | 10204.08                                                                 | Solvent                | CHLOROFORM-d         |
| Spectrum Offset (Hz)   | 2651.9934            | Sweep Width (Hz)  | 10203.93                                                                 | Temperature (degree C) | 27.000               |



FZ-251213-N11-1163\_001001r

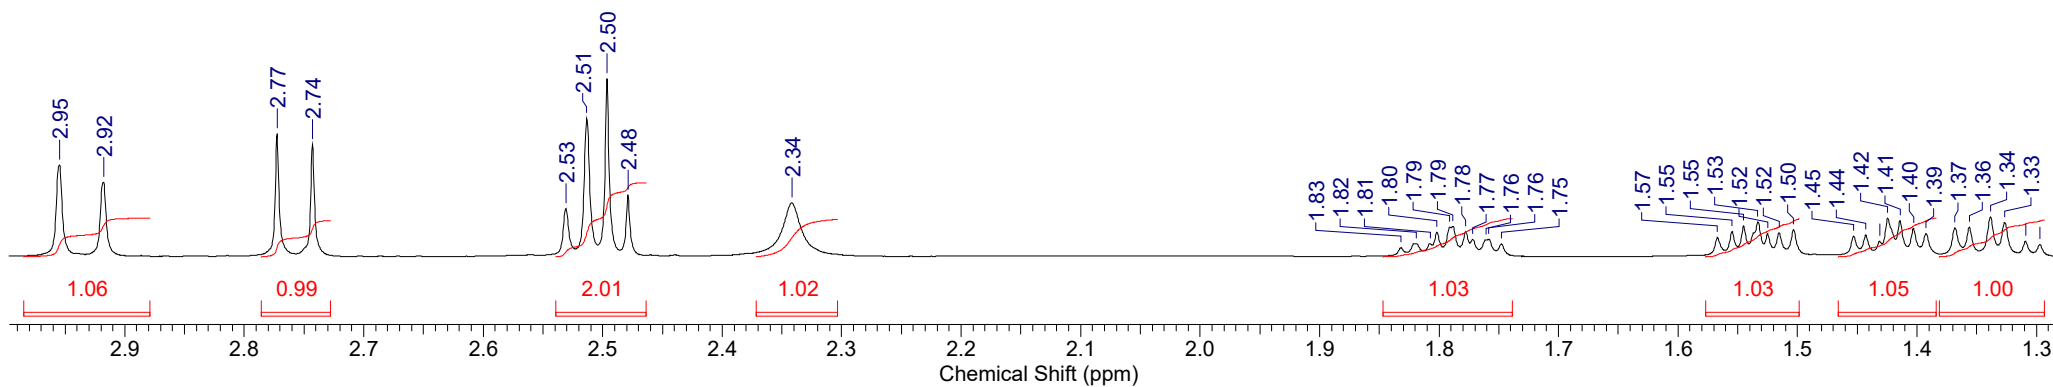



Formula C<sub>16</sub>H<sub>21</sub>NO<sub>6</sub> FW 323.3410

|                        |                      |                        |                                                                                |                      |              |                      |           |
|------------------------|----------------------|------------------------|--------------------------------------------------------------------------------|----------------------|--------------|----------------------|-----------|
| Acquisition Time (sec) | 0.5571               | Comment                | 5 mm QNP 1H/15N/13C/31P Z3379/0400                                             |                      | Date         | 26 Dec 2013 13:07:12 |           |
| Date Stamp             | 26 Dec 2013 13:07:12 | File Name              | H:\DESKTOP\от РОМЫ домино NH восстановленный\FZ-251213-N11-1163-C13DEC_001001r |                      |              |                      |           |
| Frequency (MHz)        | 100.61               | Nucleus                | 13C                                                                            | Number of Transients | 298          | Origin               | spect     |
| Original Points Count  | 16384                | Owner                  | root                                                                           | Points Count         | 65536        | Pulse Sequence       | zpgp      |
| Receiver Gain          | 32768.00             | SW(cyclical) (Hz)      | 29411.77                                                                       | Solvent              | CHLOROFORM-d | Spectrum Offset (Hz) | 9620.7012 |
| Sweep Width (Hz)       | 29411.32             | Temperature (degree C) | 27.000                                                                         |                      |              |                      |           |



FZ-251213-N11-1163-C13DEC\_001001r

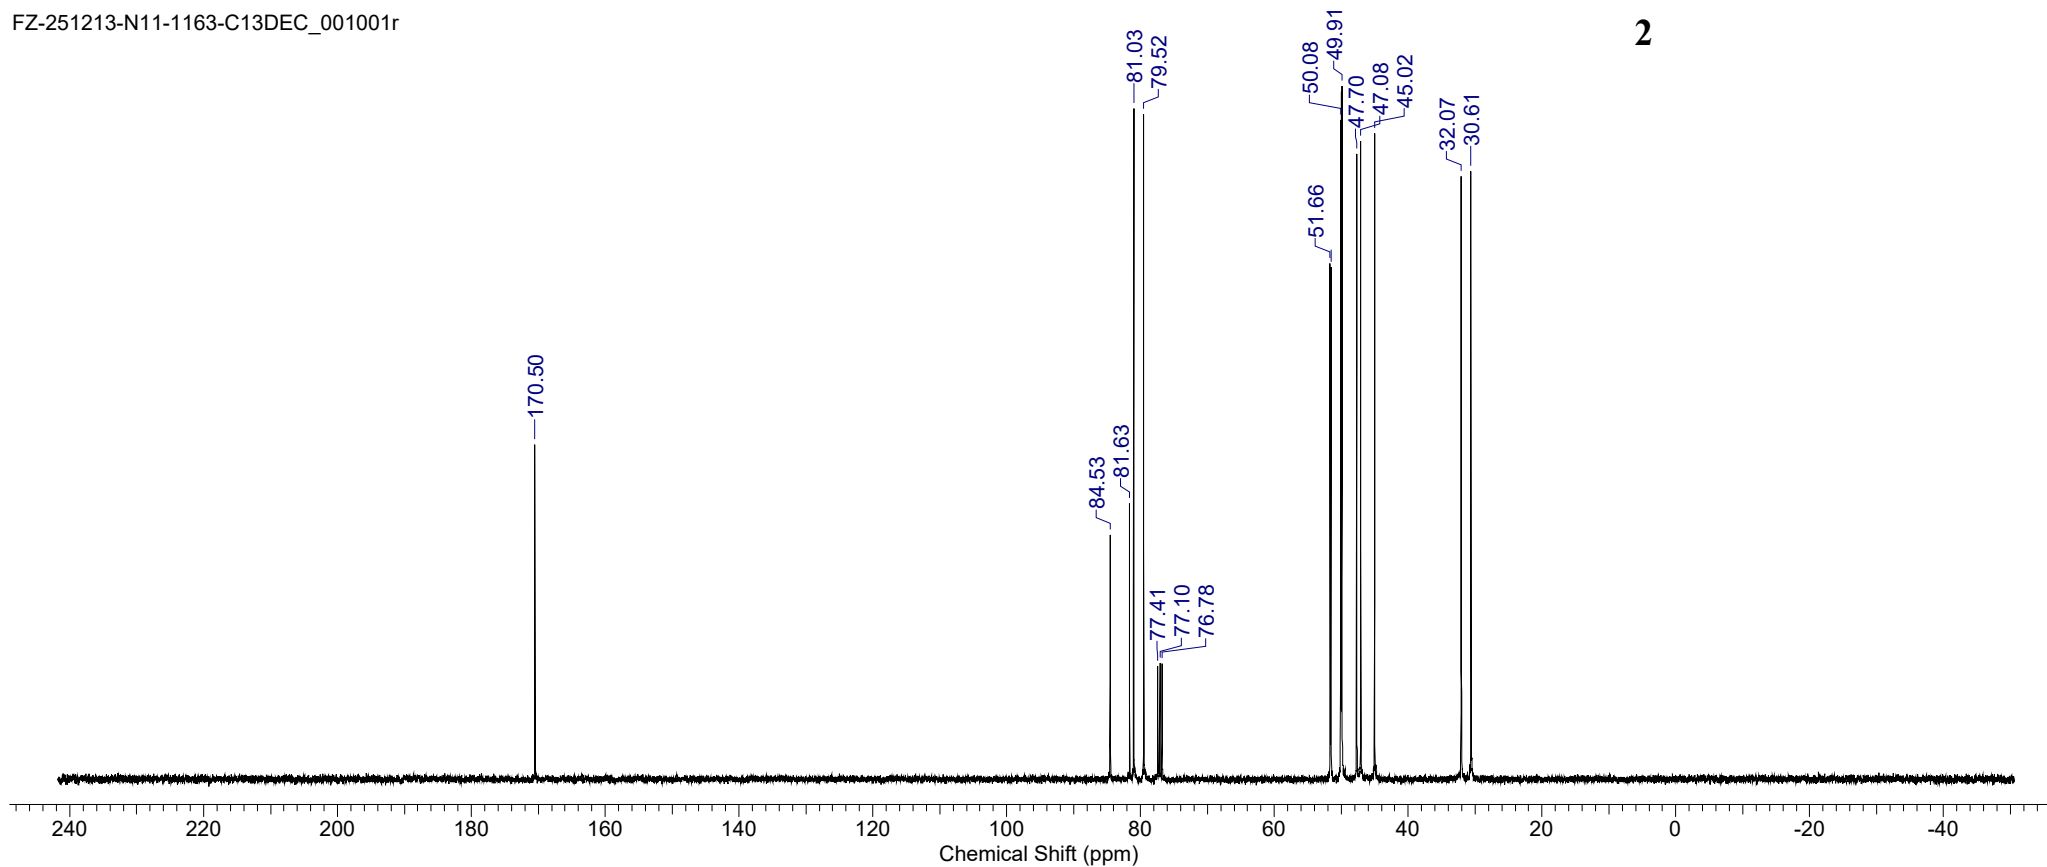

Formula C<sub>16</sub>H<sub>21</sub>NO<sub>6</sub> FW 323.3410

|                        |                      |                        |                                                                                |                      |                      |                      |           |
|------------------------|----------------------|------------------------|--------------------------------------------------------------------------------|----------------------|----------------------|----------------------|-----------|
| Acquisition Time (sec) | 0.5571               | Comment                | 5 mm QNP 1H/15N/13C/31P Z3379/0400                                             | Date                 | 26 Dec 2013 13:07:12 |                      |           |
| Date Stamp             | 26 Dec 2013 13:07:12 | File Name              | H:\DESKTOP\от РОМЫ домино NH восстановленный\FZ-251213-N11-1163-C13DEC_001001r |                      |                      |                      |           |
| Frequency (MHz)        | 100.61               | Nucleus                | 13C                                                                            | Number of Transients | 298                  | Origin               | spect     |
| Original Points Count  | 16384                | Owner                  | root                                                                           | Points Count         | 65536                | Pulse Sequence       | zpgp      |
| Receiver Gain          | 32768.00             | SW(cyclical) (Hz)      | 29411.77                                                                       | Solvent              | CHLOROFORM-d         | Spectrum Offset (Hz) | 9620.7012 |
| Sweep Width (Hz)       | 29411.32             | Temperature (degree C) | 27.000                                                                         |                      |                      |                      |           |



FZ-251213-N11-1163-C13DEC\_001001r

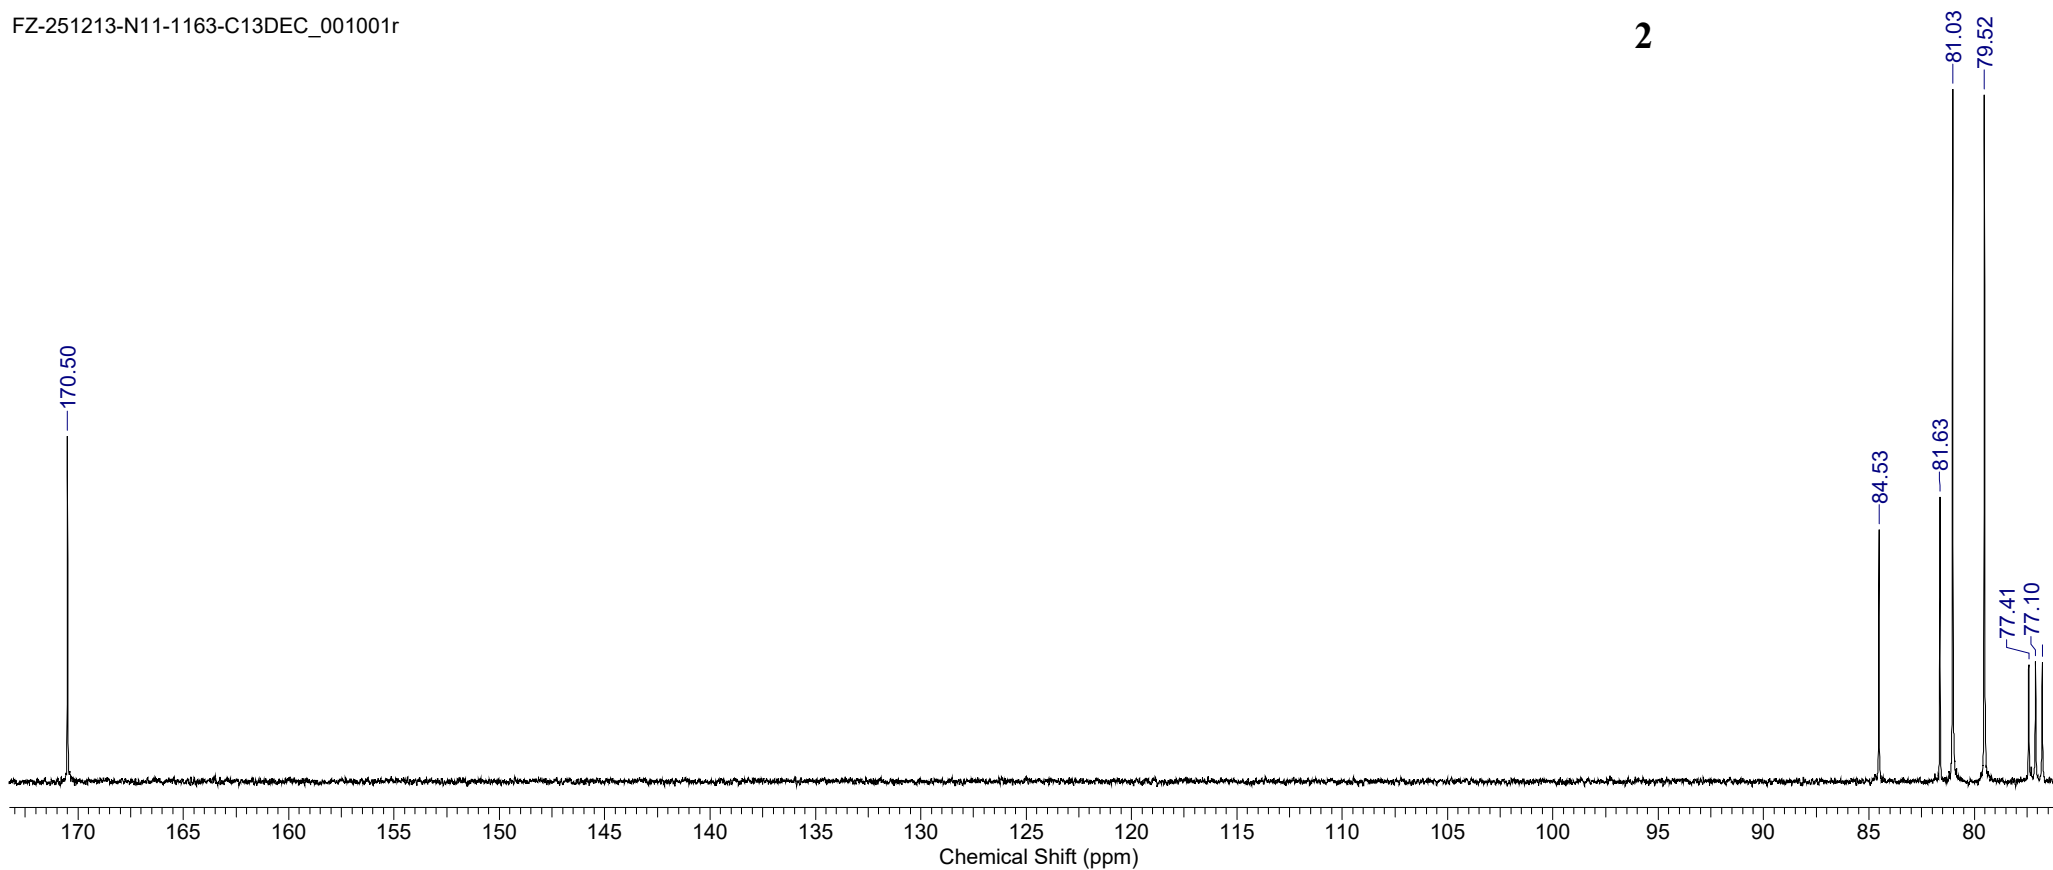

Formula C<sub>16</sub>H<sub>21</sub>N<sub>6</sub>O<sub>6</sub> FW 323.3410

|                        |                      |                        |                                                                                |                      |              |                                |
|------------------------|----------------------|------------------------|--------------------------------------------------------------------------------|----------------------|--------------|--------------------------------|
| Acquisition Time (sec) | 0.5571               | Comment                | 5 mm QNP 1H/15N/13C/31P Z3379/0400                                             |                      | Date         | 26 Dec 2013 13:07:12           |
| Date Stamp             | 26 Dec 2013 13:07:12 | File Name              | H:\DESKTOP\от РОМЫ домино NH восстановленный\FZ-251213-N11-1163-C13DEC_001001r |                      |              |                                |
| Frequency (MHz)        | 100.61               | Nucleus                | 13C                                                                            | Number of Transients | 298          | Origin spect                   |
| Original Points Count  | 16384                | Owner                  | root                                                                           | Points Count         | 65536        | Pulse Sequence zggp            |
| Receiver Gain          | 32768.00             | SW(cyclical) (Hz)      | 29411.77                                                                       | Solvent              | CHLOROFORM-d | Spectrum Offset (Hz) 9620.7012 |
| Sweep Width (Hz)       | 29411.32             | Temperature (degree C) | 27.000                                                                         |                      |              |                                |



FZ-251213-N11-1163-C13DEC\_001001r

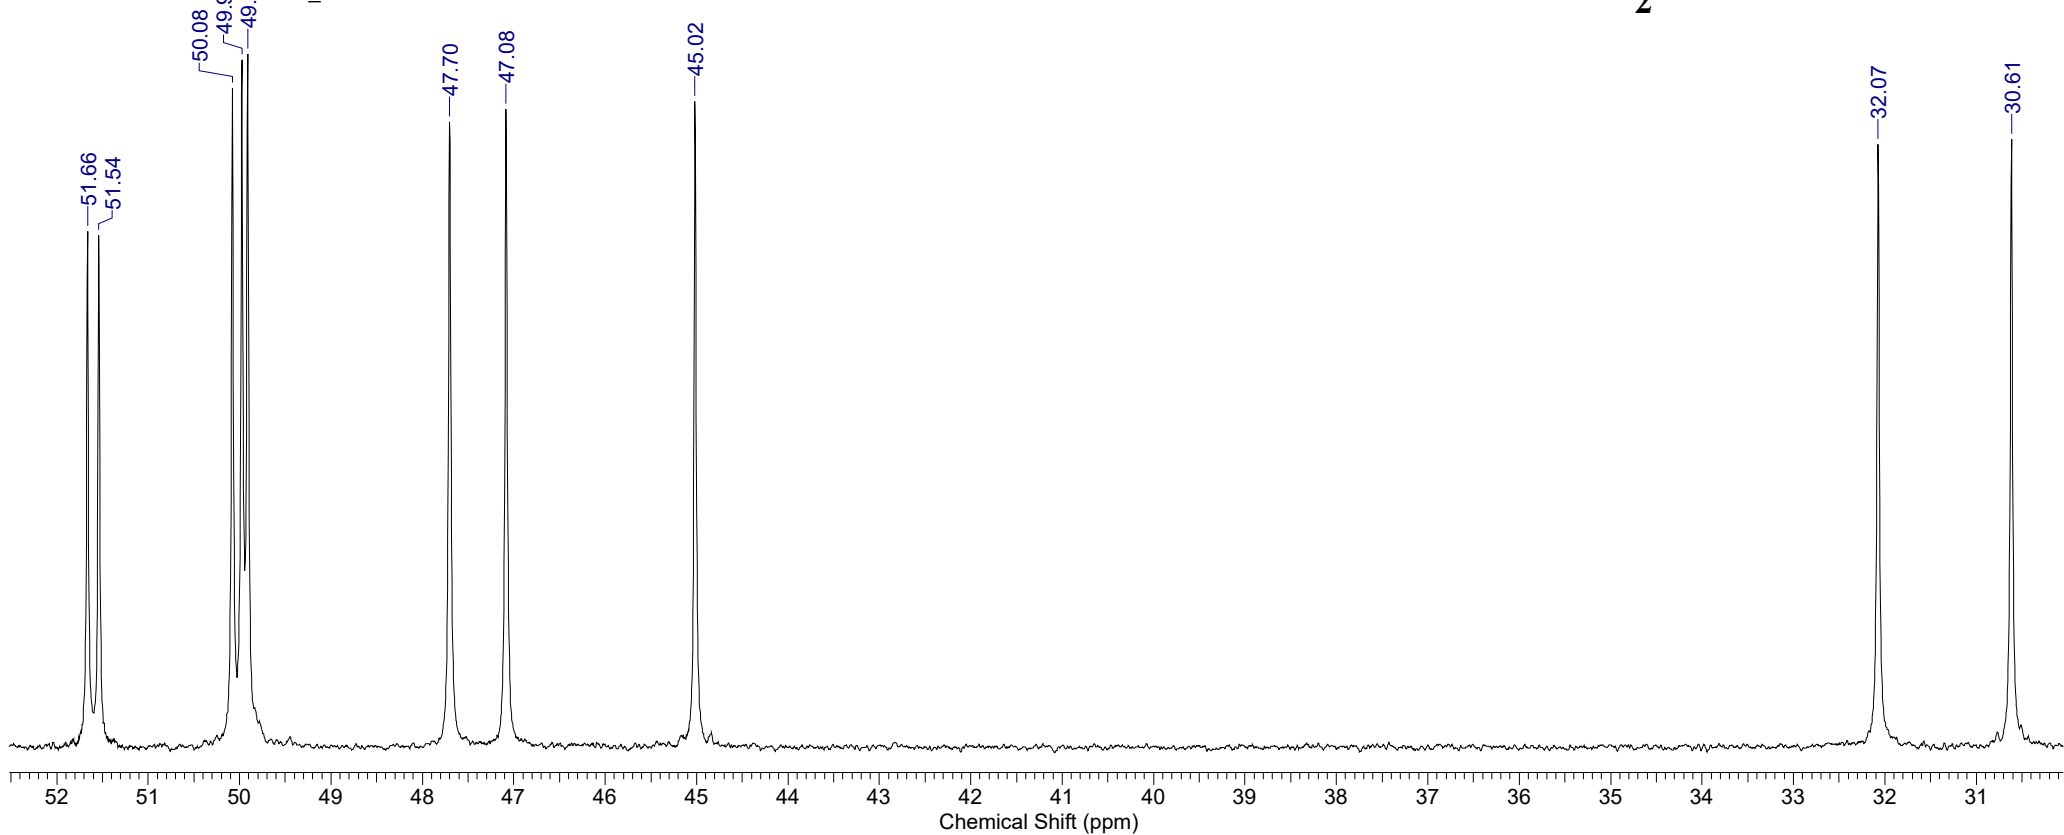

|                                                                              |                    |
|------------------------------------------------------------------------------|--------------------|
| <b>Formula</b> C <sub>20</sub> H <sub>18</sub> N <sub>2</sub> O <sub>4</sub> | <b>FW</b> 350.3679 |
|------------------------------------------------------------------------------|--------------------|

|                                                                      |                                  |                                       |                                        |
|----------------------------------------------------------------------|----------------------------------|---------------------------------------|----------------------------------------|
| <b>Acquisition Time (sec)</b> 2.0972                                 | <b>Date</b> 11 Aug 2021 09:57:20 |                                       | <b>Date Stamp</b> 11 Aug 2021 09:57:20 |
| <b>File Name</b> C:\USERS\ALEXA\DOWNLOADS\NMR11082021\FZ0179_010001r |                                  |                                       | <b>Frequency (MHz)</b> 700.17          |
| <b>Nucleus</b> 1H                                                    | <b>Number of Transients</b> 8    | <b>Origin</b> Avance                  | <b>Original Points Count</b> 32768     |
| <b>Owner</b> nmr                                                     | <b>Points Count</b> 65536        | <b>Pulse Sequence</b> zg30            | <b>Receiver Gain</b> 59.43             |
| <b>SW(cyclical) (Hz)</b> 15625.00                                    | <b>Solvent</b> DMSO-d6           | <b>Spectrum Offset (Hz)</b> 6295.9395 | <b>Sweep Width (Hz)</b> 15624.76       |
| <b>Temperature (degree C)</b> 24.988                                 |                                  |                                       |                                        |

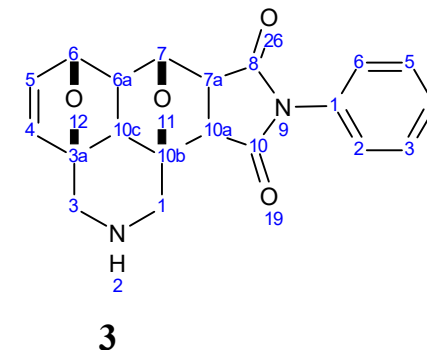

FZ0179\_010001r

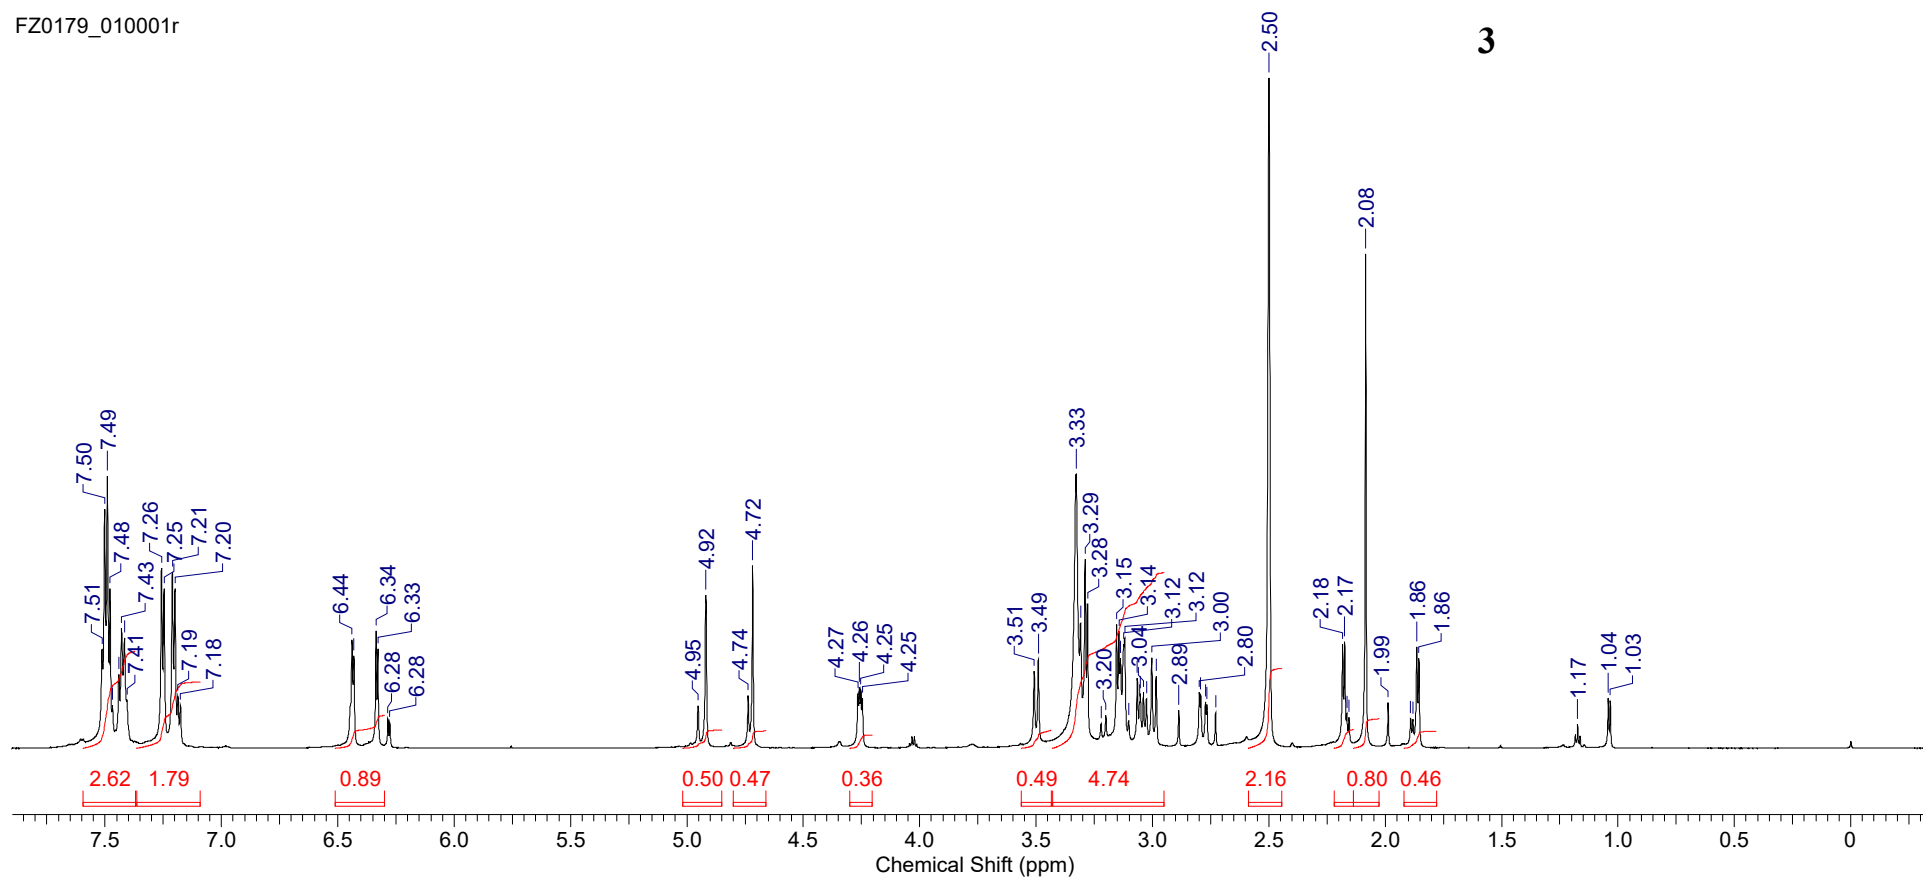

|                                                                              |                    |
|------------------------------------------------------------------------------|--------------------|
| <b>Formula</b> C <sub>20</sub> H <sub>18</sub> N <sub>2</sub> O <sub>4</sub> | <b>FW</b> 350.3679 |
|------------------------------------------------------------------------------|--------------------|

|                                                                      |                                  |                                        |
|----------------------------------------------------------------------|----------------------------------|----------------------------------------|
| <b>Acquisition Time (sec)</b> 2.0972                                 | <b>Date</b> 11 Aug 2021 09:57:20 | <b>Date Stamp</b> 11 Aug 2021 09:57:20 |
| <b>File Name</b> C:\USERS\ALEXA\DOWNLOADS\NMR11082021\FZ0179_010001r | <b>Frequency (MHz)</b> 700.17    | <b>Original Points Count</b> 32768     |
| <b>Nucleus</b> 1H                                                    | <b>Number of Transients</b> 8    | <b>Origin</b> Avance                   |
| <b>Owner</b> nmr                                                     | <b>Points Count</b> 65536        | <b>Pulse Sequence</b> zg30             |
| <b>SW(cyclical) (Hz)</b> 15625.00                                    | <b>Solvent</b> DMSO-d6           | <b>Spectrum Offset (Hz)</b> 6295.9395  |
| <b>Temperature (degree C)</b> 24.988                                 | <b>Sweep Width (Hz)</b> 15624.76 |                                        |

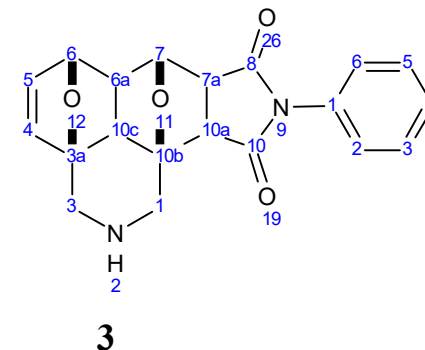

FZ0179\_010001r

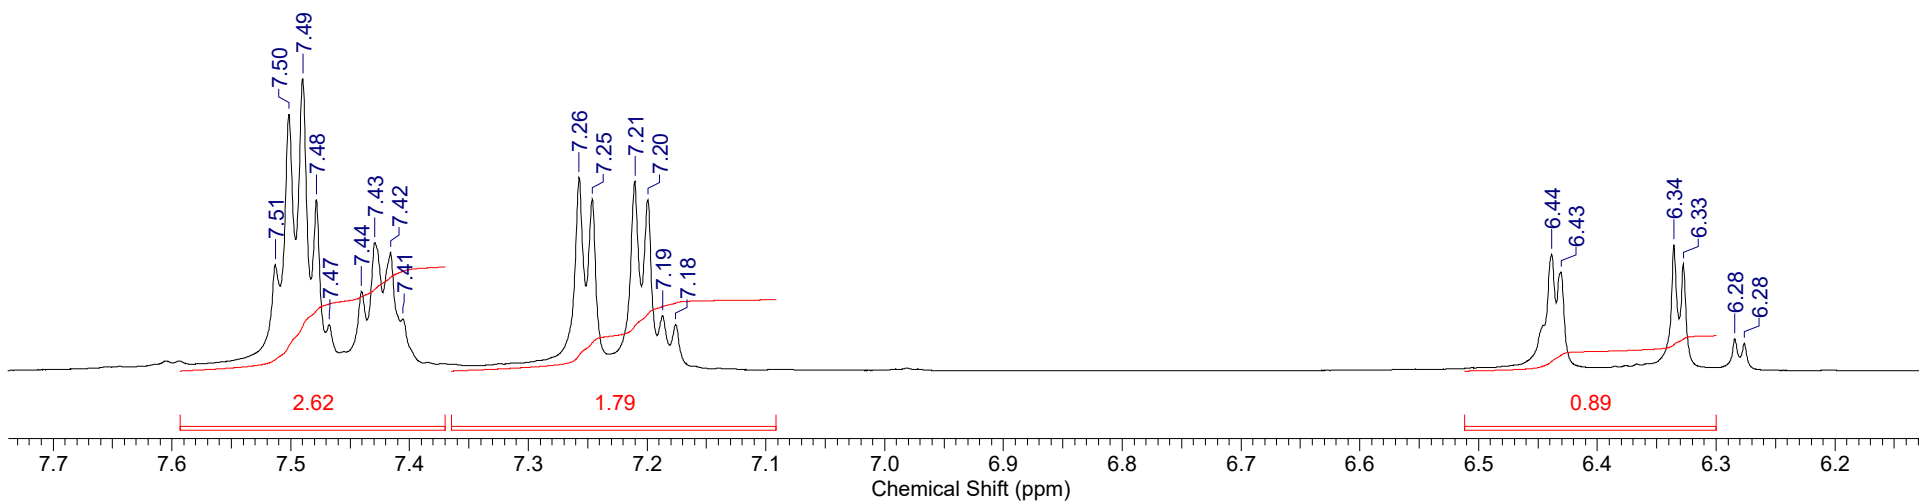

|                                                                              |                    |
|------------------------------------------------------------------------------|--------------------|
| <b>Formula</b> C <sub>20</sub> H <sub>18</sub> N <sub>2</sub> O <sub>4</sub> | <b>FW</b> 350.3679 |
|------------------------------------------------------------------------------|--------------------|

|                                                                      |                                  |                                        |
|----------------------------------------------------------------------|----------------------------------|----------------------------------------|
| <b>Acquisition Time (sec)</b> 2.0972                                 | <b>Date</b> 11 Aug 2021 09:57:20 | <b>Date Stamp</b> 11 Aug 2021 09:57:20 |
| <b>File Name</b> C:\USERS\ALEXA\DOWNLOADS\NMR11082021\FZ0179_010001r | <b>Frequency (MHz)</b> 700.17    | <b>Original Points Count</b> 32768     |
| <b>Nucleus</b> 1H                                                    | <b>Number of Transients</b> 8    | <b>Origin</b> Avance                   |
| <b>Owner</b> nmr                                                     | <b>Points Count</b> 65536        | <b>Pulse Sequence</b> zg30             |
| <b>SW(cyclical) (Hz)</b> 15625.00                                    | <b>Solvent</b> DMSO-d6           | <b>Spectrum Offset (Hz)</b> 6295.9395  |
| <b>Temperature (degree C)</b> 24.988                                 |                                  | <b>Sweep Width (Hz)</b> 15624.76       |



FZ0179\_010001r

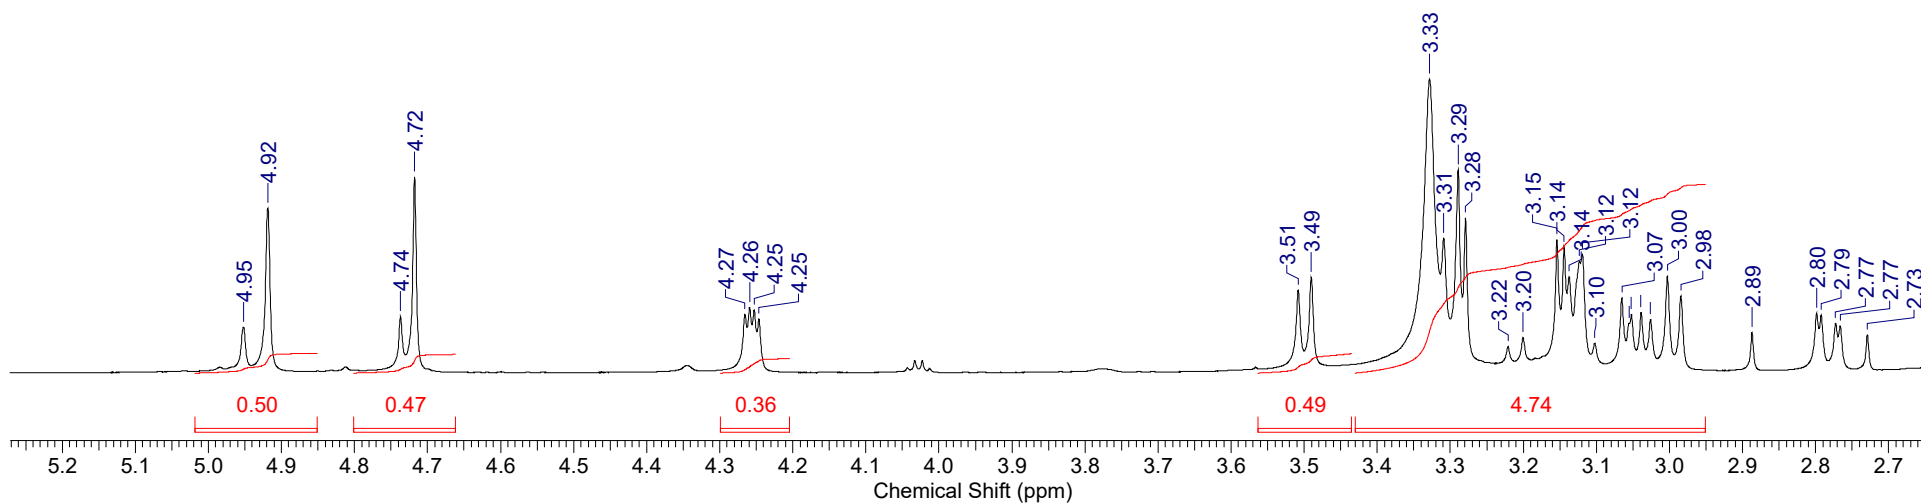

|                                                                              |                    |
|------------------------------------------------------------------------------|--------------------|
| <b>Formula</b> C <sub>20</sub> H <sub>18</sub> N <sub>2</sub> O <sub>4</sub> | <b>FW</b> 350.3679 |
|------------------------------------------------------------------------------|--------------------|

|                                                                      |                                  |                                        |
|----------------------------------------------------------------------|----------------------------------|----------------------------------------|
| <b>Acquisition Time (sec)</b> 2.0972                                 | <b>Date</b> 11 Aug 2021 09:57:20 | <b>Date Stamp</b> 11 Aug 2021 09:57:20 |
| <b>File Name</b> C:\USERS\ALEXA\DOWNLOADS\NMR11082021\FZ0179_010001r | <b>Frequency (MHz)</b> 700.17    | <b>Original Points Count</b> 32768     |
| <b>Nucleus</b> 1H                                                    | <b>Number of Transients</b> 8    | <b>Origin</b> Avance                   |
| <b>Owner</b> nmr                                                     | <b>Points Count</b> 65536        | <b>Pulse Sequence</b> zg30             |
| <b>SW(cyclical) (Hz)</b> 15625.00                                    | <b>Solvent</b> DMSO-d6           | <b>Spectrum Offset (Hz)</b> 6295.9395  |
| <b>Temperature (degree C)</b> 24.988                                 | <b>Sweep Width (Hz)</b> 15624.76 |                                        |

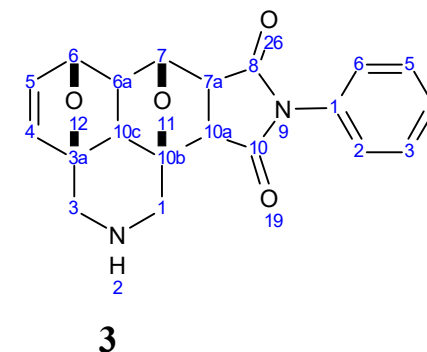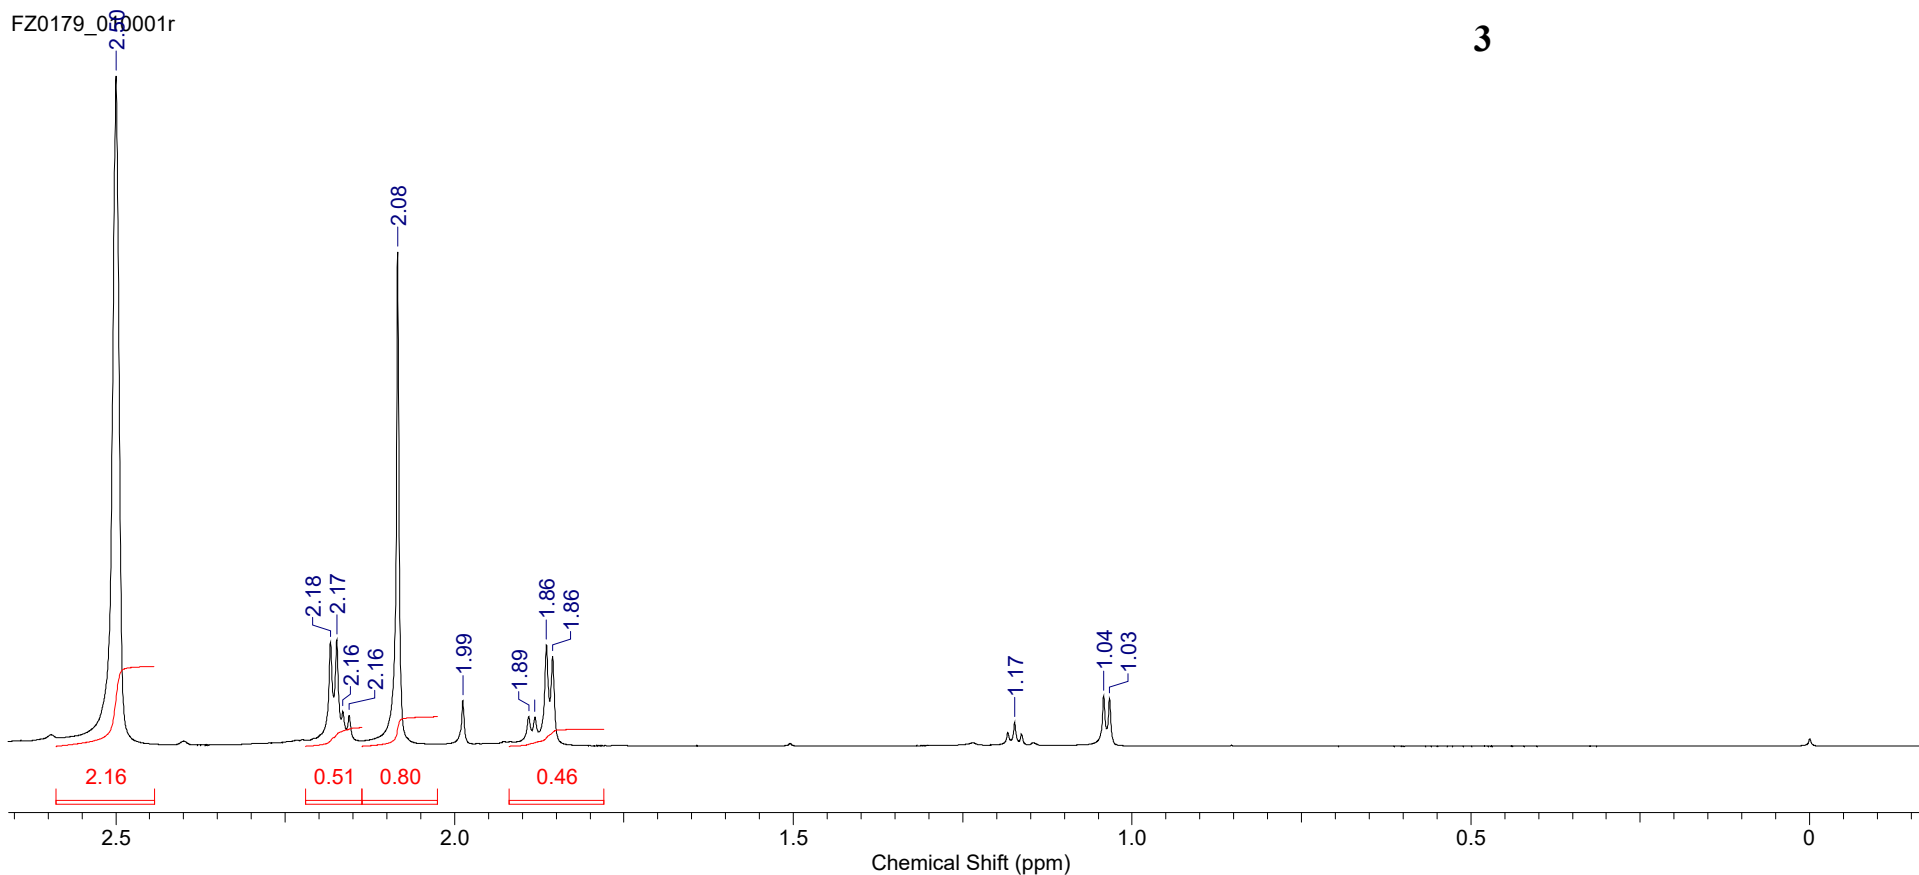

|                                                                              |                    |
|------------------------------------------------------------------------------|--------------------|
| <b>Formula</b> C <sub>20</sub> H <sub>18</sub> N <sub>2</sub> O <sub>4</sub> | <b>FW</b> 350.3679 |
|------------------------------------------------------------------------------|--------------------|

|                                                                      |                                  |                                        |                                        |
|----------------------------------------------------------------------|----------------------------------|----------------------------------------|----------------------------------------|
| <b>Acquisition Time (sec)</b> 0.7406                                 | <b>Date</b> 04 Oct 2021 13:32:48 |                                        | <b>Date Stamp</b> 04 Oct 2021 13:32:48 |
| <b>File Name</b> C:\USERS\ALEXA\DOWNLOADS\NMR04102021\FZ0343_011001r |                                  |                                        | <b>Frequency (MHz)</b> 176.06          |
| <b>Nucleus</b> 13C                                                   | <b>Number of Transients</b> 400  | <b>Origin</b> Avance                   | <b>Original Points Count</b> 32768     |
| <b>Owner</b> nmr                                                     | <b>Points Count</b> 32768        | <b>Pulse Sequence</b> zgpg30           | <b>Receiver Gain</b> 101.00            |
| <b>SW(cyclical) (Hz)</b> 44247.79                                    | <b>Solvent</b> DMSO-d6           | <b>Spectrum Offset (Hz)</b> 19366.3652 | <b>Sweep Width (Hz)</b> 44246.44       |
| <b>Temperature (degree C)</b> 25.004                                 |                                  |                                        |                                        |

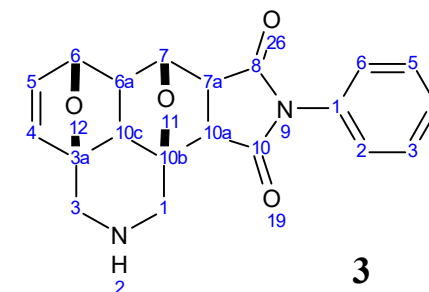

FZ0343\_011001r

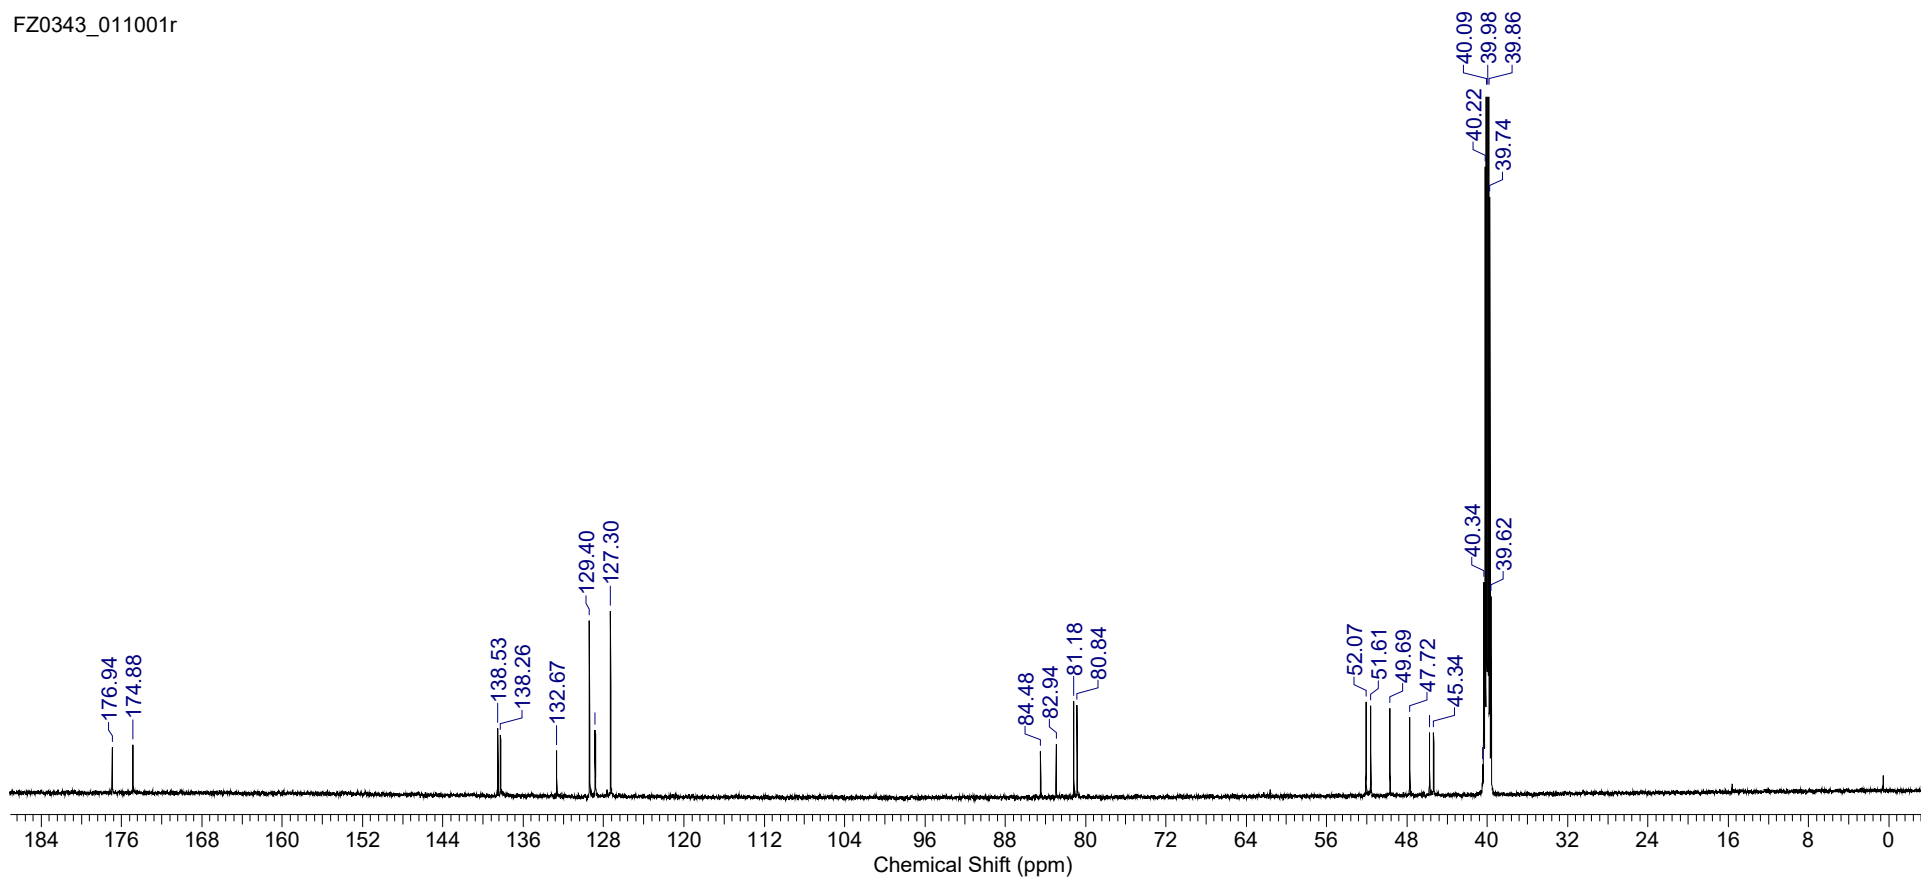



|                                                                              |                    |
|------------------------------------------------------------------------------|--------------------|
| <b>Formula</b> C <sub>20</sub> H <sub>18</sub> N <sub>2</sub> O <sub>4</sub> | <b>FW</b> 350.3679 |
|------------------------------------------------------------------------------|--------------------|

|                                                                      |                                  |                                        |                                        |
|----------------------------------------------------------------------|----------------------------------|----------------------------------------|----------------------------------------|
| <b>Acquisition Time (sec)</b> 0.7406                                 | <b>Date</b> 04 Oct 2021 13:32:48 |                                        | <b>Date Stamp</b> 04 Oct 2021 13:32:48 |
| <b>File Name</b> C:\USERS\ALEXA\DOWNLOADS\NMR04102021\FZ0343_011001r |                                  |                                        | <b>Frequency (MHz)</b> 176.06          |
| <b>Nucleus</b> 13C                                                   | <b>Number of Transients</b> 400  | <b>Origin</b> Avance                   | <b>Original Points Count</b> 32768     |
| <b>Owner</b> nmr                                                     | <b>Points Count</b> 32768        | <b>Pulse Sequence</b> zgpg30           | <b>Receiver Gain</b> 101.00            |
| <b>SW(cyclical) (Hz)</b> 44247.79                                    | <b>Solvent</b> DMSO-d6           | <b>Spectrum Offset (Hz)</b> 19366.3652 | <b>Sweep Width (Hz)</b> 44246.44       |
| <b>Temperature (degree C)</b> 25.004                                 |                                  |                                        |                                        |

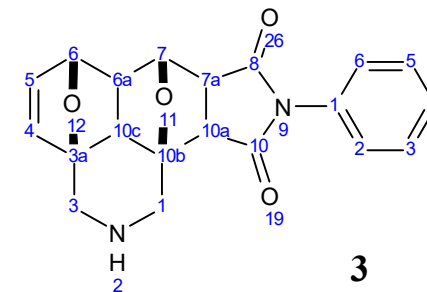

FZ0343\_011001r

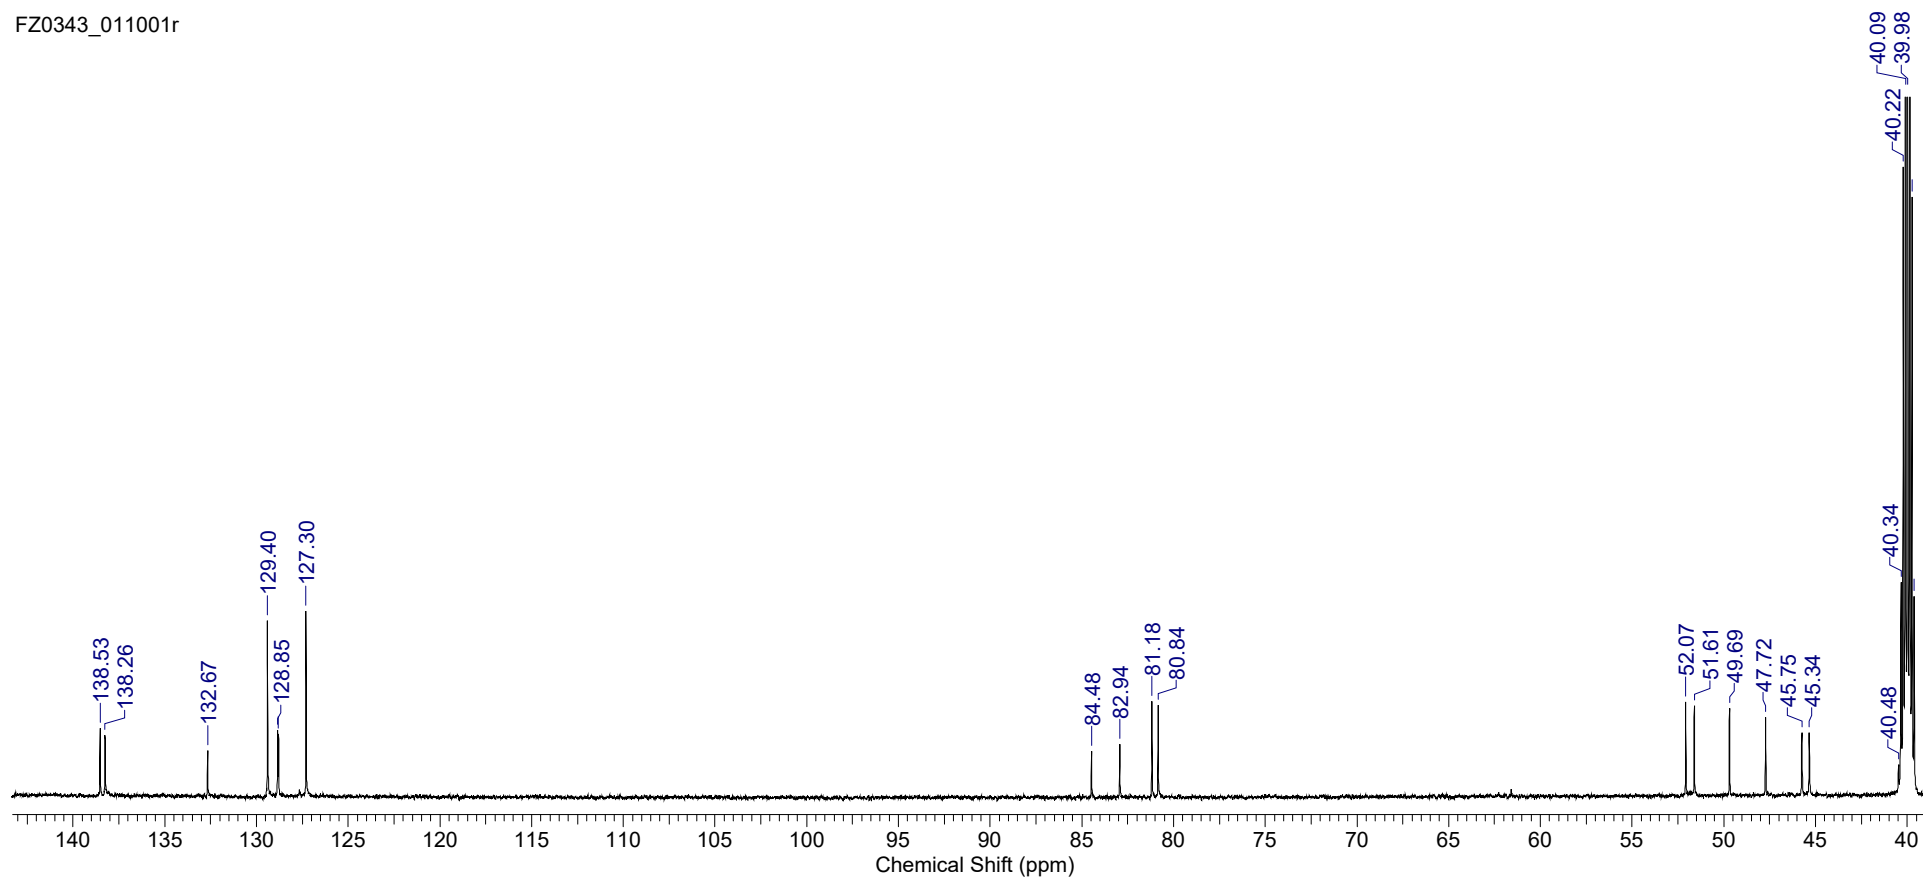

|                               |                   |                               |                      |                             |                      |
|-------------------------------|-------------------|-------------------------------|----------------------|-----------------------------|----------------------|
| <b>Acquisition Time (sec)</b> | 2.0972            | <b>Date</b>                   | 11 Mar 2022 12:52:16 | <b>Date Stamp</b>           | 11 Mar 2022 12:52:16 |
| <b>File Name</b>              | F:\FZ0725_010001r | <b>Frequency (MHz)</b>        | 700.17               | <b>Nucleus</b>              | 1H                   |
| <b>Origin</b>                 | Avance            | <b>Original Points Count</b>  | 32768                | <b>Owner</b>                | nmr                  |
| <b>Receiver Gain</b>          | 11.30             | <b>SW(cyclical) (Hz)</b>      | 15625.00             | <b>Points Count</b>         | 65536                |
| <b>Sweep Width (Hz)</b>       | 15624.76          | <b>Solvent</b>                | CHLOROFORM-d         | <b>Pulse Sequence</b>       | zg30                 |
|                               |                   | <b>Temperature (degree C)</b> | 25.006               | <b>Spectrum Offset (Hz)</b> | 6261.3374            |

FZ0725\_010001r

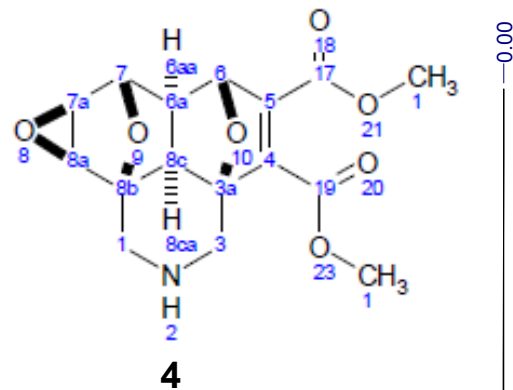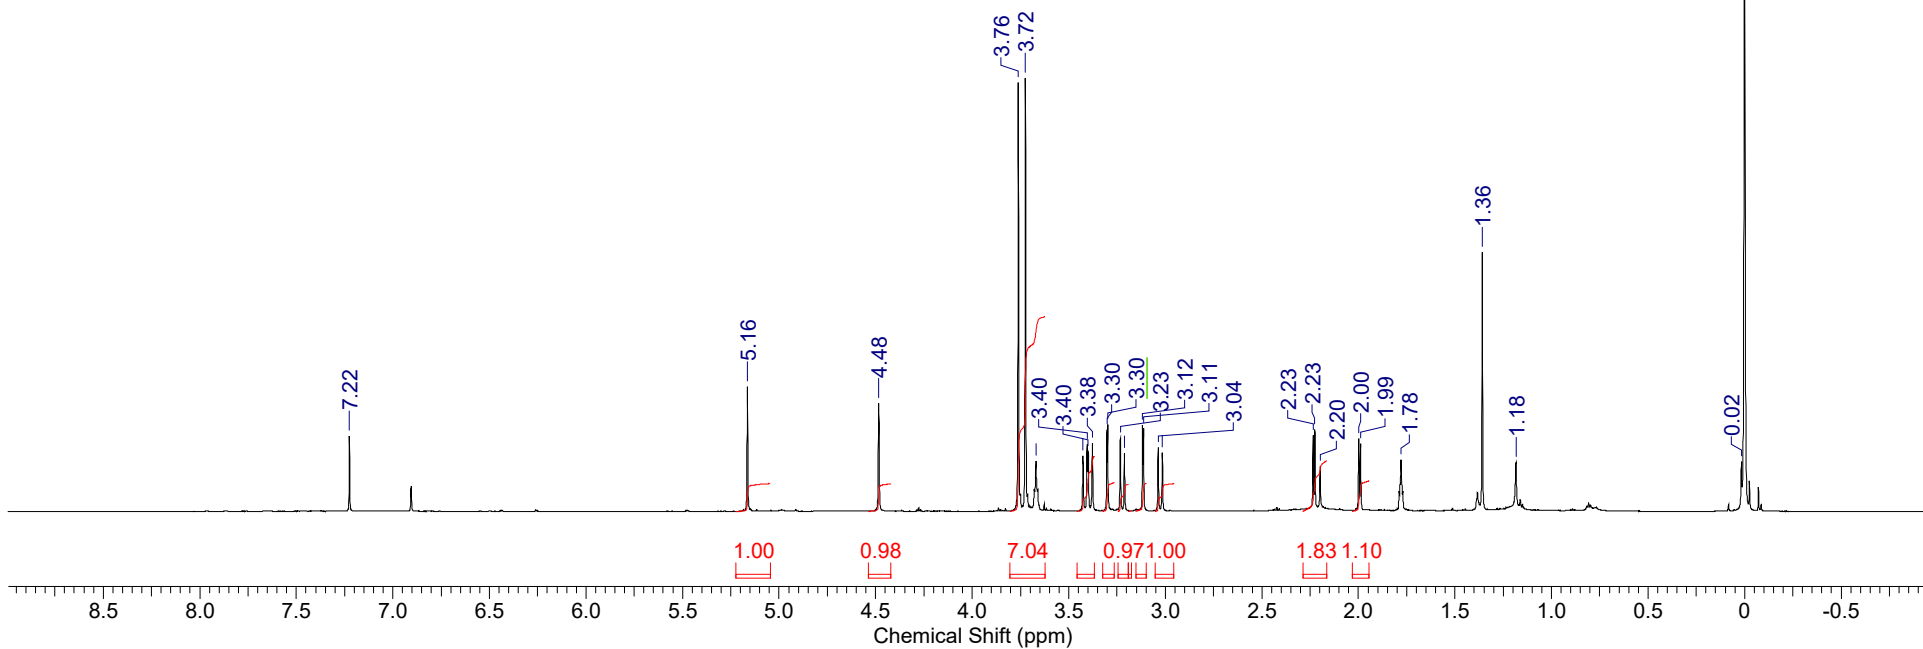

|                                                                |                    |
|----------------------------------------------------------------|--------------------|
| <b>Formula</b> C <sub>16</sub> H <sub>17</sub> NO <sub>7</sub> | <b>FW</b> 335.3087 |
|----------------------------------------------------------------|--------------------|

|                                                       |                                       |                                        |
|-------------------------------------------------------|---------------------------------------|----------------------------------------|
| <b>Acquisition Time (sec)</b> 2.0972                  | <b>Date</b> 11 Aug 2021 09:53:04      | <b>Date Stamp</b> 11 Aug 2021 09:53:04 |
| <b>File Name</b> C:\USERS\LIZA\DESKTOP\FZ0178_010001r | <b>Frequency (MHz)</b> 700.17         | <b>Nucleus</b> 1H                      |
| <b>Number of Transients</b> 8                         | <b>Origin</b> Avance                  | <b>Original Points Count</b> 32768     |
| <b>Points Count</b> 65536                             | <b>Pulse Sequence</b> zg30            | <b>Receiver Gain</b> 78.83             |
| <b>Solvent</b> DMSO-d6                                | <b>Spectrum Offset (Hz)</b> 6297.7075 | <b>SW(cyclical) (Hz)</b> 15625.00      |
|                                                       | <b>Sweep Width (Hz)</b> 15624.76      | <b>Temperature (degree C)</b> 24.989   |

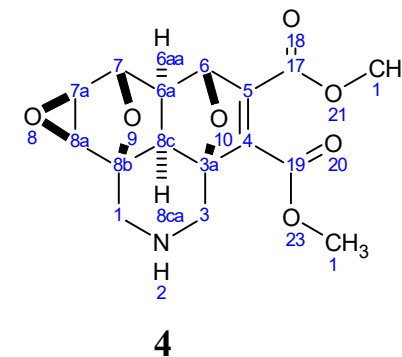

FZ0178\_010001R.ESP

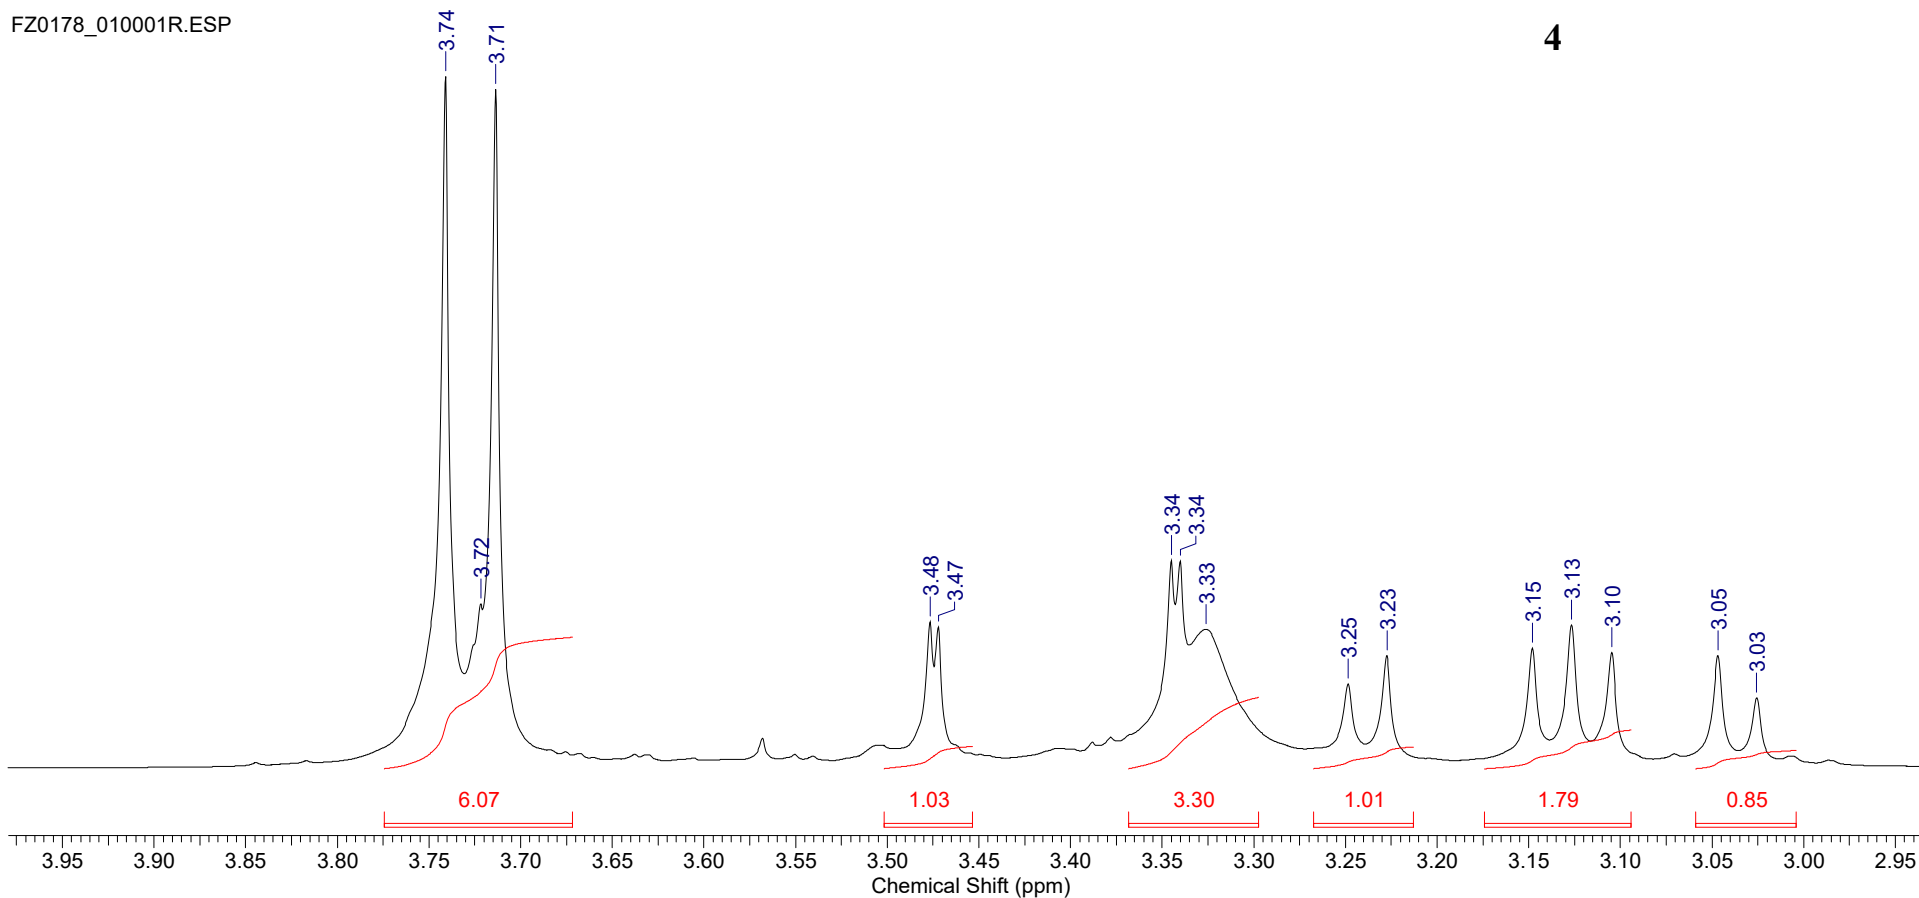

|                                                                |                    |
|----------------------------------------------------------------|--------------------|
| <b>Formula</b> C <sub>16</sub> H <sub>17</sub> NO <sub>7</sub> | <b>FW</b> 335.3087 |
|----------------------------------------------------------------|--------------------|

|                                                       |                                       |                                        |
|-------------------------------------------------------|---------------------------------------|----------------------------------------|
| <b>Acquisition Time (sec)</b> 2.0972                  | <b>Date</b> 11 Aug 2021 09:53:04      | <b>Date Stamp</b> 11 Aug 2021 09:53:04 |
| <b>File Name</b> C:\USERS\LIZA\DESKTOP\FZ0178_010001r | <b>Frequency (MHz)</b> 700.17         | <b>Nucleus</b> 1H                      |
| <b>Number of Transients</b> 8                         | <b>Origin</b> Avance                  | <b>Original Points Count</b> 32768     |
| <b>Points Count</b> 65536                             | <b>Pulse Sequence</b> zg30            | <b>Receiver Gain</b> 78.83             |
| <b>Solvent</b> DMSO-d6                                | <b>Spectrum Offset (Hz)</b> 6297.7075 | <b>SW(cyclical) (Hz)</b> 15624.76      |
|                                                       | <b>Sweep Width (Hz)</b> 15624.76      | <b>Temperature (degree C)</b> 24.989   |

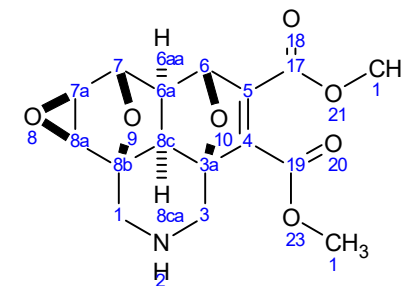

4

FZ0178\_010001R.ESP

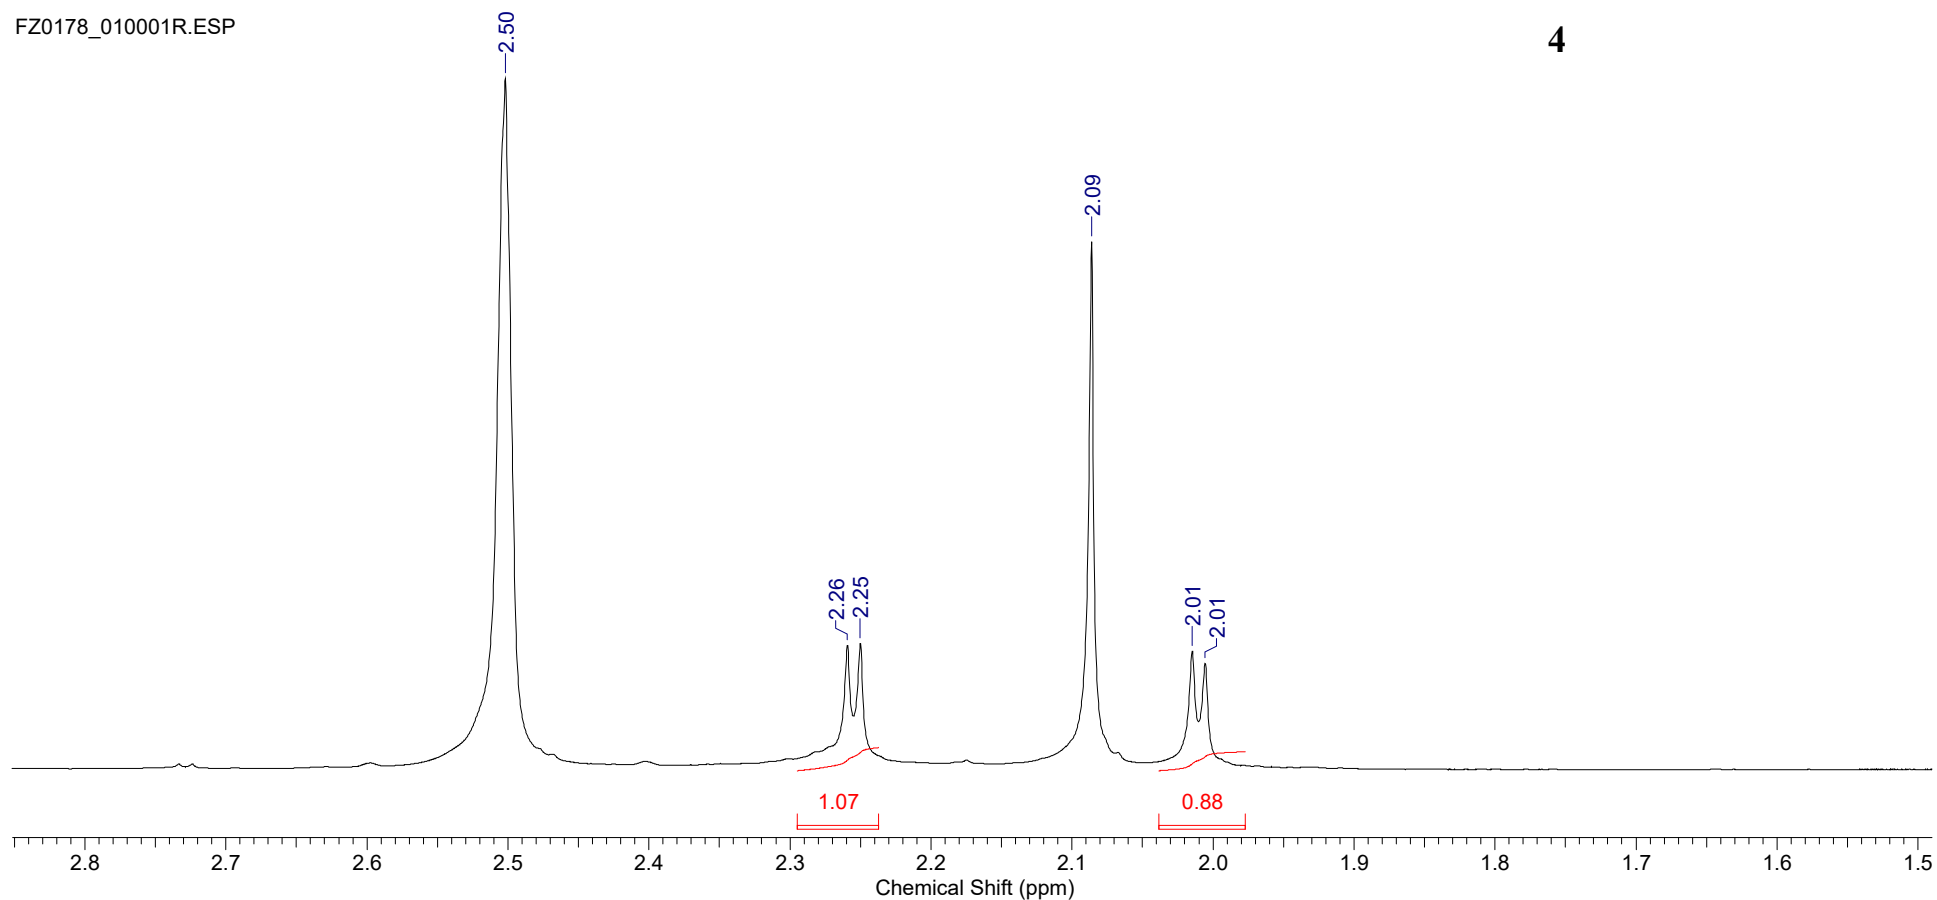

|                                                                |                    |
|----------------------------------------------------------------|--------------------|
| <b>Formula</b> C <sub>16</sub> H <sub>17</sub> NO <sub>7</sub> | <b>FW</b> 335.3087 |
|----------------------------------------------------------------|--------------------|

|                                                                      |                                  |                                        |                                        |
|----------------------------------------------------------------------|----------------------------------|----------------------------------------|----------------------------------------|
| <b>Acquisition Time (sec)</b> 0.7406                                 | <b>Date</b> 04 Oct 2021 13:17:52 |                                        | <b>Date Stamp</b> 04 Oct 2021 13:17:52 |
| <b>File Name</b> C:\USERS\ALEXA\DOWNLOADS\NMR04102021\FZ0344_011001r |                                  |                                        | <b>Frequency (MHz)</b> 176.06          |
| <b>Nucleus</b> 13C                                                   | <b>Number of Transients</b> 400  | <b>Origin</b> Avance                   | <b>Original Points Count</b> 32768     |
| <b>Owner</b> nmr                                                     | <b>Points Count</b> 32768        | <b>Pulse Sequence</b> zgpg30           | <b>Receiver Gain</b> 101.00            |
| <b>SW(cyclical) (Hz)</b> 44247.79                                    | <b>Solvent</b> DMSO-d6           | <b>Spectrum Offset (Hz)</b> 19366.3652 | <b>Sweep Width (Hz)</b> 44246.44       |
| <b>Temperature (degree C)</b> 25.005                                 |                                  |                                        |                                        |

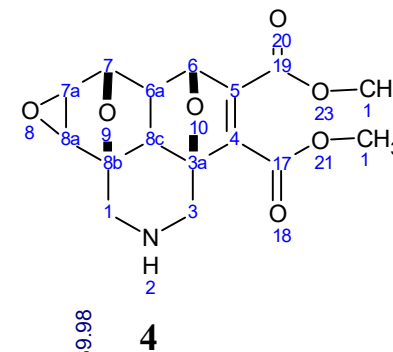

FZ0344\_011001r

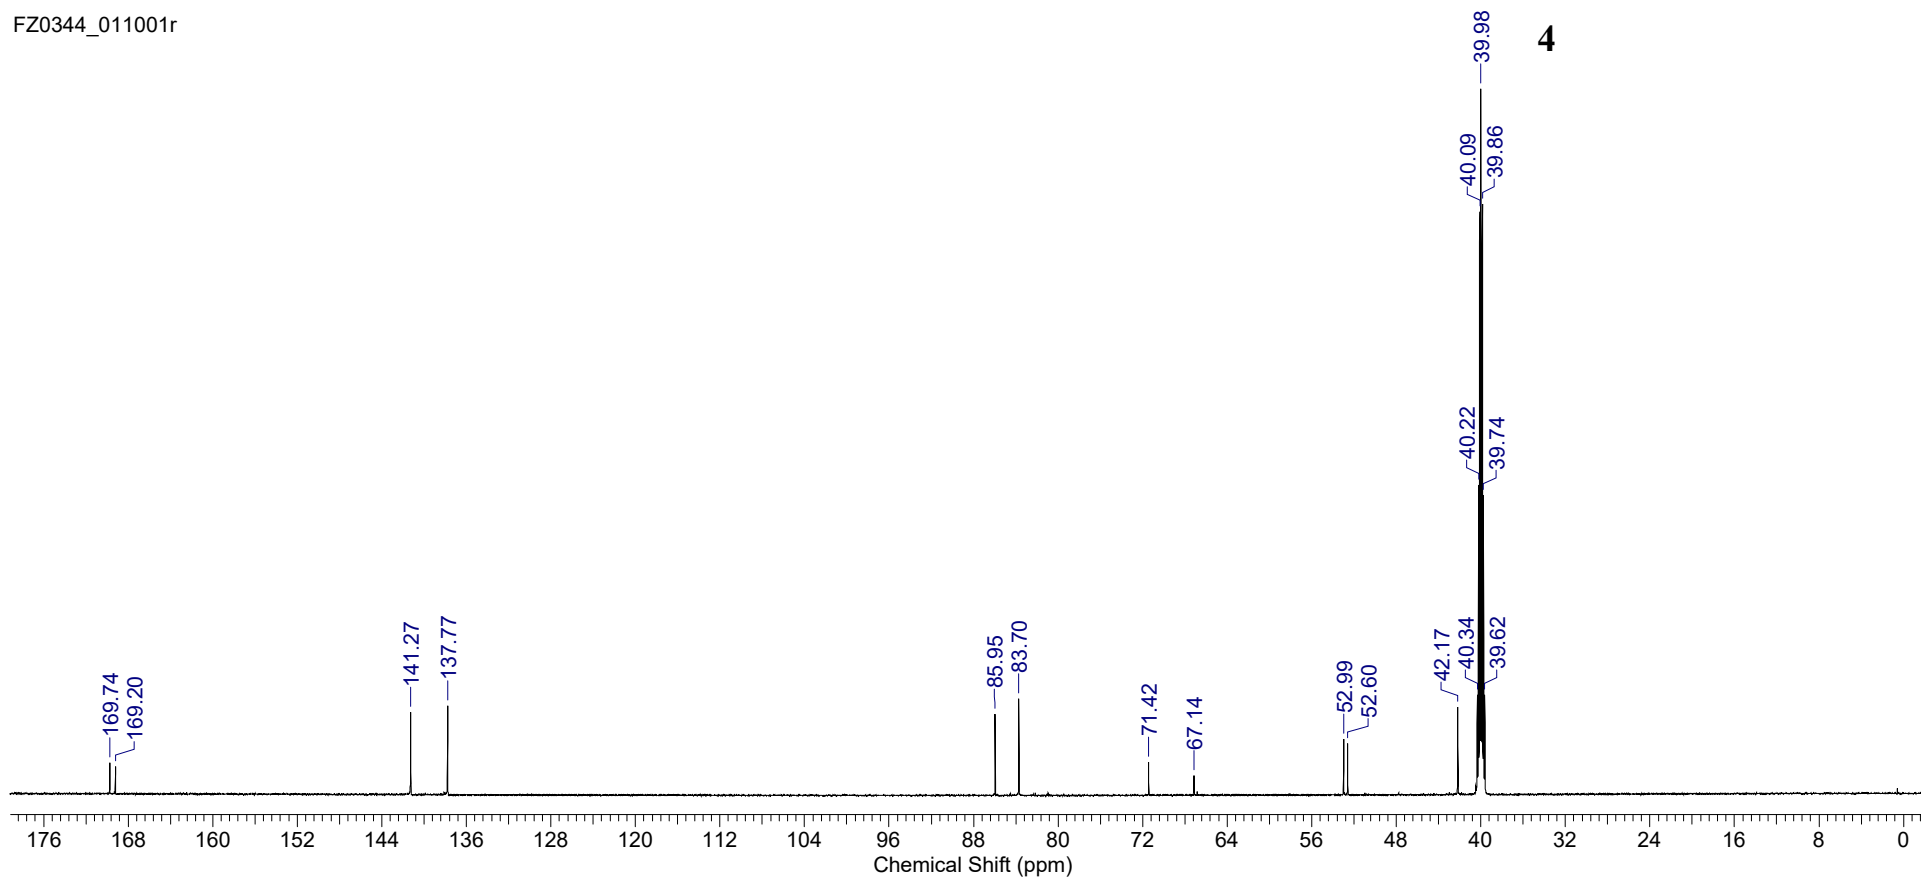

|         |                                                 |    |          |
|---------|-------------------------------------------------|----|----------|
| Formula | C <sub>16</sub> H <sub>17</sub> NO <sub>6</sub> | FW | 319.3093 |
|---------|-------------------------------------------------|----|----------|

|                        |                      |                   |                                                                       |                        |                      |
|------------------------|----------------------|-------------------|-----------------------------------------------------------------------|------------------------|----------------------|
| Acquisition Time (sec) | 1.6056               | Comment           | 5 mm QNP 1H/15N/13C/31P Z3379/0400                                    | Date                   | 22 Oct 2014 14:56:00 |
| Date Stamp             | 22 Oct 2014 14:56:00 | File Name         | C:\Users\Fedor\Desktop\17.10.14\FZ3886-FZ1185\FZ3886-FZ1185_001000fid |                        |                      |
| Frequency (MHz)        | 400.14               | Nucleus           | 1H                                                                    | Number of Transients   | 6                    |
| Original Points Count  | 16384                | Owner             | root                                                                  | Points Count           | 16384                |
| Receiver Gain          | 128.00               | SW(cyclical) (Hz) | 10204.08                                                              | Solvent                | CHLOROFORM-d         |
| Spectrum Offset (Hz)   | 2629.7024            | Sweep Width (Hz)  | 10203.46                                                              | Temperature (degree C) | 27.000               |

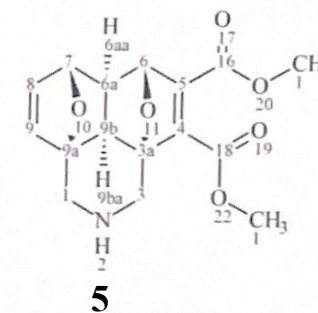

FZ3886-FZ1185\_001000fid

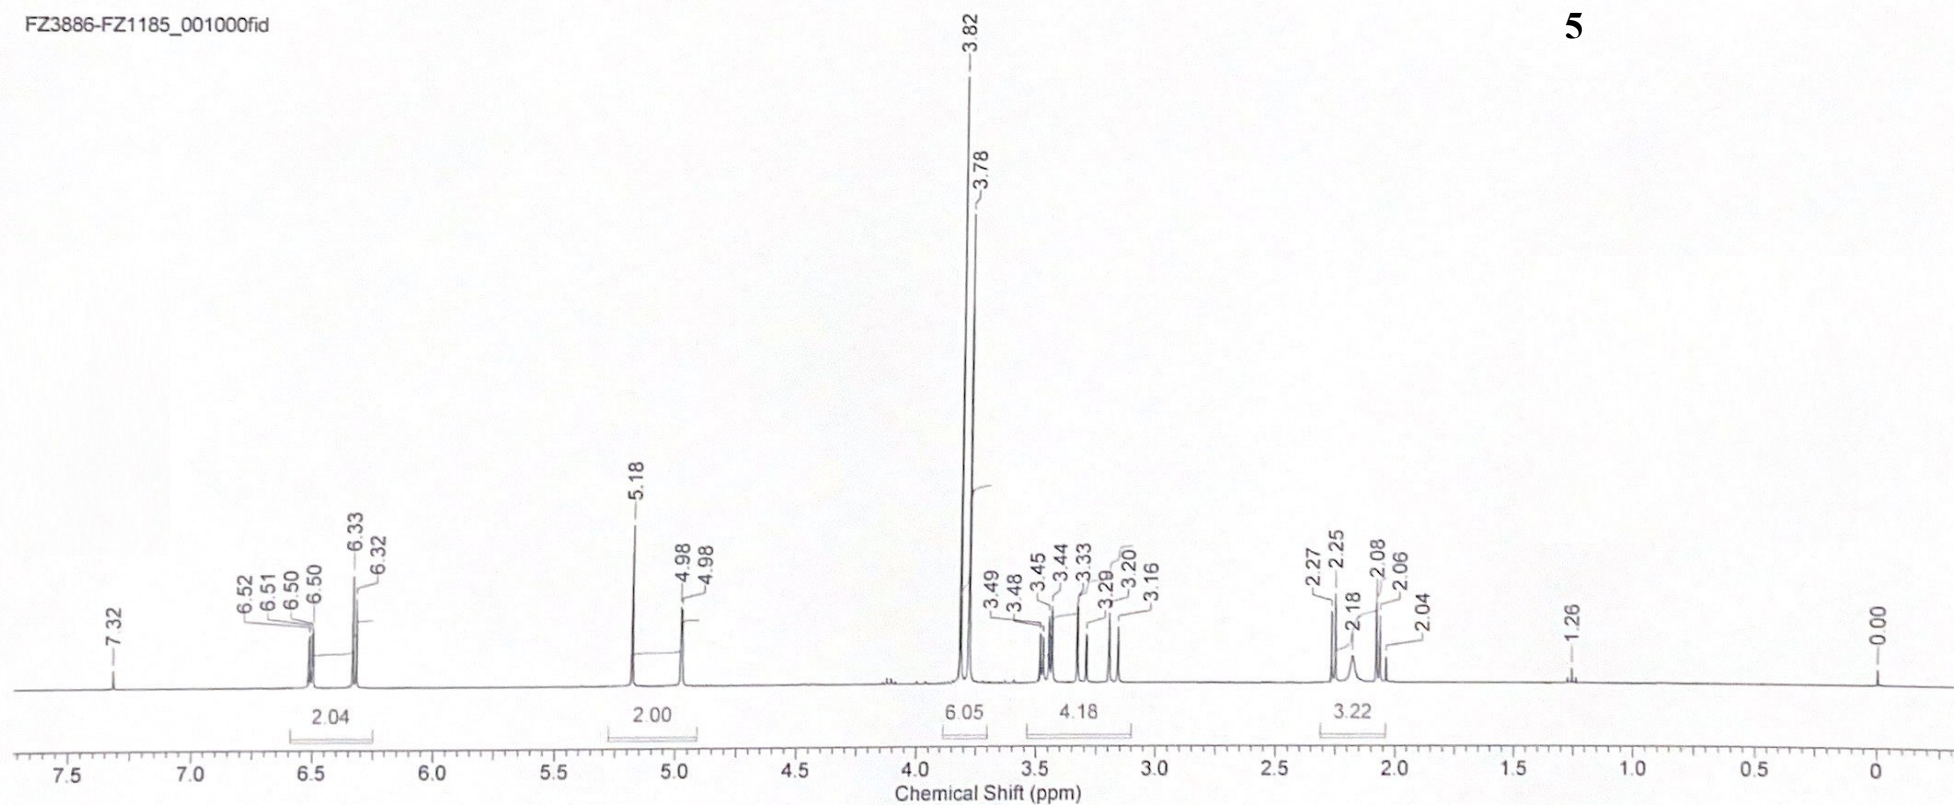



|         |                                                 |    |          |
|---------|-------------------------------------------------|----|----------|
| Formula | C <sub>16</sub> H <sub>17</sub> NO <sub>6</sub> | FW | 319.3093 |
|---------|-------------------------------------------------|----|----------|

|                        |                      |                   |                                                                       |                        |                      |
|------------------------|----------------------|-------------------|-----------------------------------------------------------------------|------------------------|----------------------|
| Acquisition Time (sec) | 1.6056               | Comment           | 5 mm QNP 1H/15N/13C/31P Z3379/0400                                    | Date                   | 22 Oct 2014 14:56:00 |
| Date Stamp             | 22 Oct 2014 14:56:00 | File Name         | C:\Users\Fedor\Desktop\17.10.14\FZ3886-FZ1185\FZ3886-FZ1185_001000fid |                        |                      |
| Frequency (MHz)        | 400.14               | Nucleus           | 1H                                                                    | Number of Transients   | 6                    |
| Original Points Count  | 16384                | Owner             | root                                                                  | Points Count           | 16384                |
| Receiver Gain          | 128.00               | SW(cyclical) (Hz) | 10204.08                                                              | Solvent                | CHLOROFORM-d         |
| Spectrum Offset (Hz)   | 2629.7024            | Sweep Width (Hz)  | 10203.46                                                              | Temperature (degree C) | 27.000               |

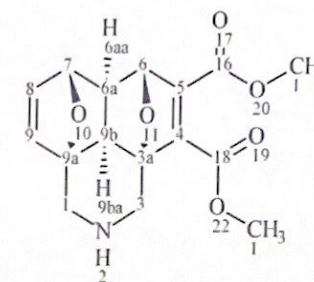**5**

FZ3886-FZ1185\_001000fid

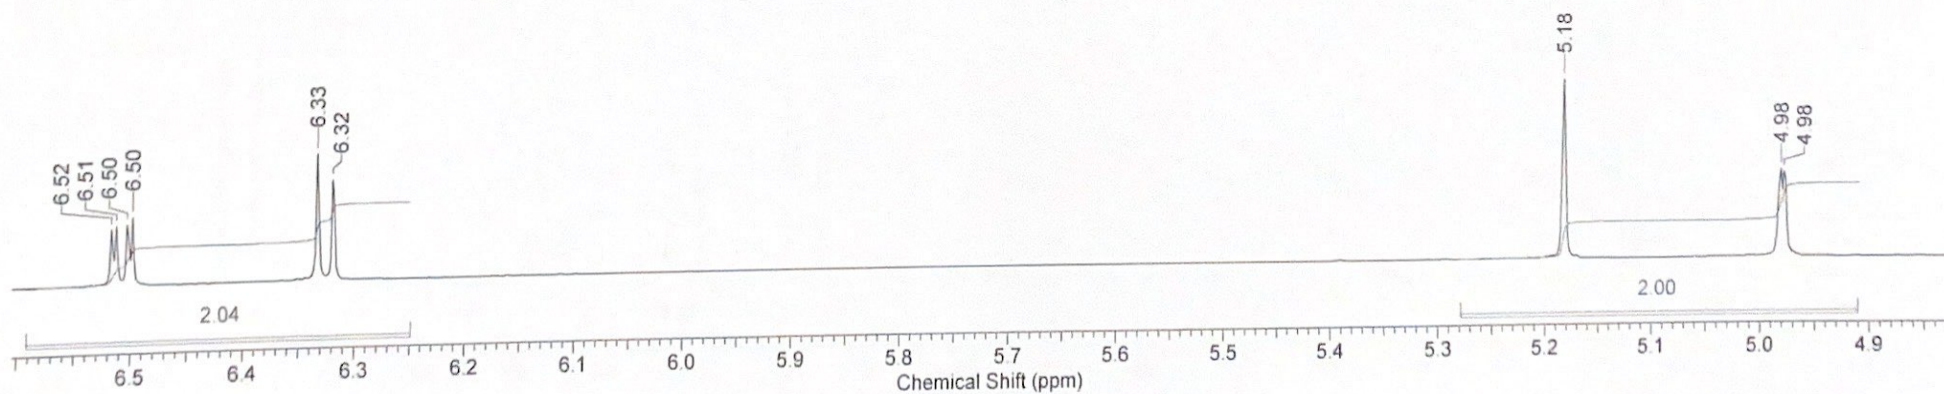



Formula C<sub>16</sub>H<sub>17</sub>NO<sub>6</sub> FW 319.3093

|                        |                      |                   |                                                                       |                        |                      |
|------------------------|----------------------|-------------------|-----------------------------------------------------------------------|------------------------|----------------------|
| Acquisition Time (sec) | 1.6056               | Comment           | 5 mm QNP 1H/15N/13C/31P Z3379/0400                                    | Date                   | 22 Oct 2014 14:56:00 |
| Date Stamp             | 22 Oct 2014 14:56:00 | File Name         | C:\Users\Fedor\Desktop\17.10.14\FZ3886-FZ1185\FZ3886-FZ1185_001000fid |                        |                      |
| Frequency (MHz)        | 400.14               | Nucleus           | 1H                                                                    | Number of Transients   | 6                    |
| Original Points Count  | 16384                | Owner             | root                                                                  | Points Count           | 16384                |
| Receiver Gain          | 128.00               | SW(cyclical) (Hz) | 10204.08                                                              | Solvent                | CHLOROFORM-d         |
| Spectrum Offset (Hz)   | 2629.7024            | Sweep Width (Hz)  | 10203.46                                                              | Temperature (degree C) | 27.000               |

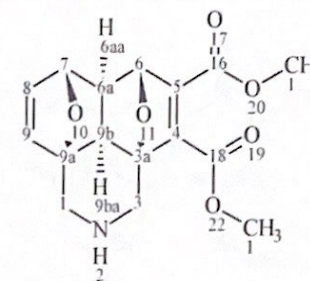

5

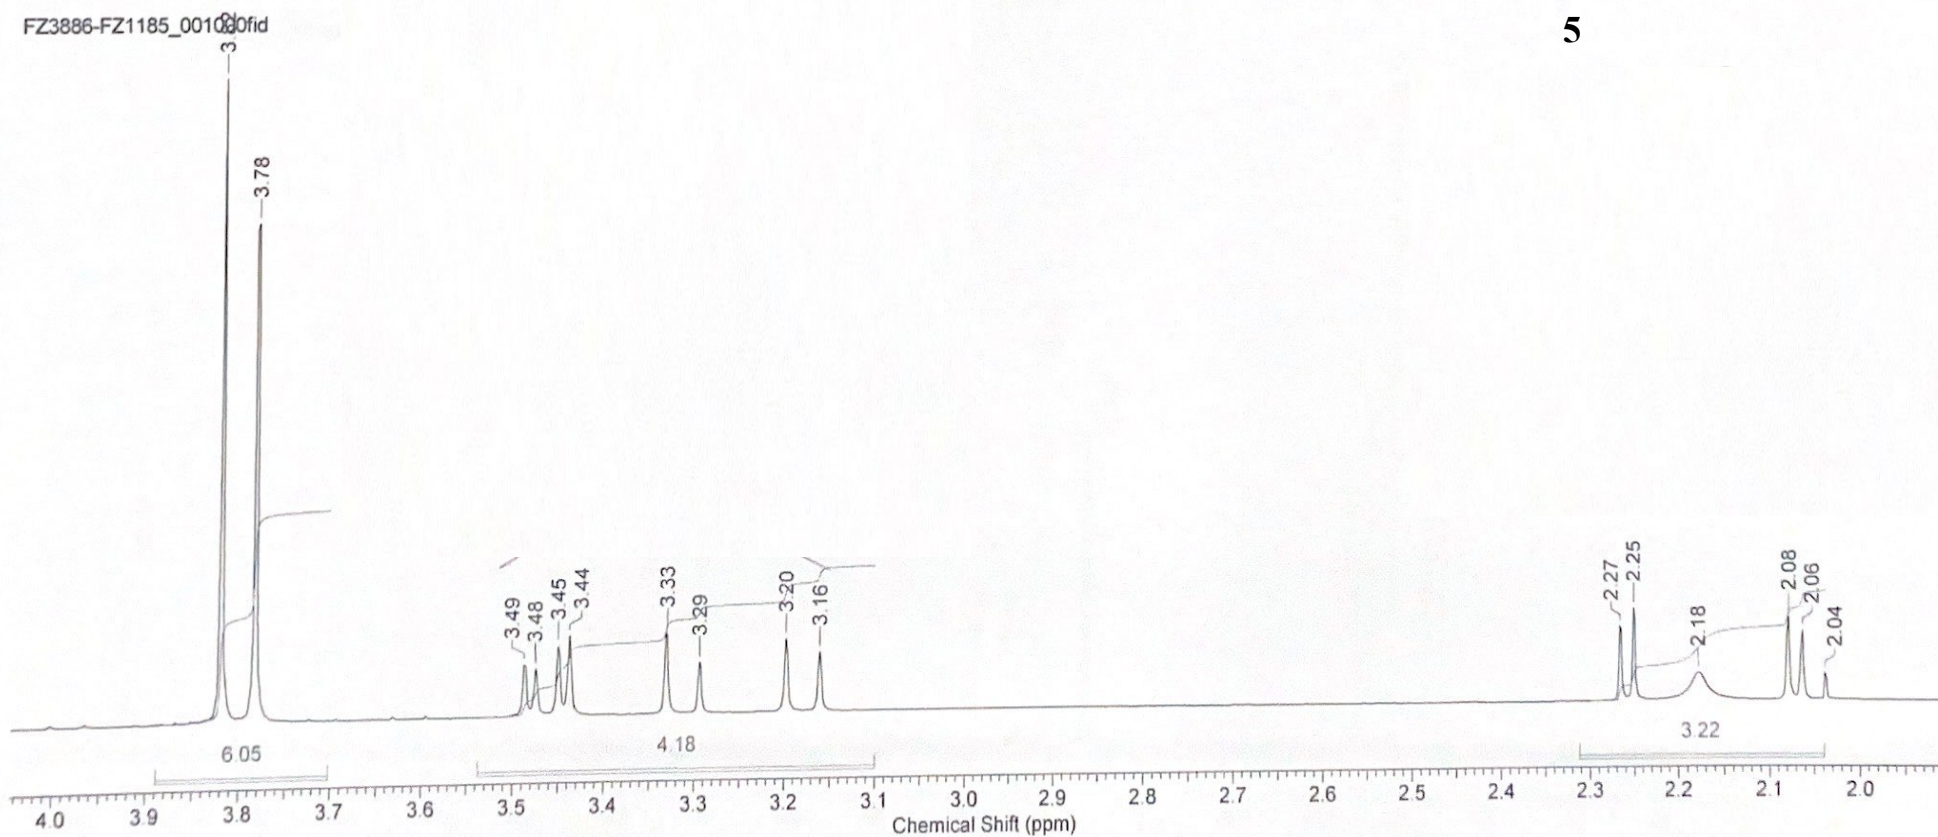



Formula C<sub>16</sub>H<sub>17</sub>NO<sub>6</sub> FW 319.3093

|                        |                      |                   |                                                                                     |                        |                      |                      |       |
|------------------------|----------------------|-------------------|-------------------------------------------------------------------------------------|------------------------|----------------------|----------------------|-------|
| Acquisition Time (sec) | 0.5571               | Comment           | 5 mm QNP 1H/15N/13C/31P Z3379/0400                                                  |                        | Date                 | 22 Oct 2014 14:56:00 |       |
| Date Stamp             | 22 Oct 2014 14:56:00 | File Name         | C:\Users\Fedor\Desktop\17.10.14\FZ3886-FZ1185-c13dec\FZ3886-FZ1185-c13dec_001000fid |                        | Number of Transients | 156                  |       |
| Frequency (MHz)        | 100.62               | Nucleus           | 13C                                                                                 | Points Count           | 16384                | Origin               | spect |
| Original Points Count  | 16384                | Owner             | root                                                                                | Points Count           | 16384                | Pulse Sequence       | zgpg  |
| Receiver Gain          | 32768.00             | SW(cyclical) (Hz) | 29411.77                                                                            | Solvent                | CHLOROFORM-d         |                      |       |
| Spectrum Offset (Hz)   | 9628.4102            | Sweep Width (Hz)  | 29409.97                                                                            | Temperature (degree C) | 27.000               |                      |       |

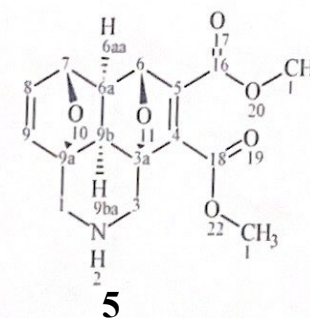

FZ3886-FZ1185-c13dec\_001000fid

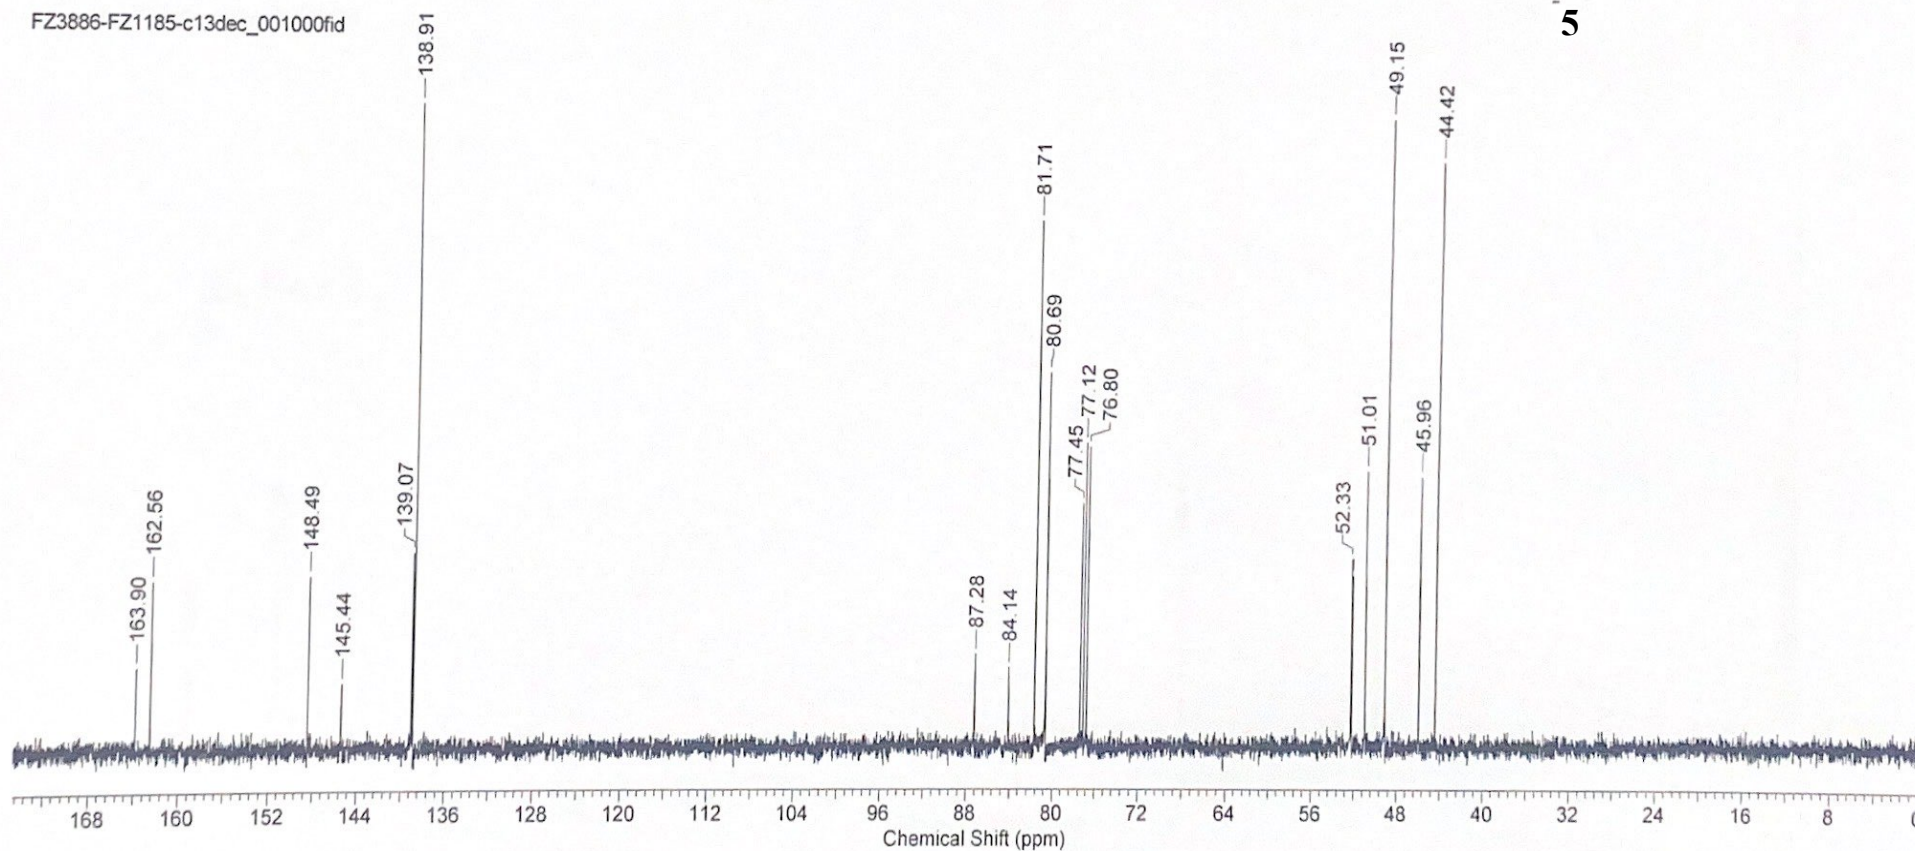

Supplement: d2ce00903j1.pdf [file d2ce00903j1.pdf]
